# Supplementary material for: Global Assessment of the Emission Impacts of Chemical Recycling Technologies for Plastics
Source: Research Square preprint supplement (doi:10.21203/rs.3.rs-6865649/v1), 2025-06-19
Supplement: Supplementary file 1 [file fa4cdaf36e107bc73a8b6ce3.pdf]

Supplementary Information for

# **Global Assessment of the Emission Impacts of Chemical Recycling Technologies for Plastics**

Nihan Karali<sup>1\*</sup>, Nina Khanna<sup>1</sup>, Akshay Sharma<sup>1</sup>

<sup>1</sup> *Lawrence Berkeley National Laboratory; Berkeley, 94720, USA.*

\* *Corresponding author. Email: [NKarali@lbl.gov](mailto:NKarali@lbl.gov)*

The PDF file includes:

Supplementary Table S1 to S20

Supplementary Figs. S1 to S11

Supplementary Methods

Supplementary References

**Supplementary Table S1. Polymer details of greenhouse gas (GHG) emissions from primary and recycled plastics in 2050 in the solvent-based recycling scenarios compared to the Reference scenario (GtCO<sub>2</sub>e)**

|                         | Reference | Realistic | Ambitious | High Ambitious | Extreme |
|-------------------------|-----------|-----------|-----------|----------------|---------|
| LDPE (primary)          | 0.23      | 0.23      | 0.22      | 0.16           | 0.11    |
| LDPE (recycled)         |           | 0.01      | 0.02      | 0.11           | 0.18    |
| LLDPE (primary)         | 0.35      | 0.34      | 0.33      | 0.23           | 0.17    |
| LLDPE (recycled)        |           | 0.01      | 0.02      | 0.17           | 0.27    |
| HDPE (primary)          | 0.49      | 0.47      | 0.43      | 0.30           | 0.25    |
| HDPE (recycled)         |           | 0.03      | 0.08      | 0.29           | 0.35    |
| PP (primary)            | 0.71      | 0.73      | 0.77      | 0.85           | 0.92    |
| PP (recycled)           |           | 0.05      | 0.14      | 0.33           | 0.52    |
| PET (primary)           | 0.98      | 0.96      | 0.93      | 0.91           | 0.90    |
| PET (recycled)          |           | 0.22      | 0.74      | 0.95           | 1.23    |
| PVC (primary)           | 0.47      | 0.46      | 0.46      | 0.45           | 0.41    |
| PVC (recycled)          |           | 0.03      | 0.10      | 0.23           | 0.68    |
| PS (primary)            | 0.27      | 0.27      | 0.26      | 0.21           | 0.15    |
| PS (recycled)           |           | 0.01      | 0.02      | 0.12           | 0.24    |
| ABS (primary)           | 0.10      | 0.10      | 0.09      | 0.08           | 0.06    |
| ABS (recycled)          |           | 0.01      | 0.01      | 0.07           | 0.13    |
| <b>Total (primary)</b>  | 3.60      | 3.56      | 3.50      | 3.18           | 2.99    |
| <b>Total (recycled)</b> |           | 0.37      | 1.13      | 2.29           | 3.61    |

**Supplementary Table S2. Sensitivity of GHG emissions per polymer in 2050 in the Realistic scenario of solvent-based recycling (GtCO<sub>2</sub>e)**

|       |           | MRF loss rate |       | Collection and MRF energy consumption |       | Polymer recovery rate |       | Solvent-based recycling and solvent / anti-solvent recovery energy consumption |       | Solvent and antisolvent recovery rate |       | Solvent and antisolvent amount |       |
|-------|-----------|---------------|-------|---------------------------------------|-------|-----------------------|-------|--------------------------------------------------------------------------------|-------|---------------------------------------|-------|--------------------------------|-------|
|       | Realistic | lower         | upper | lower                                 | upper | lower                 | upper | lower                                                                          | upper | lower                                 | upper | lower                          | upper |
| Total | 3.93      | 3.92          | 3.93  | 3.92                                  | 3.93  | 3.95                  | 3.92  | 3.90                                                                           | 3.94  | 4.53                                  | 3.86  | 3.82                           | 4.02  |
| LDPE  | 0.23      | 0.23          | 0.23  | 0.23                                  | 0.23  | 0.23                  | 0.23  | 0.23                                                                           | 0.23  | 0.24                                  | 0.23  | 0.23                           | 0.23  |
| LLDPE | 0.35      | 0.35          | 0.35  | 0.35                                  | 0.35  | 0.35                  | 0.35  | 0.35                                                                           | 0.35  | 0.36                                  | 0.35  | 0.35                           | 0.35  |
| HDPE  | 0.50      | 0.50          | 0.50  | 0.50                                  | 0.50  | 0.50                  | 0.50  | 0.50                                                                           | 0.50  | 0.52                                  | 0.50  | 0.49                           | 0.51  |
| PP    | 0.78      | 0.78          | 0.78  | 0.78                                  | 0.78  | 0.79                  | 0.78  | 0.77                                                                           | 0.79  | 0.83                                  | 0.77  | 0.76                           | 0.80  |
| PET   | 1.19      | 1.19          | 1.19  | 1.19                                  | 1.19  | 1.20                  | 1.19  | 1.18                                                                           | 1.19  | 1.66                                  | 1.15  | 1.13                           | 1.25  |
| PVC   | 0.50      | 0.50          | 0.50  | 0.49                                  | 0.50  | 0.50                  | 0.49  | 0.49                                                                           | 0.50  | 0.53                                  | 0.49  | 0.49                           | 0.50  |
| PS    | 0.28      | 0.28          | 0.28  | 0.28                                  | 0.28  | 0.28                  | 0.27  | 0.27                                                                           | 0.28  | 0.28                                  | 0.27  | 0.27                           | 0.28  |
| ABS   | 0.10      | 0.10          | 0.10  | 0.10                                  | 0.10  | 0.10                  | 0.10  | 0.10                                                                           | 0.10  | 0.11                                  | 0.10  | 0.10                           | 0.10  |

Note: See Materials and Methods for the sensitivity ranges applied per polymer. MRF = Material recovery facility.

**Supplementary Table S3. Sensitivity of GHG emissions per polymer in 2050 in the Extreme scenario of solvent-based recycling (GtCO<sub>2</sub>e)**

|  |  |               |                                       |                       |                                                                                |                                       |                                |
|--|--|---------------|---------------------------------------|-----------------------|--------------------------------------------------------------------------------|---------------------------------------|--------------------------------|
|  |  | MRF loss rate | Collection and MRF energy consumption | Polymer recovery rate | Solvent-based recycling and solvent / anti-solvent recovery energy consumption | Solvent and antisolvent recovery rate | Solvent and antisolvent amount |
|--|--|---------------|---------------------------------------|-----------------------|--------------------------------------------------------------------------------|---------------------------------------|--------------------------------|

|       | Extreme | lower | upper |
|-------|---------|-------|-------|-------|-------|-------|-------|-------|-------|-------|-------|-------|-------|
| Total | 6.60    | 6.58  | 6.66  | 6.54  | 6.66  | 6.84  | 6.52  | 6.37  | 6.83  | 5.98  | 11.5  | 5.64  | 7.56  |
| LDPE  | 0.29    | 0.29  | 0.29  | 0.29  | 0.29  | 0.30  | 0.29  | 0.27  | 0.31  | 0.28  | 0.39  | 0.25  | 0.33  |
| LLDPE | 0.44    | 0.43  | 0.44  | 0.43  | 0.44  | 0.45  | 0.43  | 0.41  | 0.46  | 0.42  | 0.58  | 0.38  | 0.49  |
| HDPE  | 0.61    | 0.61  | 0.62  | 0.60  | 0.62  | 0.63  | 0.60  | 0.58  | 0.64  | 0.58  | 0.80  | 0.54  | 0.68  |
| PP    | 1.45    | 1.44  | 1.46  | 1.43  | 1.47  | 1.51  | 1.44  | 1.36  | 1.54  | 1.37  | 2.01  | 1.24  | 1.66  |
| PET   | 2.13    | 2.12  | 2.15  | 2.12  | 2.14  | 2.21  | 2.12  | 2.10  | 2.16  | 1.90  | 4.74  | 1.81  | 2.45  |
| PVC   | 1.10    | 1.10  | 1.10  | 1.09  | 1.10  | 1.13  | 1.08  | 1.07  | 1.13  | 0.92  | 1.81  | 0.92  | 1.27  |
| PS    | 0.39    | 0.39  | 0.40  | 0.39  | 0.40  | 0.40  | 0.38  | 0.38  | 0.40  | 0.35  | 0.74  | 0.34  | 0.45  |
| ABS   | 0.19    | 0.19  | 0.20  | 0.19  | 0.20  | 0.21  | 0.18  | 0.19  | 0.20  | 0.16  | 0.42  | 0.16  | 0.23  |

Note: See Materials and Methods for the sensitivity ranges applied per polymer.

**Supplementary Table S4. Technology details of GHG emissions from plastics in 2050 in the depolymerization scenarios compared to the Reference scenario (GtCO<sub>2</sub>e)**

|                                 | Reference | Realistic | High Ambitious | Extreme |
|---------------------------------|-----------|-----------|----------------|---------|
| Enzymatic Hydrolysis (primary)  | 0.98      | 0.77      | 0.71           | 0.63    |
| Enzymatic Hydrolysis (recycled) |           | 0.25      | 0.29           | 0.38    |
| Methanolysis (primary)          | 0.98      | 0.97      | 0.65           | 0.42    |
| Methanolysis (recycled)         |           | 0.01      | 0.41           | 0.70    |
| Glycolysis (primary)            | 0.98      | 0.73      | 0.66           | 0.56    |
| Glycolysis (recycled)           |           | 0.12      | 0.16           | 0.21    |

**Supplementary Table S5. Sensitivity of GHG emissions in 2050 in the Realistic scenario of PET depolymerization scenarios (GtCO<sub>2</sub>e)**

|                      |           | MRF loss rate |       | Collection and MRF energy consumption |       | Monomer recovery rate |       | Depolymerization (incl., solvent recovery) energy consumption |       | NaOH production energy consumption for Enzymatic Hydrolysis & Solvent recovery rate for Methanolysis and Glycolysis |       |
|----------------------|-----------|---------------|-------|---------------------------------------|-------|-----------------------|-------|---------------------------------------------------------------|-------|---------------------------------------------------------------------------------------------------------------------|-------|
|                      | Realistic | lower         | upper | lower                                 | upper | lower                 | upper | lower                                                         | upper | lower                                                                                                               | upper |
| Enzymatic Hydrolysis | 1.00      | 0.99          | 1.01  | 0.99                                  | 1.00  | 1.01                  | 1.00  | 0.98                                                          | 1.01  | 0.99                                                                                                                | 1.01  |
| Methanolysis         | 1.03      | 1.03          | 1.04  | 1.03                                  | 1.04  | 1.05                  | 1.02  | 1.02                                                          | 1.05  | 1.02                                                                                                                | 1.12  |
| Glycolysis           | 0.86      | 0.85          | 0.87  | 0.85                                  | 0.86  | 0.87                  | 0.85  | 0.85                                                          | 0.86  | 0.87                                                                                                                | 0.85  |

Note: See Materials and Methods for the sensitivity ranges applied.

**Supplementary Table S6. Sensitivity of GHG emissions in 2050 in the Extreme scenario of PET depolymerization scenarios (GtCO<sub>2</sub>e)**

|  |         | MRF loss rate |       | Collection and MRF energy consumption |       | Monomer recovery rate |       | Depolymerization (incl., solvent recovery) energy consumption |       | NaOH production energy consumption for Enzymatic Hydrolysis & Solvent recovery rate for Methanolysis and Glycolysis |       |
|--|---------|---------------|-------|---------------------------------------|-------|-----------------------|-------|---------------------------------------------------------------|-------|---------------------------------------------------------------------------------------------------------------------|-------|
|  | Extreme | lower         | upper | lower                                 | upper | lower                 | upper | lower                                                         | upper | lower                                                                                                               | upper |

|                      |      |      |      |      |      |      |      |      |      |      |      |
|----------------------|------|------|------|------|------|------|------|------|------|------|------|
| Enzymatic Hydrolysis | 1.01 | 1.00 | 1.02 | 0.99 | 1.02 | 1.03 | 1.01 | 0.98 | 1.04 | 0.99 | 1.02 |
| Methanolysis         | 1.12 | 1.10 | 1.13 | 1.10 | 1.13 | 1.16 | 1.08 | 1.07 | 1.16 | 1.09 | 1.33 |
| Glycolysis           | 0.77 | 0.76 | 0.79 | 0.76 | 0.79 | 0.79 | 0.76 | 0.76 | 0.78 | 0.79 | 0.76 |

Note: See Materials and Methods for the sensitivity ranges applied.

**Supplementary Table S7. Polymer details of GHG emissions from primary and recycled plastics in 2050 in the pyrolysis scenarios compared to the Reference scenario (GtCO<sub>2</sub>e)**

|                         | Reference   | Realistic   | Ambitious   | High Ambitious | Extreme     |
|-------------------------|-------------|-------------|-------------|----------------|-------------|
| LDPE (primary)          | 0.23        | 0.22        | 0.21        | 0.19           | 0.14        |
| LDPE (recycled)         |             | 0.02        | 0.04        | 0.06           | 0.15        |
| LLDPE (primary)         | 0.35        | 0.33        | 0.32        | 0.29           | 0.22        |
| LLDPE (recycled)        |             | 0.03        | 0.06        | 0.09           | 0.22        |
| HDPE (primary)          | 0.49        | 0.46        | 0.44        | 0.40           | 0.29        |
| HDPE (recycled)         |             | 0.05        | 0.08        | 0.13           | 0.31        |
| PP (primary)            | 0.71        | 0.66        | 0.63        | 0.59           | 0.44        |
| PP (recycled)           |             | 0.07        | 0.12        | 0.20           | 0.48        |
| PS (primary)            | 0.27        | 0.27        | 0.24        | 0.21           | 0.17        |
| PS (recycled)           |             | 0.01        | 0.04        | 0.06           | 0.10        |
| <b>Total (primary)</b>  | <b>2.05</b> | <b>1.94</b> | <b>1.83</b> | <b>1.69</b>    | <b>1.26</b> |
| <b>Total (recycled)</b> |             | <b>0.18</b> | <b>0.33</b> | <b>0.55</b>    | <b>1.26</b> |

**Supplementary Table S8. GHG emission intensity of producing a tonne of recycled polymers via closed-loop pyrolysis vs primary production per polymer (kgCO<sub>2</sub>e/kg)**

|       | Pyrolysis (closed-loop) recycling | Primary production |
|-------|-----------------------------------|--------------------|
| LDPE  | 6.76                              | 4.77               |
| LLDPE | 6.96                              | 4.76               |
| HDPE  | 6.78                              | 4.73               |
| PP    | 6.74                              | 4.47               |
| PS    | 5.74                              | 6.48               |

**Supplementary Table S9. 1-1 Pyrolysis oil replacement sensitivity of GHG emissions in the closed-loop pyrolysis “Realistic and Extreme” scenario in 2050 (GtCO<sub>2</sub>e)**

|       | Pyrolysis oil: 1-1 replacement to light naphtha |           |         |
|-------|-------------------------------------------------|-----------|---------|
|       | Reference                                       | Realistic | Extreme |
| Total | 2.05                                            | 2.13      | 2.61    |
| LDPE  | 0.23                                            | 0.24      | 0.31    |
| LLDPE | 0.35                                            | 0.36      | 0.45    |
| HDPE  | 0.49                                            | 0.51      | 0.62    |
| PP    | 0.71                                            | 0.74      | 0.95    |
| PS    | 0.27                                            | 0.28      | 0.27    |

**Supplementary Table S10. Sensitivity of GHG emissions per polymer in 2050 in the Realistic scenario of pyrolysis scenarios (GtCO<sub>2</sub>e)**

|       |           | Pretreatment loss rate |       | Collection and pretreatment energy consumption |       | Pyrolysis oil and styrene recovery rate |       | Pyrolysis oil and styrene replacement rate |       | Pyrolysis energy consumption |       |
|-------|-----------|------------------------|-------|------------------------------------------------|-------|-----------------------------------------|-------|--------------------------------------------|-------|------------------------------|-------|
|       | Realistic | lower                  | upper | lower                                          | upper | lower                                   | upper | lower                                      | upper | lower                        | upper |
| Total | 2.116     | 2.101                  | 2.135 | 2.107                                          | 2.125 | 2.117                                   | 2.115 | 2.116                                      | 2.118 | 2.101                        | 2.132 |
| LDPE  | 0.241     | 0.239                  | 0.244 | 0.240                                          | 0.242 | 0.241                                   | 0.241 | 0.241                                      | 0.242 | 0.239                        | 0.243 |
| LLDPE | 0.362     | 0.359                  | 0.366 | 0.360                                          | 0.364 | 0.362                                   | 0.362 | 0.362                                      | 0.362 | 0.359                        | 0.365 |
| HDPE  | 0.505     | 0.501                  | 0.510 | 0.503                                          | 0.508 | 0.505                                   | 0.505 | 0.505                                      | 0.506 | 0.501                        | 0.509 |
| PP    | 0.731     | 0.725                  | 0.739 | 0.727                                          | 0.735 | 0.731                                   | 0.731 | 0.731                                      | 0.732 | 0.725                        | 0.738 |

|    |       |       |       |       |       |       |       |       |       |       |       |
|----|-------|-------|-------|-------|-------|-------|-------|-------|-------|-------|-------|
| PS | 0.276 | 0.277 | 0.277 | 0.276 | 0.277 | 0.278 | 0.276 | 0.277 | 0.276 | 0.276 | 0.277 |
|----|-------|-------|-------|-------|-------|-------|-------|-------|-------|-------|-------|

Note: See Materials and Methods for the sensitivity ranges applied.

**Supplementary Table S11. Sensitivity of GHG emissions per polymer in 2050 in the Extreme scenario of pyrolysis scenarios (GtCO<sub>2</sub>e)**

|       |         | Pretreatment loss rate |       | Collection and pretreatment energy consumption |       | Pyrolysis oil and styrene recovery rate |       | Pyrolysis oil and styrene replacement rate |       | Pyrolysis energy consumption |       |
|-------|---------|------------------------|-------|------------------------------------------------|-------|-----------------------------------------|-------|--------------------------------------------|-------|------------------------------|-------|
|       | Extreme | lower                  | upper | lower                                          | upper | lower                                   | upper | lower                                      | upper | lower                        | upper |
| Total | 2.519   | 2.426                  | 2.647 | 2.457                                          | 2.581 | 2.539                                   | 2.509 | 2.527                                      | 2.532 | 2.419                        | 2.797 |
| LDPE  | 0.294   | 0.282                  | 0.310 | 0.287                                          | 0.301 | 0.294                                   | 0.294 | 0.293                                      | 0.296 | 0.281                        | 0.327 |
| LLDPE | 0.436   | 0.418                  | 0.459 | 0.425                                          | 0.447 | 0.436                                   | 0.436 | 0.435                                      | 0.438 | 0.418                        | 0.484 |
| HDPE  | 0.601   | 0.575                  | 0.633 | 0.585                                          | 0.616 | 0.600                                   | 0.601 | 0.600                                      | 0.604 | 0.575                        | 0.669 |
| PP    | 0.916   | 0.876                  | 0.967 | 0.892                                          | 0.940 | 0.916                                   | 0.917 | 0.914                                      | 0.922 | 0.876                        | 1.021 |
| PS    | 0.273   | 0.274                  | 0.278 | 0.268                                          | 0.278 | 0.293                                   | 0.260 | 0.285                                      | 0.272 | 0.269                        | 0.296 |

Note: See Materials and Methods for the sensitivity ranges applied.

**Supplementary Table S12. Polymer details of GHG emissions from primary and recycled plastics in 2050 in the gasification and F-T (Fischer–Tropsch) synthesis scenarios compared to the Reference scenario (GtCO<sub>2</sub>e)**

|                         | Reference | Realistic | Ambitious | High Ambitious | Extreme |
|-------------------------|-----------|-----------|-----------|----------------|---------|
| LDPE (primary)          | 0.23      | 0.22      | 0.22      | 0.21           | 0.19    |
| LDPE (recycled)         |           | 0.02      | 0.04      | 0.07           | 0.11    |
| LLDPE (primary)         | 0.35      | 0.34      | 0.33      | 0.31           | 0.29    |
| LLDPE (recycled)        |           | 0.04      | 0.06      | 0.10           | 0.17    |
| HDPE (primary)          | 0.49      | 0.47      | 0.46      | 0.44           | 0.41    |
| HDPE (recycled)         |           | 0.05      | 0.09      | 0.14           | 0.24    |
| PP (primary)            | 0.71      | 0.68      | 0.66      | 0.63           | 0.59    |
| PP (recycled)           |           | 0.08      | 0.13      | 0.22           | 0.37    |
| PET (primary)           | 0.98      | 0.94      | 0.91      | 0.87           | 0.79    |
| PET (recycled)          |           | 0.09      | 0.15      | 0.24           | 0.41    |
| PS (primary)            | 0.27      | 0.26      | 0.26      | 0.24           | 0.22    |
| PS (recycled)           |           | 0.02      | 0.04      | 0.07           | 0.12    |
| <b>Total (primary)</b>  | 3.03      | 2.91      | 2.83      | 2.71           | 2.49    |
| <b>Total (recycled)</b> |           | 0.30      | 0.50      | 0.84           | 1.42    |

**Supplementary Table S13. GHG emission intensity of producing a tonne of recycled polymers via closed-loop gasification and F-T synthesis vs primary production per polymer (kgCO<sub>2</sub>e/kg)**

|       | Pyrolysis closed-loop recycling | Primary production |
|-------|---------------------------------|--------------------|
| LDPE  | 13.42                           | 4.77               |
| LLDPE | 13.38                           | 4.76               |
| HDPE  | 13.40                           | 4.73               |
| PP    | 14.63                           | 4.47               |
| PS    | 15.75                           | 6.48               |
| PET   | 17.33                           | 6.54               |

**Supplementary Table S14. Polymer details of GHG emissions from primary and recycled plastics in 2050 in the gasification and methanol synthesis scenarios compared to the Reference scenario (GtCO<sub>2</sub>e)**

|                 | Reference | Realistic | Ambitious | High Ambitious | Extreme |
|-----------------|-----------|-----------|-----------|----------------|---------|
| LDPE (primary)  | 0.23      | 0.22      | 0.21      | 0.19           | 0.17    |
| LDPE (recycled) |           | 0.07      | 0.12      | 0.19           | 0.32    |
| LLDPE (primary) | 0.35      | 0.33      | 0.31      | 0.29           | 0.25    |

|                  |             |             |             |             |             |
|------------------|-------------|-------------|-------------|-------------|-------------|
| LLDPE (recycled) |             | 0.11        | 0.18        | 0.30        | 0.50        |
| HDPE (primary)   | 0.49        | 0.46        | 0.44        | 0.40        | 0.34        |
| HDPE (recycled)  |             | 0.15        | 0.26        | 0.41        | 0.69        |
| PP (primary)     | 0.71        | 0.66        | 0.63        | 0.59        | 0.51        |
| PP (recycled)    |             | 0.27        | 0.45        | 0.75        | 1.26        |
| PET (primary)    | 0.98        | 0.91        | 0.87        | 0.79        | 0.66        |
| PET (recycled)   |             | 0.11        | 0.18        | 0.27        | 0.44        |
| PS (primary)     | 0.27        | 0.26        | 0.25        | 0.23        | 0.20        |
| PS (recycled)    |             | 0.03        | 0.04        | 0.06        | 0.10        |
| <b>Primary</b>   | <b>3.03</b> | <b>2.83</b> | <b>2.71</b> | <b>2.49</b> | <b>2.12</b> |
| <b>Recycled</b>  | <b>0.00</b> | <b>0.74</b> | <b>1.23</b> | <b>1.99</b> | <b>3.31</b> |

**Supplementary Table S15. GHG emission intensity of producing a tonne of recycled polymers via closed-loop gasification and methanol synthesis vs primary production per polymer (kgCO<sub>2</sub>e/kg)**

|       | Pyrolysis closed-loop recycling | Primary production |
|-------|---------------------------------|--------------------|
| LDPE  | 25.54                           | 4.77               |
| LLDPE | 26.16                           | 4.76               |
| HDPE  | 25.75                           | 4.73               |
| PP    | 29.37                           | 4.47               |
| PS    | 10.14                           | 6.48               |
| PET   | 11.95                           | 6.54               |

**Supplementary Table S16. Sensitivity of GHG emissions per polymer in 2050 in the Realistic scenario of gasification and F-T synthesis scenarios (GtCO<sub>2</sub>e)**

|       |           | Pretreatment loss rate |       | Collection and pretreatment energy consumption |       | Syngas recovery rate |       | F-T oil replacement rate |       | Gasification and F-T synthesis energy consumption |       |
|-------|-----------|------------------------|-------|------------------------------------------------|-------|----------------------|-------|--------------------------|-------|---------------------------------------------------|-------|
|       |           | lower                  | upper | lower                                          | upper | lower                | upper | lower                    | upper | lower                                             | upper |
| Total | Realistic | 3.198                  | 3.198 | 3.194                                          | 3.202 | 3.197                | 3.199 | 3.183                    | 3.205 | 3.165                                             | 3.231 |
| LDPE  |           | 0.245                  | 0.245 | 0.245                                          | 0.246 | 0.245                | 0.246 | 0.244                    | 0.246 | 0.243                                             | 0.248 |
| LLDPE |           | 0.369                  | 0.369 | 0.368                                          | 0.369 | 0.369                | 0.369 | 0.367                    | 0.370 | 0.365                                             | 0.373 |
| HDPE  |           | 0.518                  | 0.518 | 0.517                                          | 0.519 | 0.518                | 0.518 | 0.515                    | 0.519 | 0.512                                             | 0.524 |
| PP    |           | 0.753                  | 0.752 | 0.753                                          | 0.751 | 0.754                | 0.752 | 0.753                    | 0.748 | 0.744                                             | 0.761 |
| PS    |           | 0.286                  | 0.286 | 0.286                                          | 0.287 | 0.286                | 0.286 | 0.285                    | 0.287 | 0.284                                             | 0.289 |
| PET   |           | 1.027                  | 1.027 | 1.026                                          | 1.028 | 1.027                | 1.027 | 1.023                    | 1.029 | 1.018                                             | 1.036 |

Note: See Materials and Methods for the sensitivity ranges applied.

**Supplementary Table S17. Sensitivity of GHG emissions per polymer in 2050 in the Extreme scenario of gasification and F-T synthesis scenarios (GtCO<sub>2</sub>e)**

|       |         | Pretreatment loss rate |       | Collection and pretreatment energy consumption |       | Syngas recovery rate |       | F-T oil replacement rate |       | Gasification and F-T synthesis energy consumption |       |
|-------|---------|------------------------|-------|------------------------------------------------|-------|----------------------|-------|--------------------------|-------|---------------------------------------------------|-------|
|       | Extreme | lower                  | upper | lower                                          | upper | lower                | upper | lower                    | upper | lower                                             | upper |
| Total | 3.864   | 3.862                  | 3.866 | 3.844                                          | 3.884 | 3.861                | 3.867 | 3.795                    | 3.898 | 3.709                                             | 4.019 |
| LDPE  | 0.299   | 0.299                  | 0.299 | 0.297                                          | 0.300 | 0.298                | 0.299 | 0.293                    | 0.302 | 0.286                                             | 0.312 |
| LLDPE | 0.448   | 0.448                  | 0.449 | 0.446                                          | 0.451 | 0.448                | 0.449 | 0.440                    | 0.453 | 0.429                                             | 0.468 |
| HDPE  | 0.630   | 0.630                  | 0.631 | 0.627                                          | 0.634 | 0.630                | 0.631 | 0.618                    | 0.637 | 0.603                                             | 0.658 |
| PP    | 0.950   | 0.950                  | 0.951 | 0.945                                          | 0.956 | 0.949                | 0.952 | 0.931                    | 0.960 | 0.908                                             | 0.992 |
| PS    | 0.335   | 0.335                  | 0.335 | 0.334                                          | 0.337 | 0.335                | 0.336 | 0.330                    | 0.338 | 0.324                                             | 0.346 |
| PET   | 1.200   | 1.200                  | 1.201 | 1.195                                          | 1.206 | 1.200                | 1.200 | 1.182                    | 1.209 | 1.158                                             | 1.243 |

Note: See Materials and Methods for the sensitivity ranges applied.

**Supplementary Table S18. Sensitivity of GHG emissions per polymer in 2050 in the Realistic scenario of gasification and methanol synthesis scenarios (GtCO<sub>2</sub>e)**

|       |       | Pretreatment loss rate |       | Collection and pretreatment energy consumption |       | Syngas recovery rate |       | Gasification and methanol synthesis energy consumption |       |
|-------|-------|------------------------|-------|------------------------------------------------|-------|----------------------|-------|--------------------------------------------------------|-------|
|       |       | lower                  | upper | lower                                          | upper | lower                | upper | lower                                                  | upper |
| Total | 3.570 | 3.569                  | 3.571 | 3.562                                          | 3.578 | 3.568                | 3.572 | 3.556                                                  | 3.584 |
| LDPE  | 0.290 | 0.290                  | 0.290 | 0.289                                          | 0.290 | 0.290                | 0.290 | 0.288                                                  | 0.291 |
| LLDPE | 0.438 | 0.438                  | 0.438 | 0.437                                          | 0.439 | 0.438                | 0.438 | 0.436                                                  | 0.440 |
| HDPE  | 0.610 | 0.609                  | 0.610 | 0.608                                          | 0.611 | 0.609                | 0.610 | 0.607                                                  | 0.612 |
| PP    | 0.931 | 0.930                  | 0.931 | 0.928                                          | 0.933 | 0.930                | 0.931 | 0.927                                                  | 0.934 |
| PS    | 0.285 | 0.285                  | 0.285 | 0.284                                          | 0.285 | 0.285                | 0.285 | 0.284                                                  | 0.286 |
| PET   | 1.017 | 1.017                  | 1.018 | 1.015                                          | 1.019 | 1.017                | 1.018 | 1.014                                                  | 1.021 |

Note: See Materials and Methods for the sensitivity ranges applied.

**Supplementary Table S19. Sensitivity of GHG emissions per polymer in 2050 in the Extreme scenario of gasification and methanol synthesis scenarios (GtCO<sub>2</sub>e)**

|       |       | Pretreatment loss rate |       | Collection and pretreatment energy consumption |       | Syngas recovery rate |       | Gasification and methanol synthesis energy consumption |       |
|-------|-------|------------------------|-------|------------------------------------------------|-------|----------------------|-------|--------------------------------------------------------|-------|
|       |       | lower                  | upper | lower                                          | upper | lower                | upper | lower                                                  | upper |
| Total | 3.864 | 5.619                  | 5.626 | 5.586                                          | 5.658 | 5.615                | 5.630 | 5.556                                                  | 5.688 |
| LDPE  | 0.299 | 0.508                  | 0.509 | 0.505                                          | 0.511 | 0.508                | 0.509 | 0.503                                                  | 0.514 |
| LLDPE | 0.448 | 0.775                  | 0.776 | 0.771                                          | 0.780 | 0.774                | 0.776 | 0.767                                                  | 0.784 |
| HDPE  | 0.630 | 1.067                  | 1.068 | 1.061                                          | 1.074 | 1.066                | 1.069 | 1.056                                                  | 1.080 |
| PP    | 0.950 | 1.797                  | 1.799 | 1.788                                          | 1.808 | 1.796                | 1.800 | 1.780                                                  | 1.816 |
| PS    | 0.335 | 0.319                  | 0.319 | 0.316                                          | 0.322 | 0.319                | 0.320 | 0.314                                                  | 0.324 |
| PET   | 1.200 | 1.153                  | 1.155 | 1.144                                          | 1.163 | 1.152                | 1.156 | 1.137                                                  | 1.171 |

Note: See Materials and Methods for the sensitivity ranges applied.

**Supplementary Table S20. Global Examples of Chemical Recycling Plants by Technology Type and Operational Status**

| Plant Name                                   | Status                     | Process type                           | Plastic polymers    | Capacity (latest available data) |
|----------------------------------------------|----------------------------|----------------------------------------|---------------------|----------------------------------|
| Irononton Facility/PureCycle                 | Operational                | Dissolution                            | PP                  | ~50,000 tonnes/year              |
| CreaSolv Pilot Plant                         | Pilot - Closed (2019-2021) | Dissolution                            | PEs                 | 46,2 tonnes over 2 years         |
| CreaSolv Demonstration plant- Lober/CreaSolv | Pilot - Closed (2018-2021) | Dissolution                            | PEs, PP             |                                  |
| MultiCycle CreaSolv Pilot plant              | Pilot - Operational        | Dissolution                            | PEs, PP PET, PA     |                                  |
| CreaSolv PVC Prototype recycling plant       | Operational                | Dissolution                            | PVC                 |                                  |
| revolPET/RITTEC Umwelttechnik GmbH           | Pilot-Unknown              | Depolymerization (Hydrolysis)          | PET                 |                                  |
| Denka                                        | Operational                | Pyrolysis - Closed Loop                | PS                  | 3,000 tonnes/year                |
| Alterra                                      |                            | Pyrolysis                              | PEs, PP, PS         | 60 tonnes/day                    |
| Regenyx/Amsty                                | Closed                     | Pyrolysis                              | PS                  | 4,400 tonnes/year                |
| Rewind PET/Axens                             |                            | Depolymerization (Glycolysis)          | PET                 |                                  |
| Rewind Mix/Axens                             |                            | Pyrolysis                              | PEs, PP             |                                  |
| TAC/Plastic Energy                           |                            | Pyrolysis                              | PEs, PP             |                                  |
| Caojing/BASF                                 | Operational                | Depolymerization                       | PA                  | 500 tonnes/year                  |
| OMV ReOil Plant                              | Operational                | Pyrolysis                              | PEs, PP             |                                  |
| OMV ReOil Pilot Plant                        | Pilot - Operational        | Pyrolysis                              | PE, PP              |                                  |
| Trinity Oaks Tyler/New Hope Energy           | Operational                | Pyrolysis                              | PE, PET, PS, PP     |                                  |
| Atlanta Plant/Nexus Circular                 | Operational                | Pyrolysis                              | PEs, PS, PP         |                                  |
| Honeywell                                    | Operational                | Pyrolysis                              |                     |                                  |
| Plastic Energy                               | Operational                | Pyrolysis                              | MPW                 |                                  |
| Plastic Energy                               | Operational                | Pyrolysis                              | MPW                 |                                  |
| Clermont-Ferrand Demonstration Plant/Carbios | Operational                | Depolymerization                       | PET                 | 40,000-tonne/year                |
| Clariter                                     | Pilot - Operational        | Pyrolysis                              | PEs, PS, PP         |                                  |
| Clariter                                     | Operational                | Pyrolysis                              | PEs, PS, PP         | 60,000 tonnes/year               |
| Greenback                                    | Operational                | Pyrolysis                              | PEs, PS, PP         | 3,000 tonnes/year                |
| GR3N                                         | Pilot - Operational        | Depolymerization                       | PET                 | 40,000 tonnes/year               |
| Pilot Plant/BlueAlp                          | Pilot - Operational        | Pyrolysis                              | Mixed Plastic Waste | 3000 tonnes/year                 |
| Commercial Prototype Plant/BlueAlp           |                            | Pyrolysis                              | Mixed Plastic Waste | 24,500 tonnes/year               |
| Orlen Unipetrol                              | Closed                     | Pyrolysis                              |                     |                                  |
| Quantafuel                                   | Operational                | Pyrolysis                              | Mixed Plastic Waste | 20,000 tonnes/year               |
| Revalyu Resources                            | Operational                | Depolymerization                       | PET                 | 160 PET tonnes/day               |
| Corsair                                      | Operational                | Pyrolysis                              | Mixed Plastic Waste |                                  |
| Eastman Chemical Company                     | Operational                | Gasification, Glycolysis, Methanolysis | PET                 | 110,000 tonnes/year              |

*Note: This table presents selected examples of chemical recycling plants worldwide with publicly available data and is not intended as a comprehensive inventory of all existing facilities. PA = Polyamide. MPW = Mixed Plastic Waste.*



## Supplementary Figures (referred in the main text)

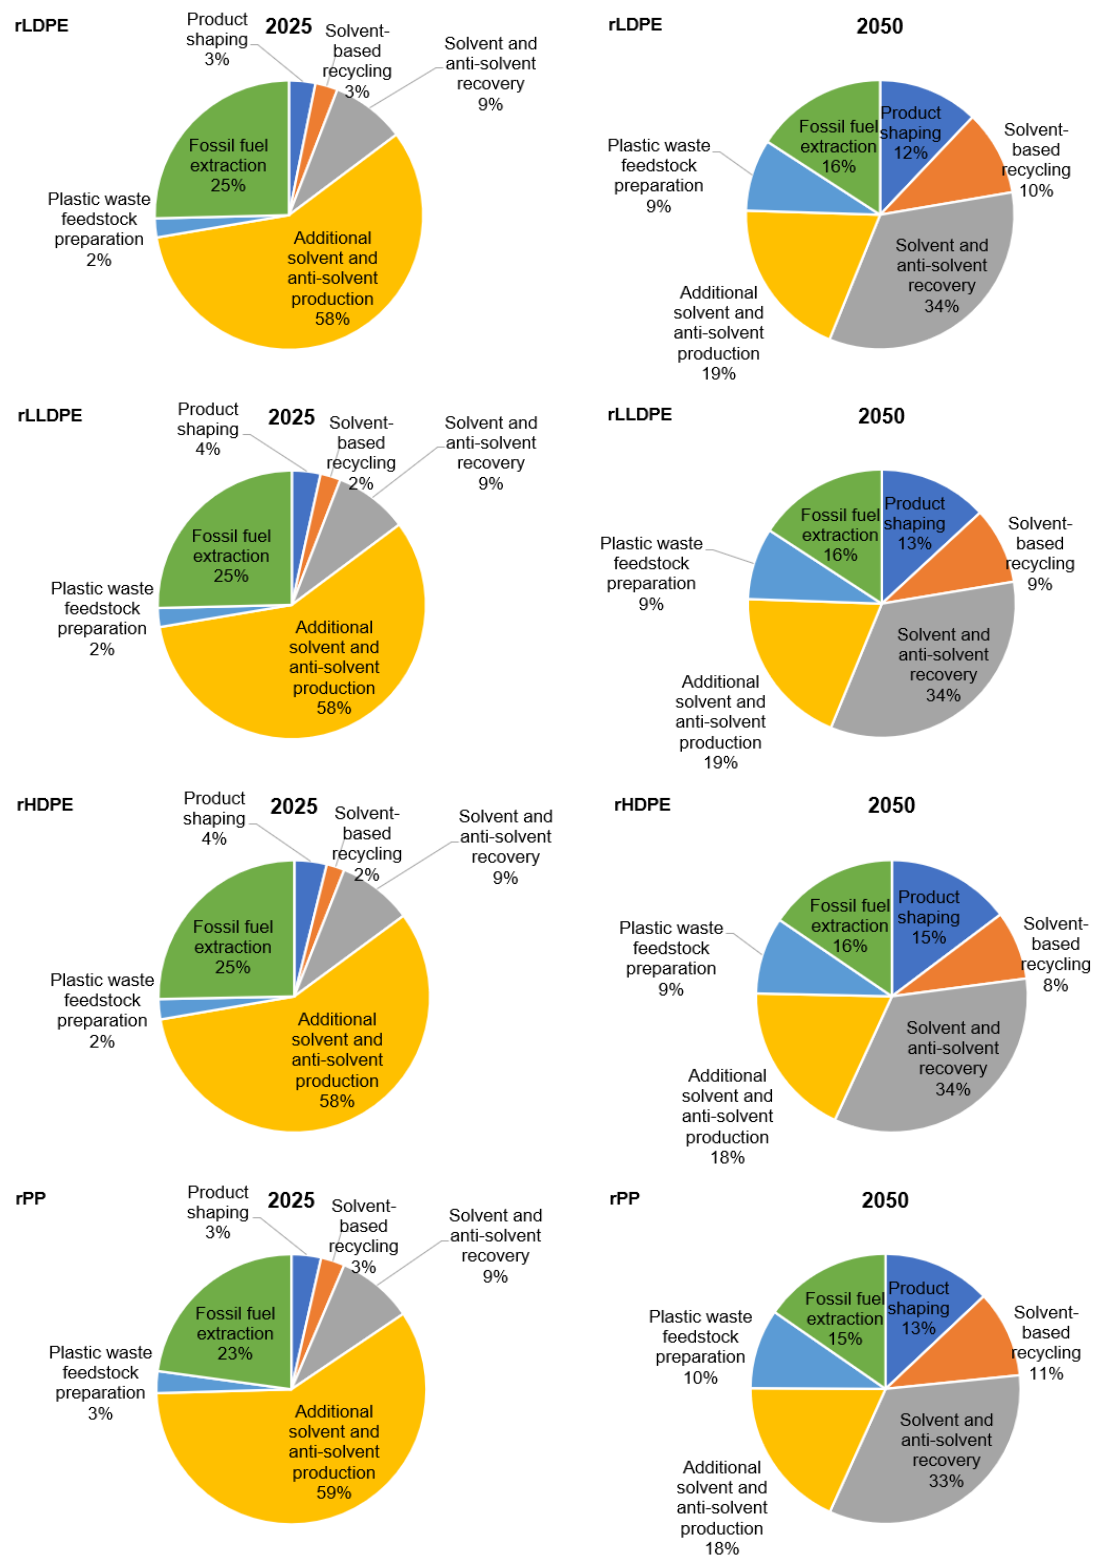

**Supplementary Fig. S1. GHG emission contribution of production stages per polymer (LDPE, LLDPE, HDPE, PP) in 2025 and 2050 in the Realistic scenario of solvent-based recycling scenarios**

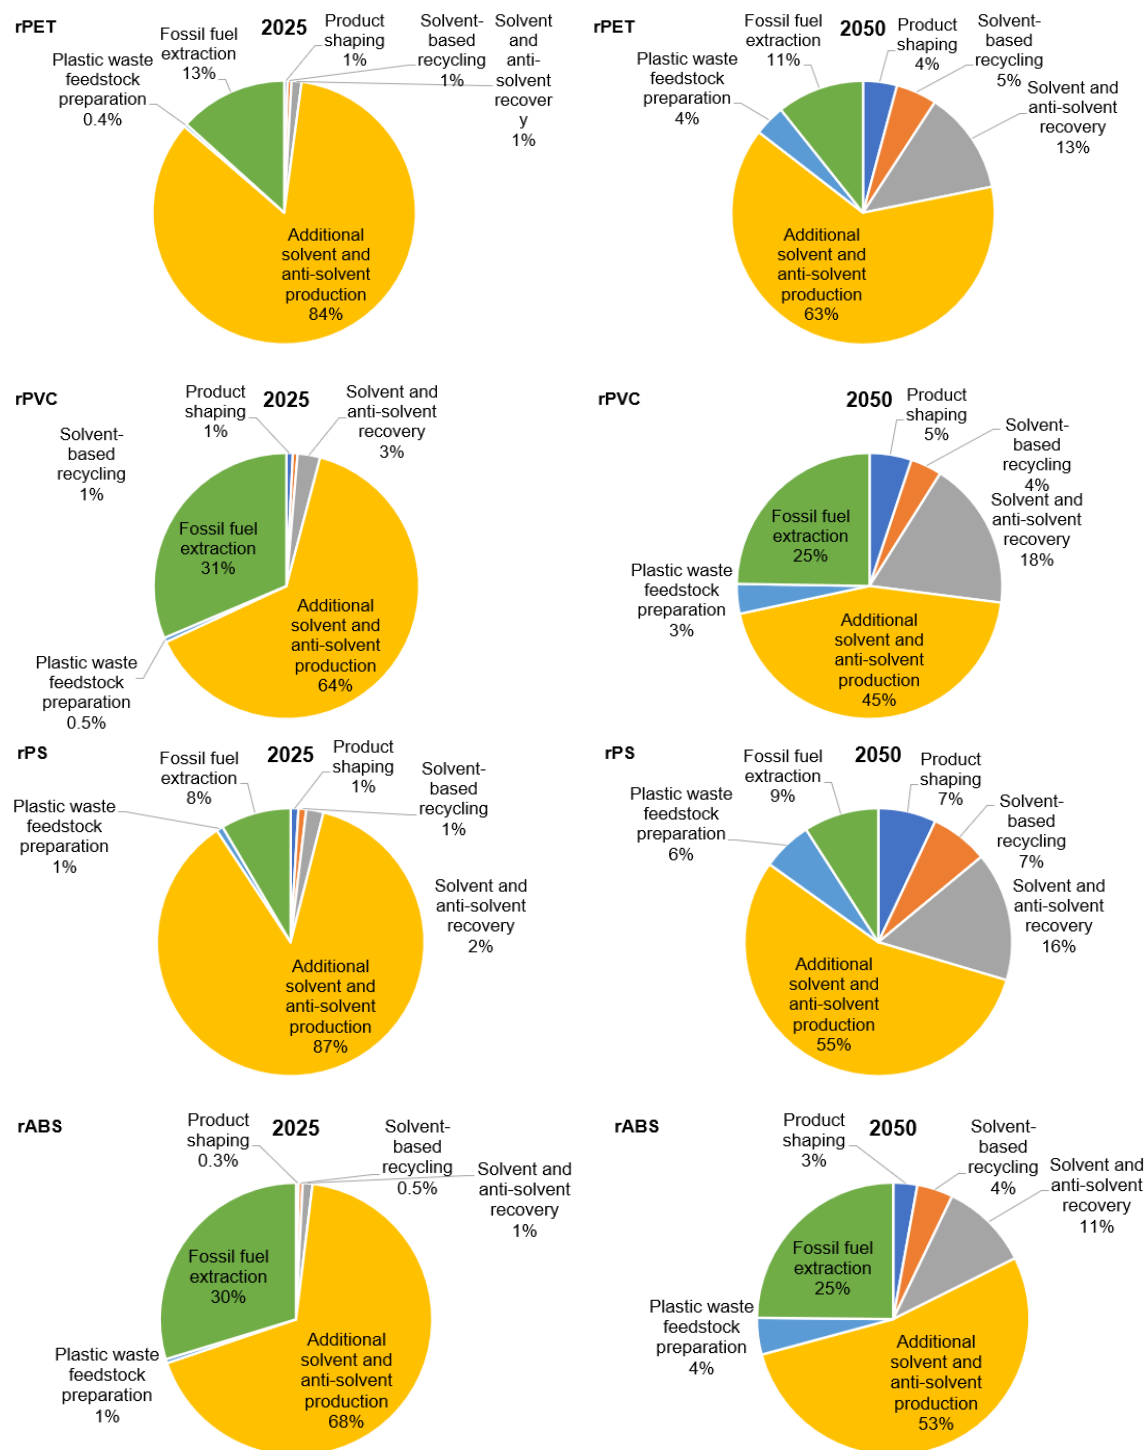

**Supplementary Fig. S2. GHG emission contribution of production stages per polymer (PET, PVC, PS, ABS) in 2025 and 2050 in the Realistic scenario of solvent-based recycling scenarios**

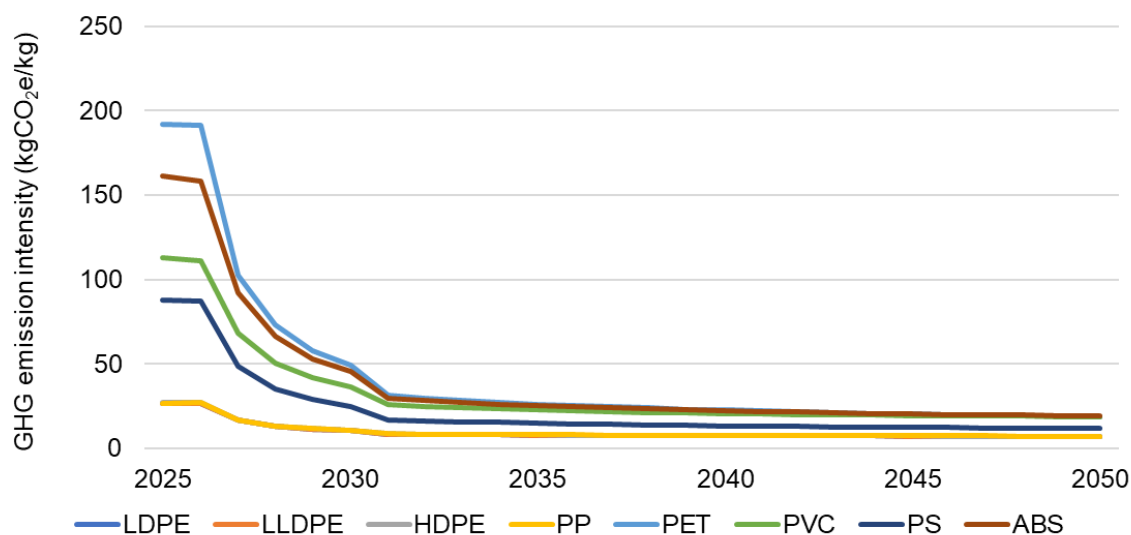

**Supplementary Fig. S3. Changes in GHG emission intensity for solvent-based recycling by polymer type over the modeling horizon in the Realistic scenario (kgCO<sub>2</sub>e/kg)**

Note: The emission intensity levels for LDPE, LLDPE, HDPE, and PP are similar and show overlapping ranges in the chart. All plastic polymer types exhibit consistent trends and comparable intensity levels across all analyzed scenarios (i.e., Realistic, Ambitious, High ambitious, and Extreme scenarios).

GHG emission intensity of producing a tonne of recycled plastic via solvent-based process vs primary production per polymer (kgCO<sub>2</sub>e/kg)

|       | Solvent and non-solvent production included | Only solvent and non-solvent loss included | Primary production |
|-------|---------------------------------------------|--------------------------------------------|--------------------|
| LDPE  | 26.55                                       | 5.79                                       | 4.77               |
| LLDPE | 26.55                                       | 5.79                                       | 4.76               |
| HDPE  | 26.95                                       | 5.93                                       | 4.73               |
| PP    | 26.80                                       | 5.98                                       | 4.47               |
| PET   | 192.27                                      | 8.76                                       | 6.54               |
| PVC   | 113.00                                      | 12.48                                      | 4.77               |
| PS    | 88.02                                       | 7.17                                       | 6.48               |
| ABS   | 161.12                                      | 9.77                                       | 5.01               |

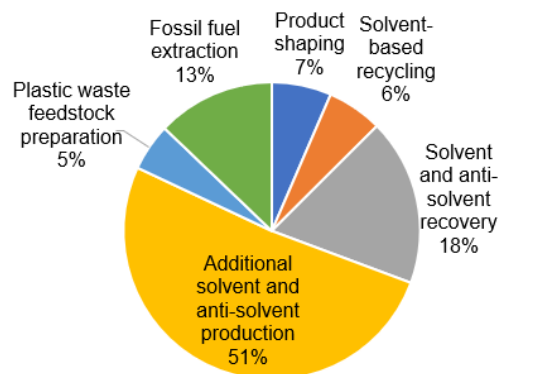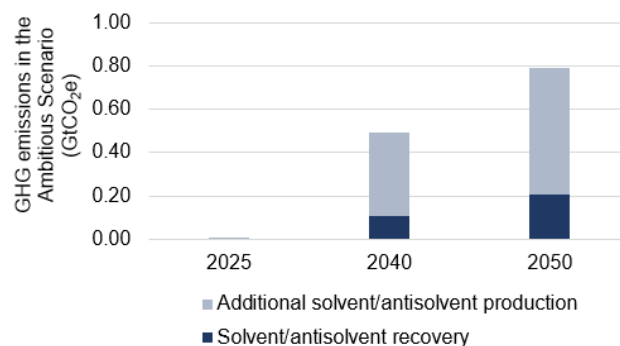

|                                                   | 2025 | 2040  | 2050  |
|---------------------------------------------------|------|-------|-------|
| <b>Total solvent/antisolvent demand (Mtonnes)</b> | 0.16 | 1,846 | 3,562 |
| from recovery (%)                                 | 0%   | 90%   | 92%   |
| from additional production (%)                    | 100% | 10%   | 8%    |

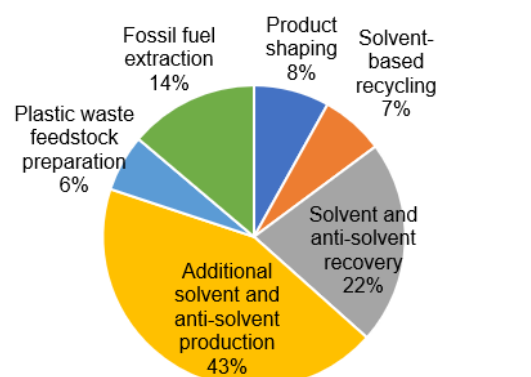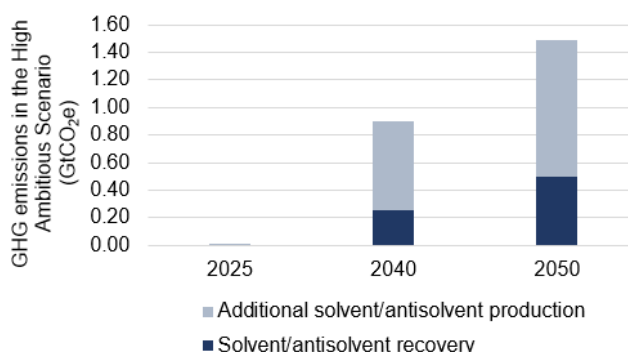

|                                                   | 2025 | 2040  | 2050  |
|---------------------------------------------------|------|-------|-------|
| <b>Total solvent/antisolvent demand (Mtonnes)</b> | 0.16 | 4,431 | 8,600 |
| from recovery (%)                                 | 0%   | 90%   | 91%   |
| from additional production (%)                    | 100% | 10%   | 9%    |

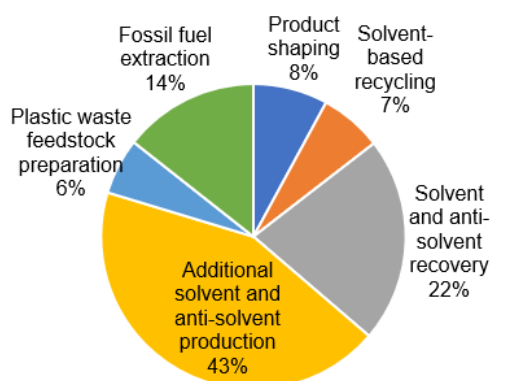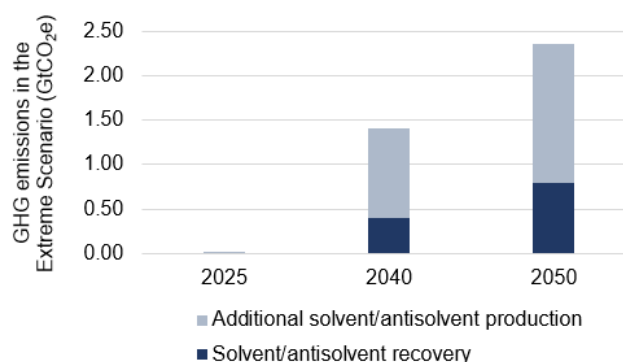

|                                                   | 2025 | 2040  | 2050   |
|---------------------------------------------------|------|-------|--------|
| <b>Total solvent/antisolvent demand (Mtonnes)</b> | 0.16 | 7,040 | 13,676 |
| from recovery (%)                                 | 0%   | 89%   | 91%    |
| from additional production (%)                    | 100% | 11%   | 9%     |

**Supplementary Fig. S4. GHG emission contribution of production stages in 2050 and demand for and GHG emissions from solvent/anti solvent recovery and additional production in the Ambitious, High ambitious, and Extreme scenarios of solvent-based recycling scenarios.**

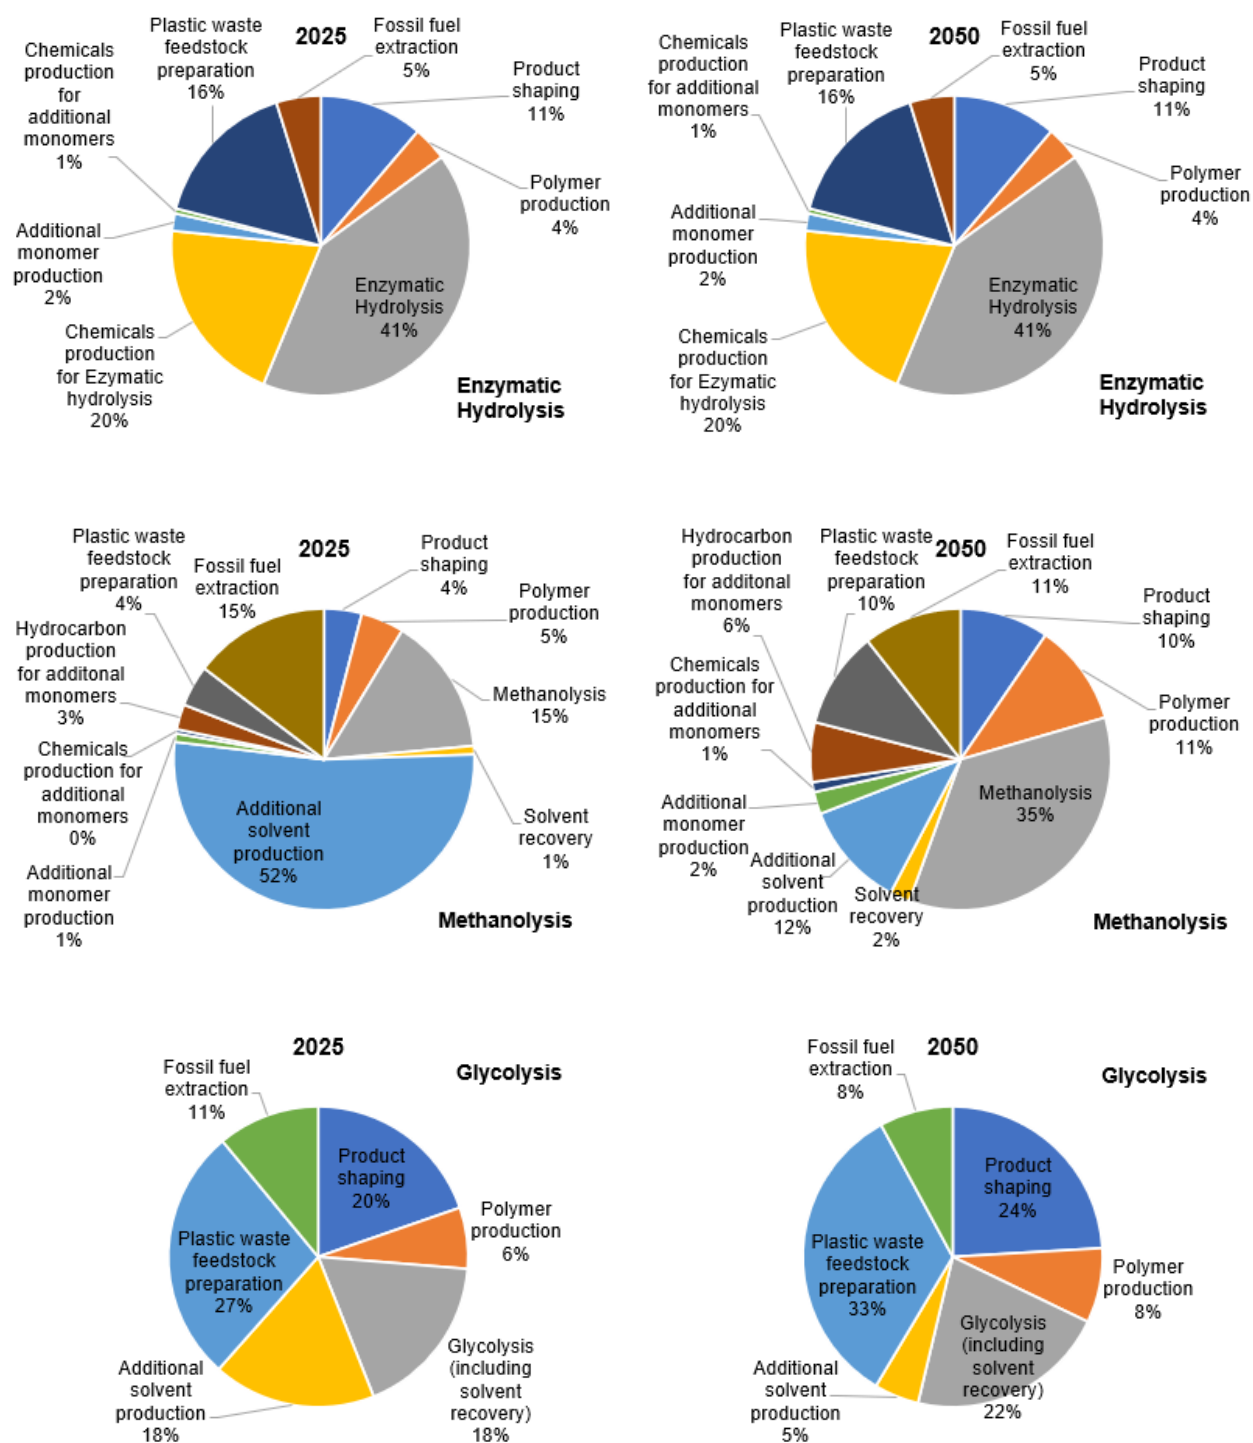

**Supplementary Fig. S5. GHG emission contribution of production stages in 2025 and 2050 in the Realistic scenario of PET depolymerization**

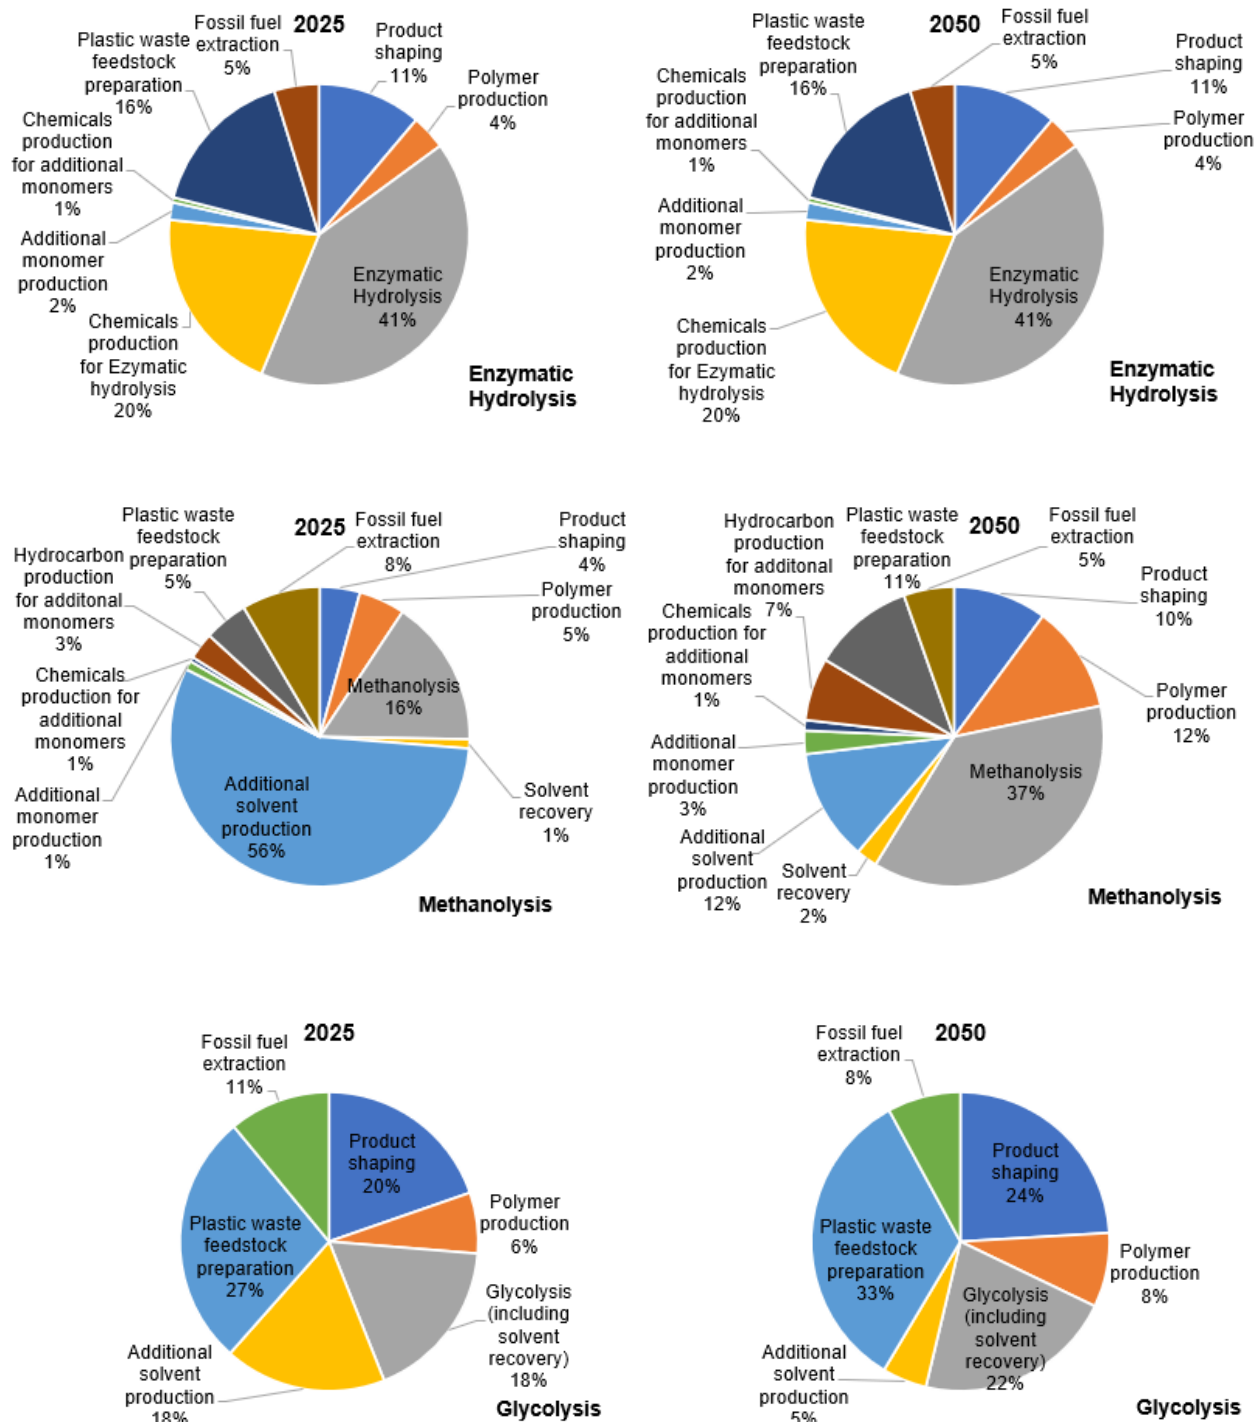

**Supplementary Fig. S6. GHG emission contribution of production stages in 2025 and 2050 in the High Ambitious scenario of PET depolymerization**

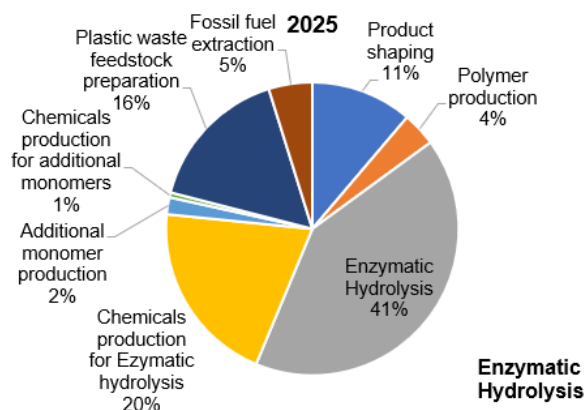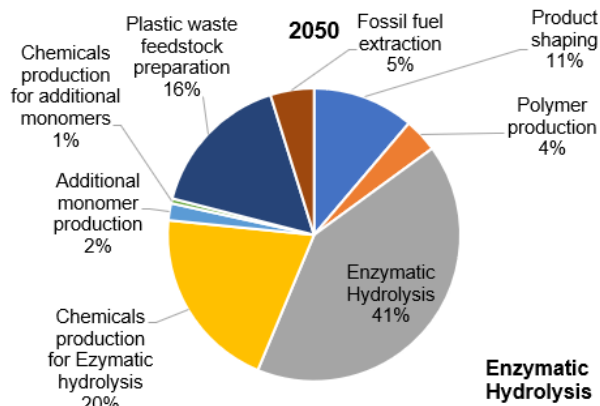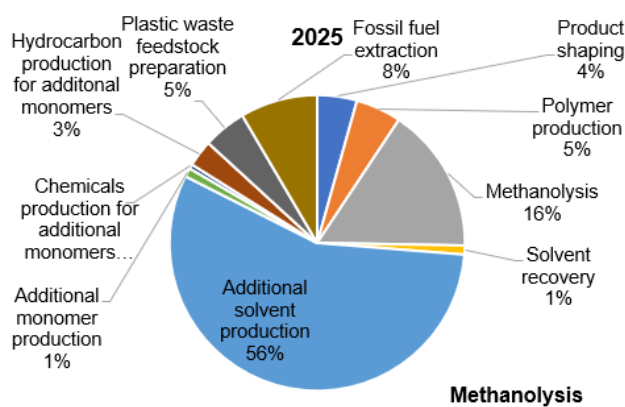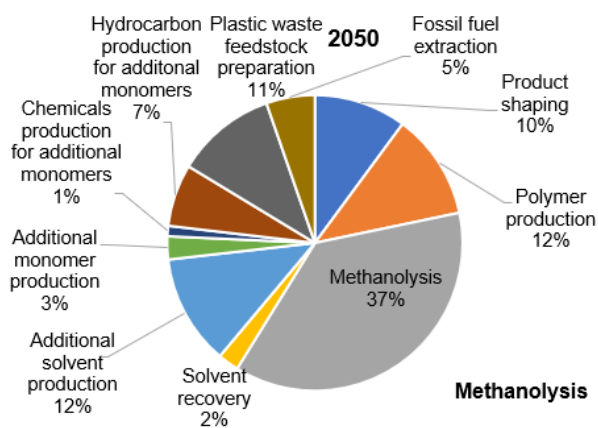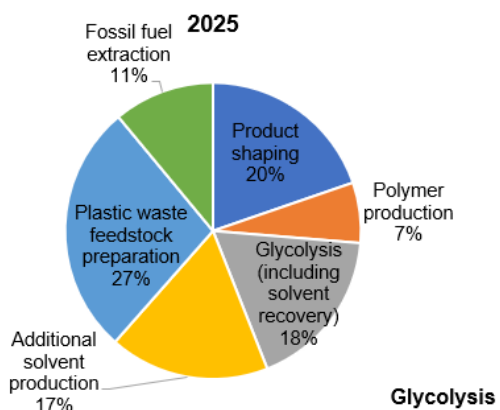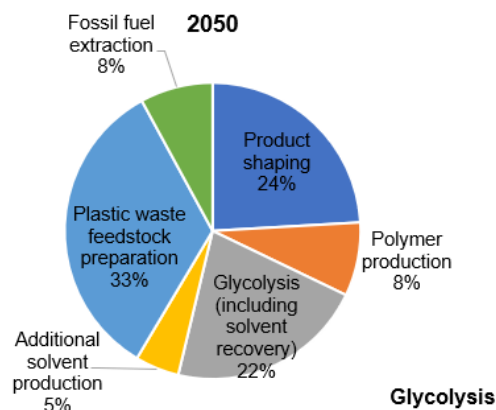

**Supplementary Fig. S7. GHG emission contribution of production stages in 2025 and 2050 in the Extreme scenario of PET depolymerization**

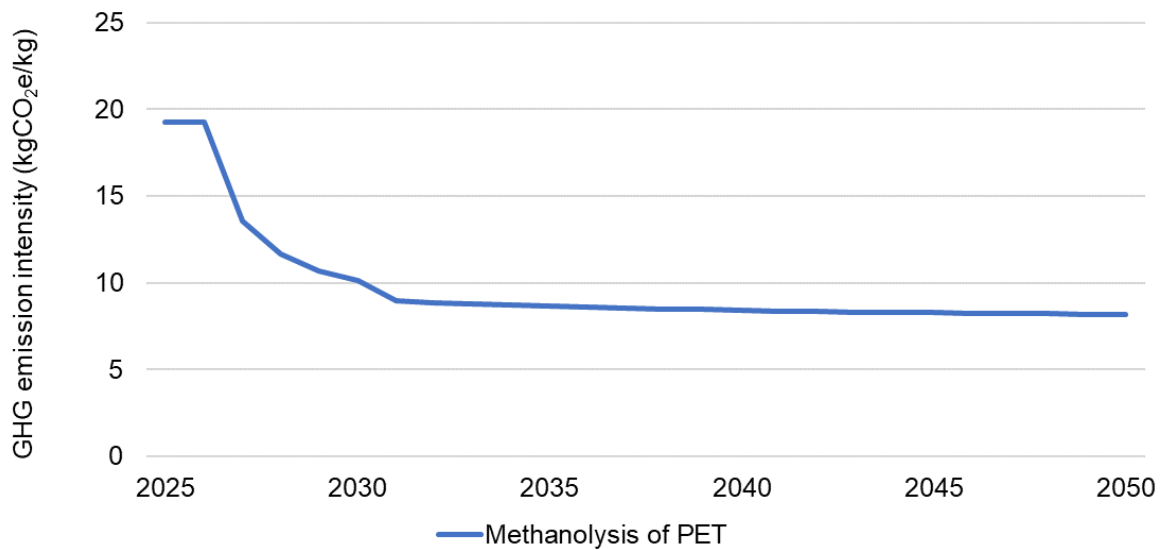

**Supplementary Fig. S8. Changes in GHG emission intensity for PET methanolysis over the modeling horizon in the Realistic scenario (kgCO<sub>2</sub>e/kg)**

*Note: PET exhibits consistent trends and comparable intensity levels across all analyzed scenarios (i.e., Realistic, Ambitious, High ambitious, and Extreme scenarios).*

GHG emission intensity of producing a tonne of recycled PET via depolymerization vs primary production per polymer (kgCO<sub>2</sub>e/kg)

|                      | Solvent production included | Only solvent loss included | Primary production |
|----------------------|-----------------------------|----------------------------|--------------------|
| Glycolysis           | 3.97                        | 3.20                       | 6.54               |
| Enzymatic Hydrolysis |                             | 6.99                       | 6.54               |
| Methanolysis         | 19.28                       | 7.53                       | 6.54               |



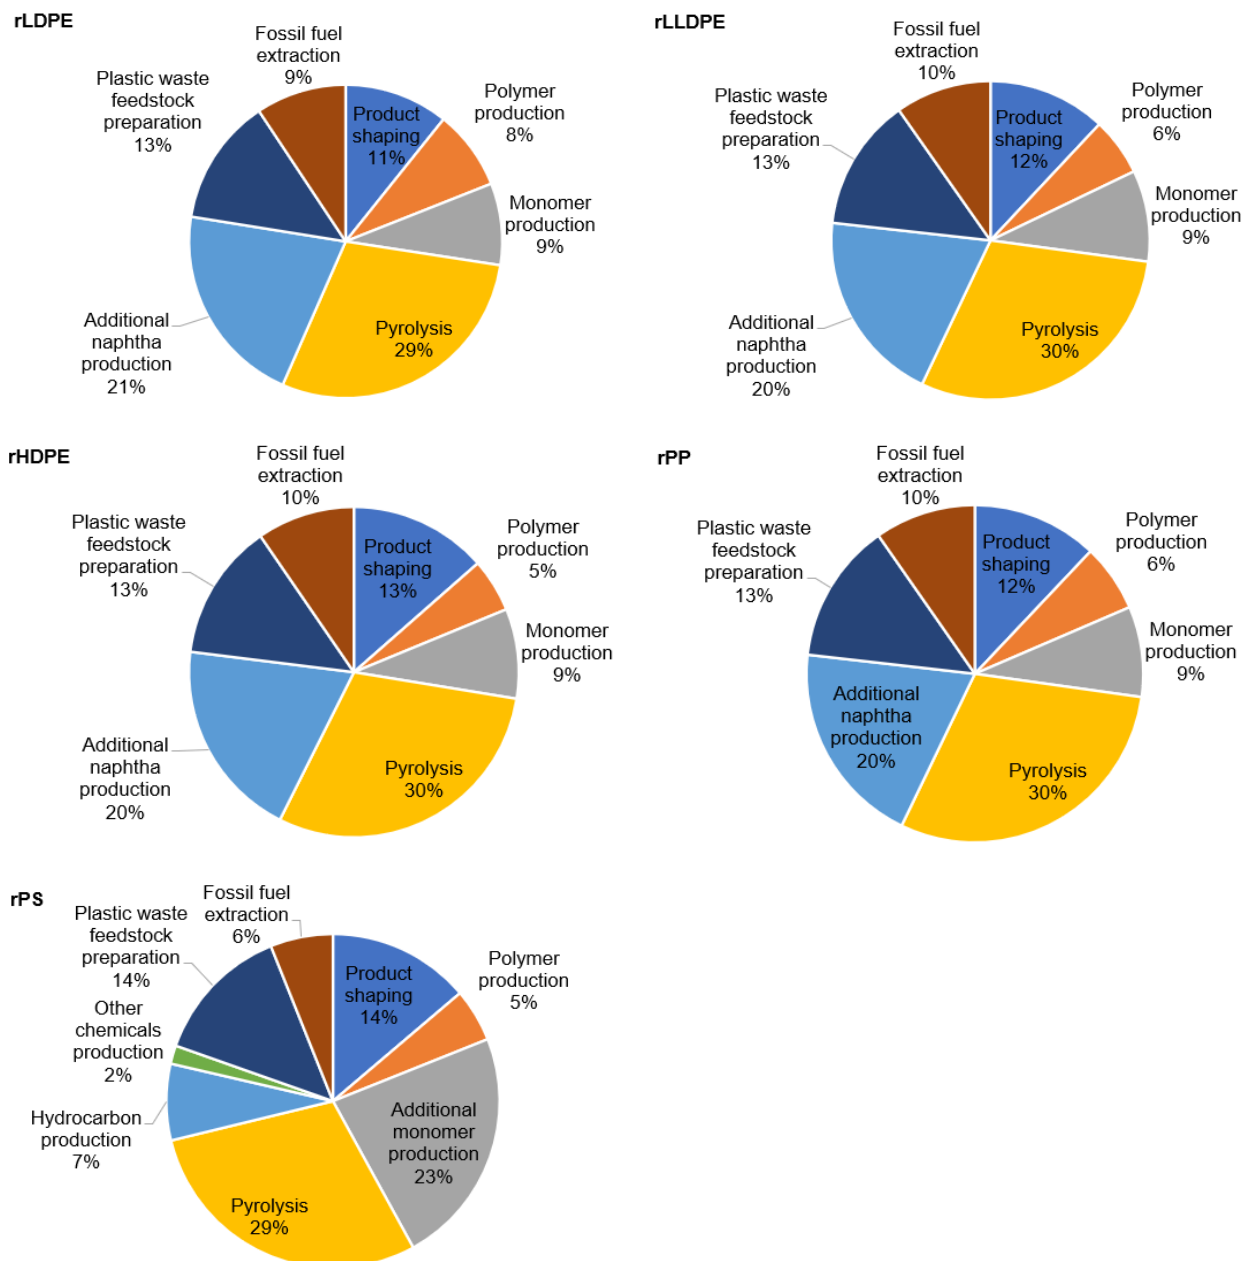

**Supplementary Fig. S9. GHG emission contribution of production stages per polymer in 2050 in the Realistic, Ambitious, High ambitious, and Extreme scenarios of pyrolysis recycling scenarios**

*Note: The changes in contribution shares are negligible across scenarios and years.*

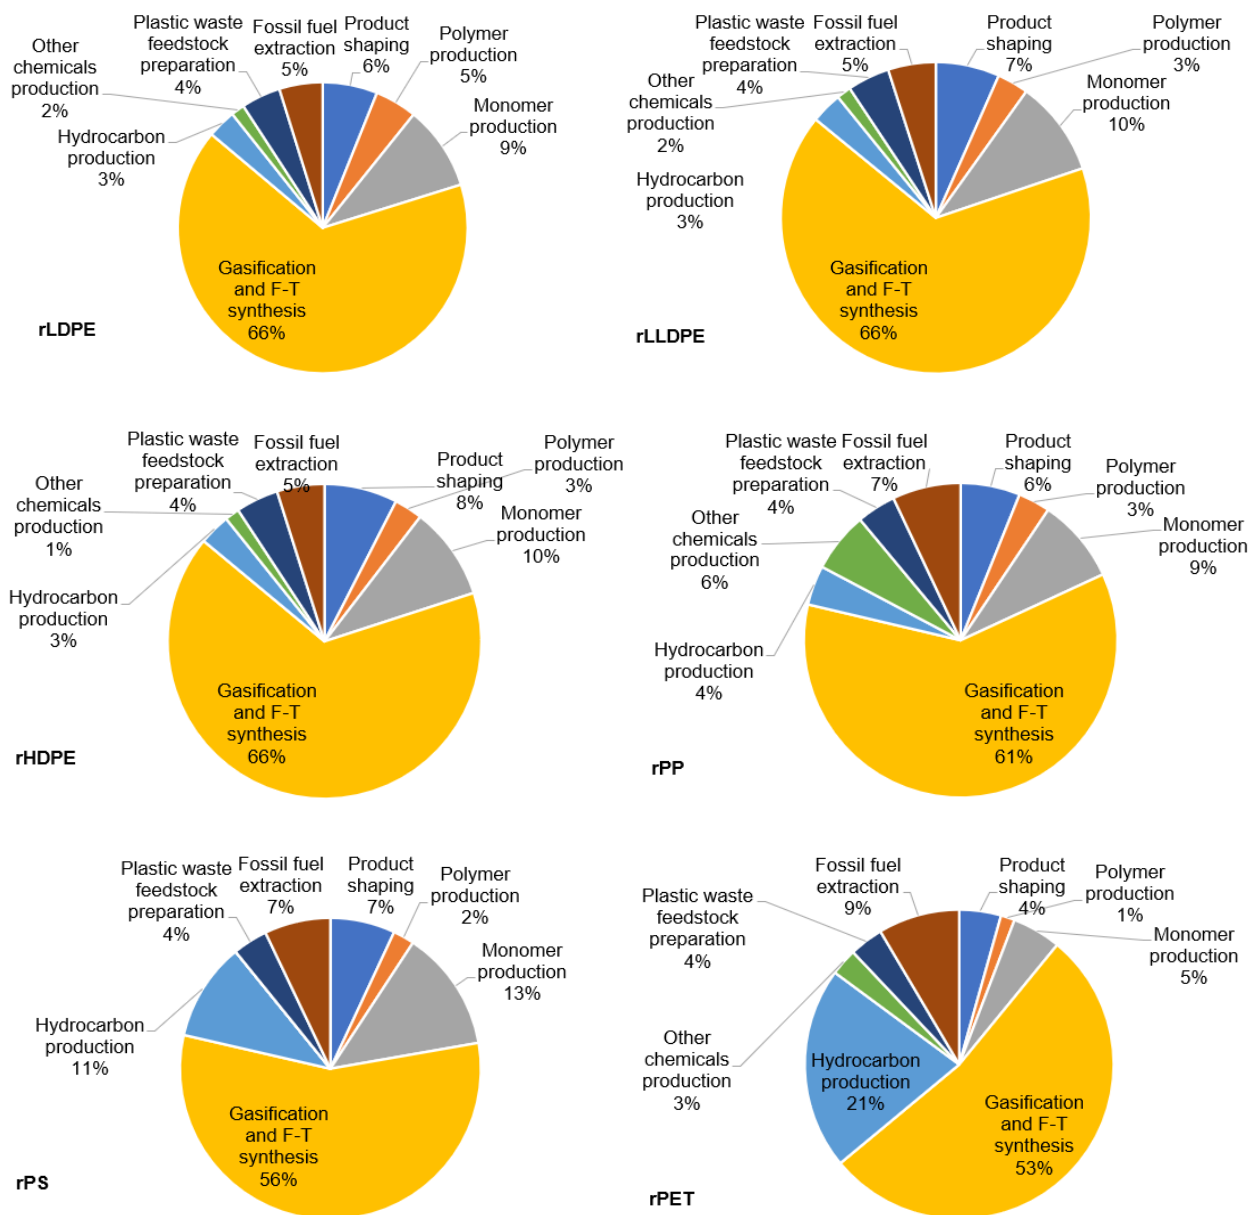

**Supplementary Fig. S10. GHG emission contribution of production stages per polymer in 2050 in the Realistic, Ambitious, High ambitious, and Extreme scenarios of gasification and F-T synthesis scenarios**

*Note: The changes in contribution shares are negligible across scenarios and years.*

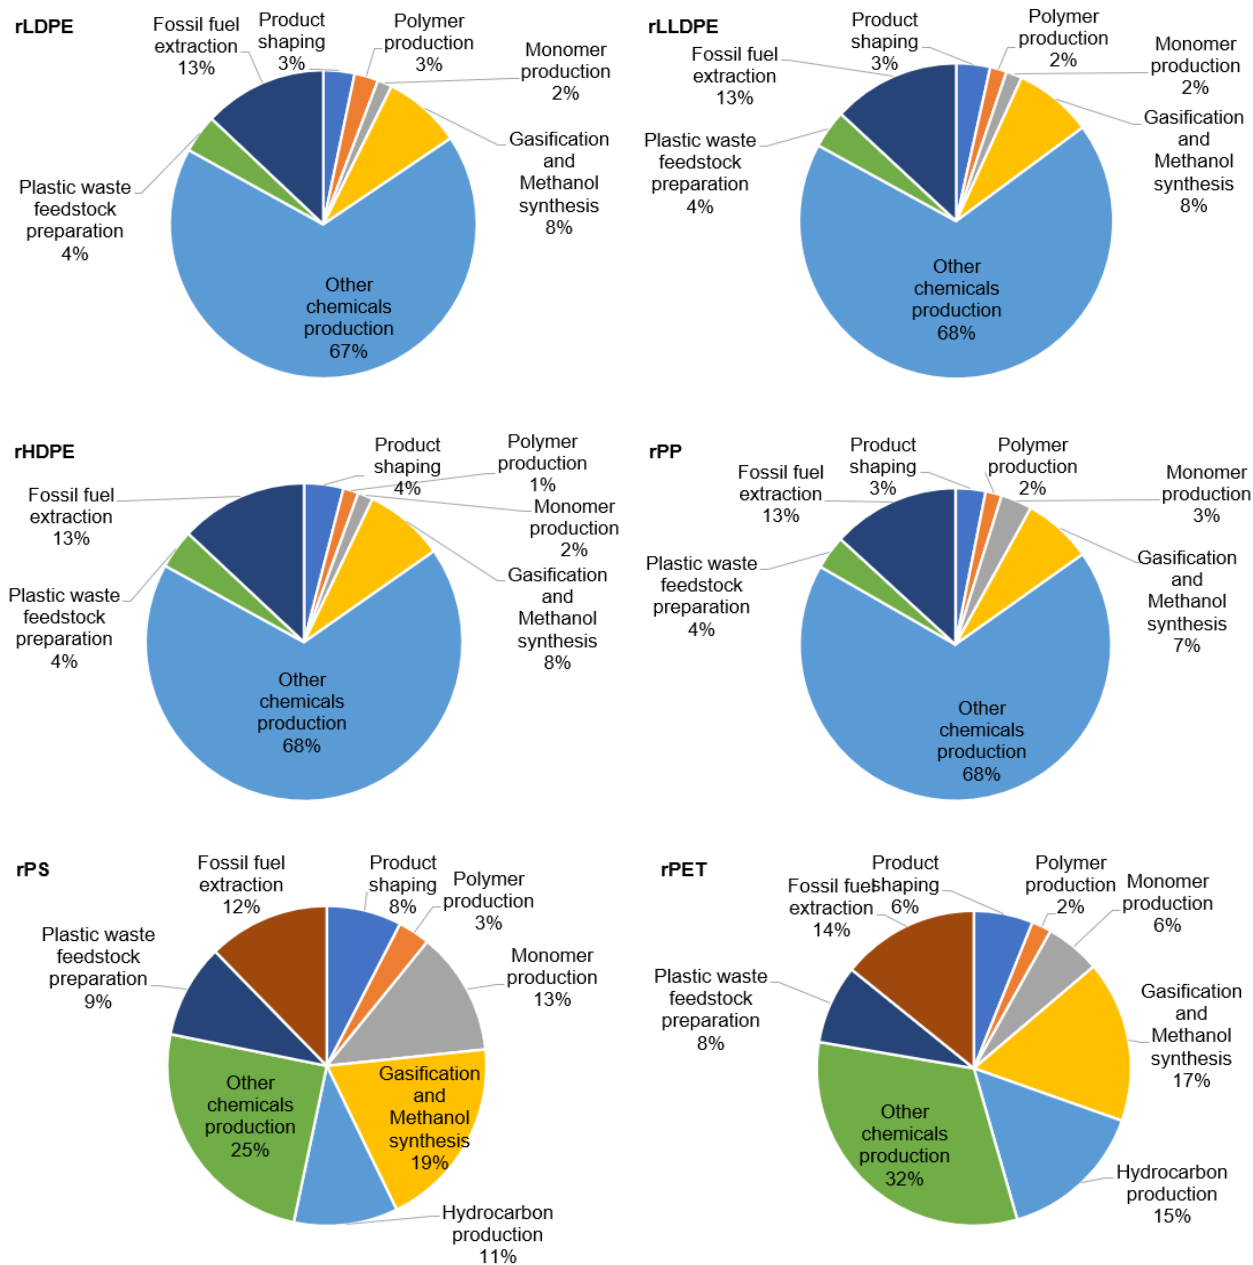

**Supplementary Fig. S11. GHG emission contribution of production stages per polymer in 2050 in the Realistic, Ambitious, High ambitious, and Extreme scenarios of gasification and methanol synthesis scenarios**

*Note: The changes in contribution shares are negligible across scenarios and years.*

## Supplementary Methods

This section details the chemical recycling modeling components within the authors' existing primary plastic production framework. For comprehensive information on primary plastic production modeling for individual polymers, please refer to Karali et al. (1).

### *a. Chemical recycling technologies production value chain and material flow charts*

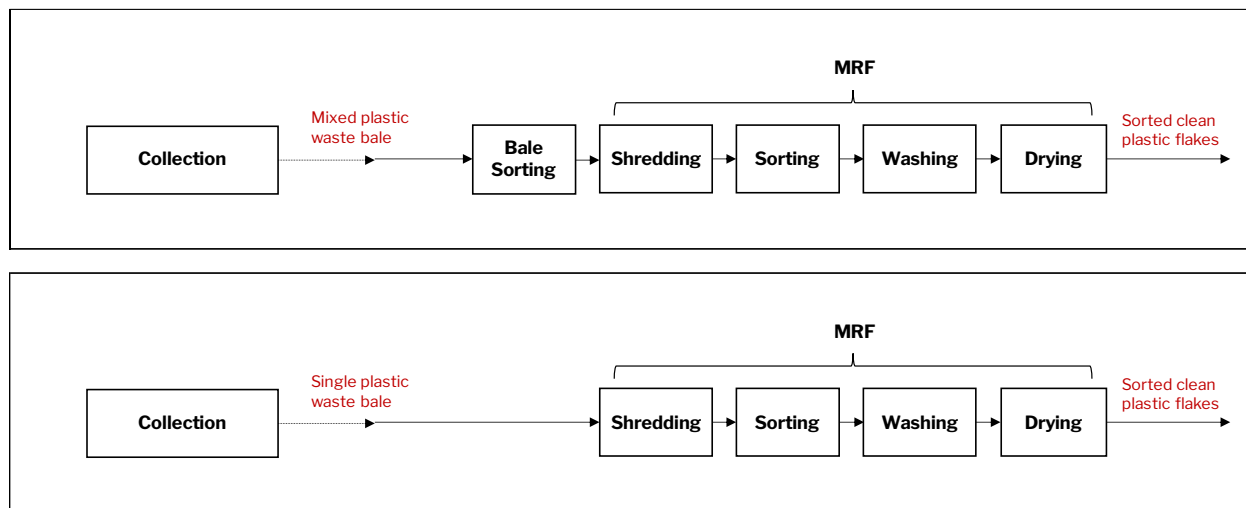

**Supplementary Fig. S12. Plastic Waste Collection and Pretreatment Process Flow for Mixed and Single-Stream Collections**

*Note: This study assumes that mixed plastic collections undergo initial sorting processes before proceeding to chemical recycling technologies.*

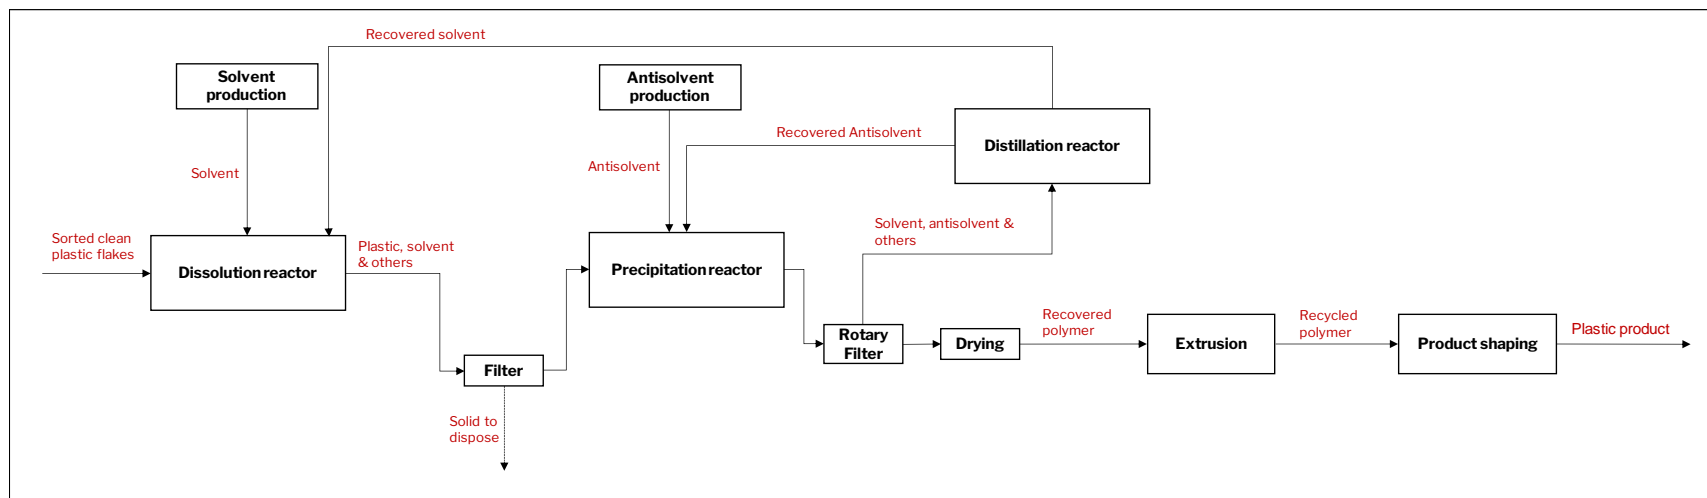

### Supplementary Fig. S13. Solvent-Based Chemical Recycling: Production Value Chain and Material Flow Chart

*Note: Process conditions for solvent-based recycling, including specific solvents and antisolvents used, energy requirements, direct process emissions, and detailed production parameters for solvent and antisolvent manufacturing for each polymer type, are provided in Materials and Methods sections b and c. For polymer-specific product shaping stage details, refer to the primary plastic production modeling in Karali et al. (1).*

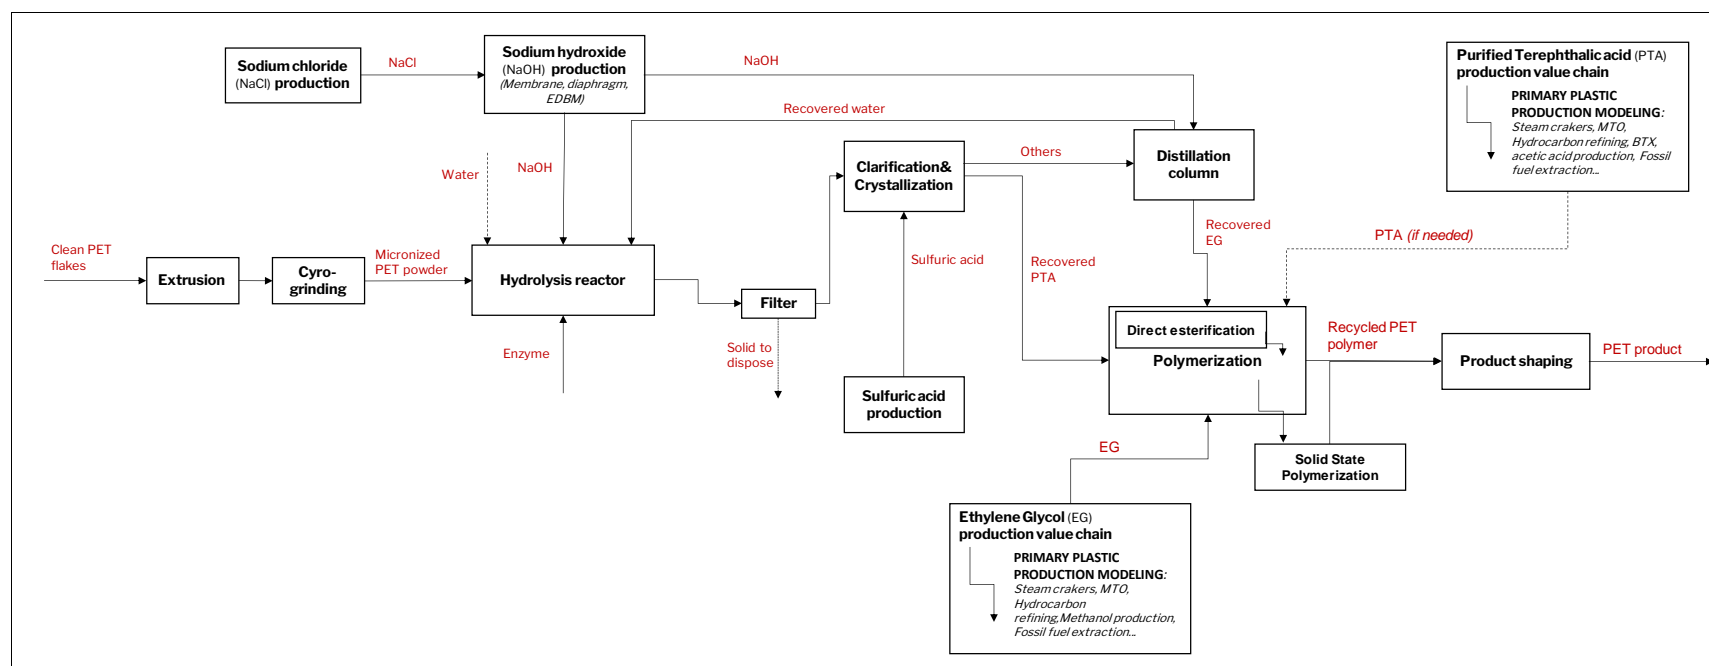

### Supplementary Fig. S14. Polyethylene Terephthalate (PET) Enzymatic Hydrolysis Depolymerization: Production Value Chain and Material Flow Chart

Note: Detailed process conditions for polyethylene terephthalate (PET) enzymatic hydrolysis, including chemical reagents (NaOH, NaCl, and sulfuric acid), energy inputs, direct process emissions, and chemical production parameters are outlined in Materials and Methods sections b and c. Under optimal experimental conditions with minimal contamination, recovered purified terephthalic acid (PTA) is sufficient for producing one tonne of PET. However, real-world conditions may involve material losses throughout the recycling process, including collection and pretreatment stages, and contamination, resulting in lower recovery rates. Primary plastic production modeling details for ethylene glycol (EG), PTA production, PET polymerization, and product shaping are available in Karali et al. (1).

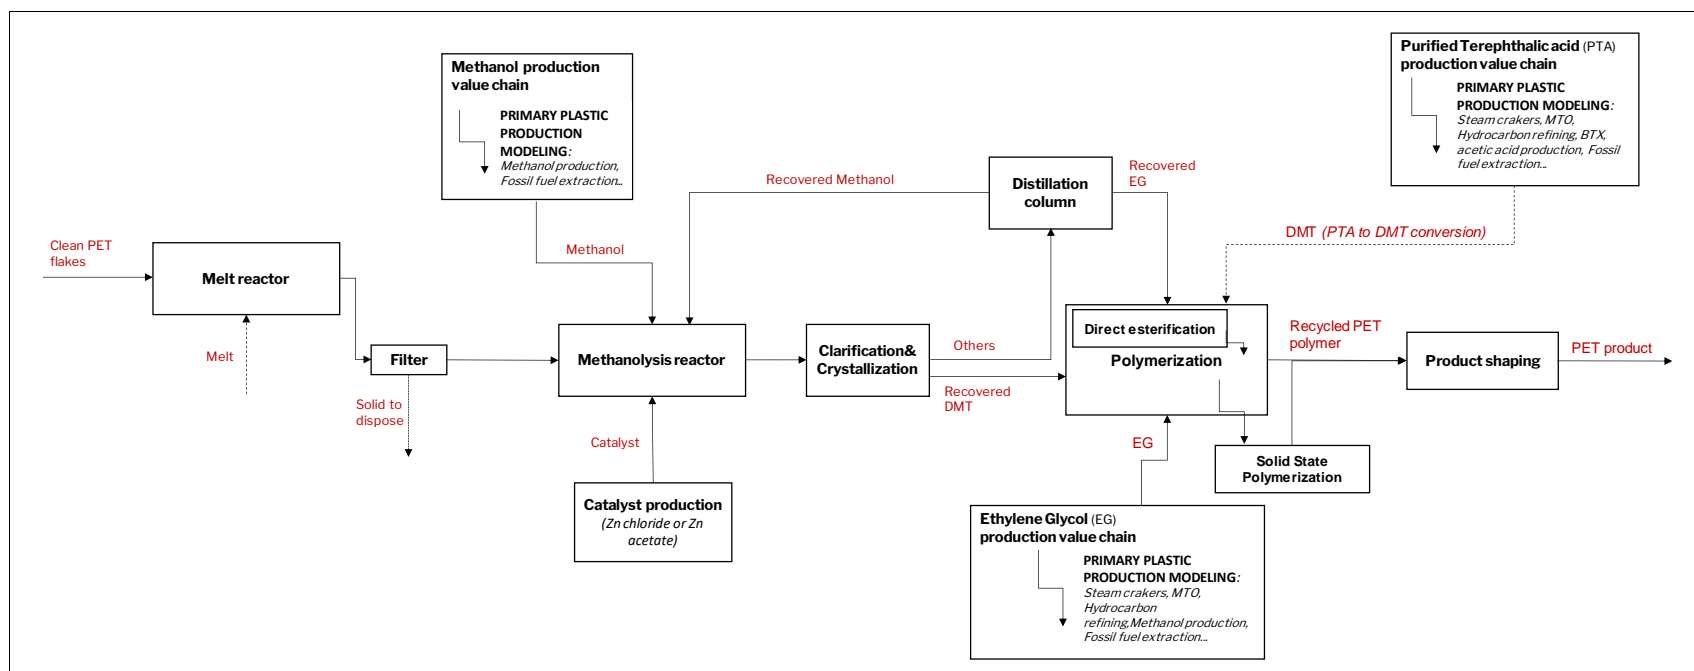

### Supplementary Fig. S15. PET Methanolysis Depolymerization: Production Value Chain and Material Flow Chart

Note: Methanolysis process conditions, including chemical agents, energy requirements, direct process emissions, and catalyst production details (zinc (Zn) chloride and Zn acetate) are detailed in Materials and Methods sections b and c. Under ideal experimental conditions with minimal contamination, recovered dimethyl terephthalate (DMT) is adequate for producing one tonne of PET. However, real-world applications may experience material losses at each recycling stage, including preprocessing steps, and contamination, leading to reduced recovery rates. When recovery rates are insufficient, additional DMT is sourced from primary plastic production pathways. For comprehensive details on EG, PTA, and methanol production parameters, as well as PET polymerization and product shaping processes, refer to Karali et al. (1).

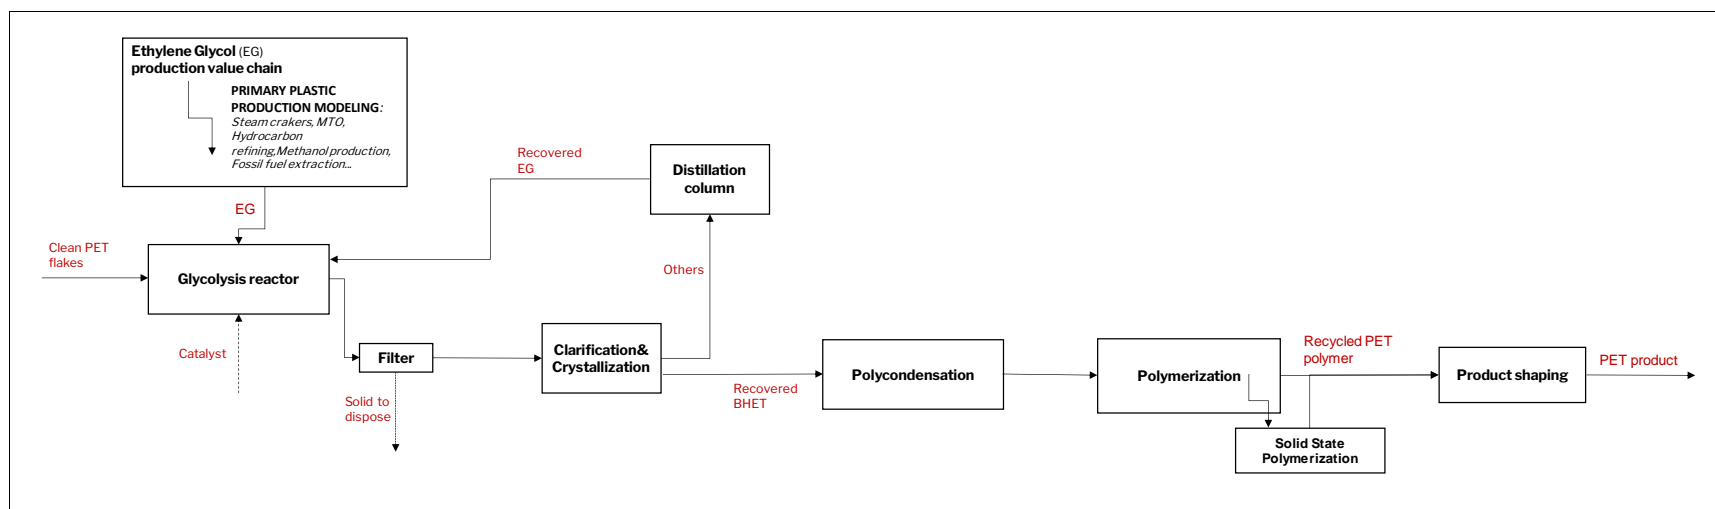

### Supplementary Fig. S16. PET Glycolysis Depolymerization: Production Value Chain and Material Flow Chart

Note: Glycolysis process conditions are detailed in Materials and Methods sections b and c. Under controlled experimental conditions with minimal contamination, recovered bis(2-hydroxyethyl) terephthalate (BHET) is sufficient for producing one tonne of PET. However, practical applications may involve material losses throughout the recycling chain, including collection and pretreatment operations, and contamination, resulting in reduced recovery efficiencies. When recovery rates are inadequate, supplementary BHET is obtained through primary plastic production routes. Detailed parameters for EG and methanol production, PET polymerization, and product shaping are available in Karali et al. (1).



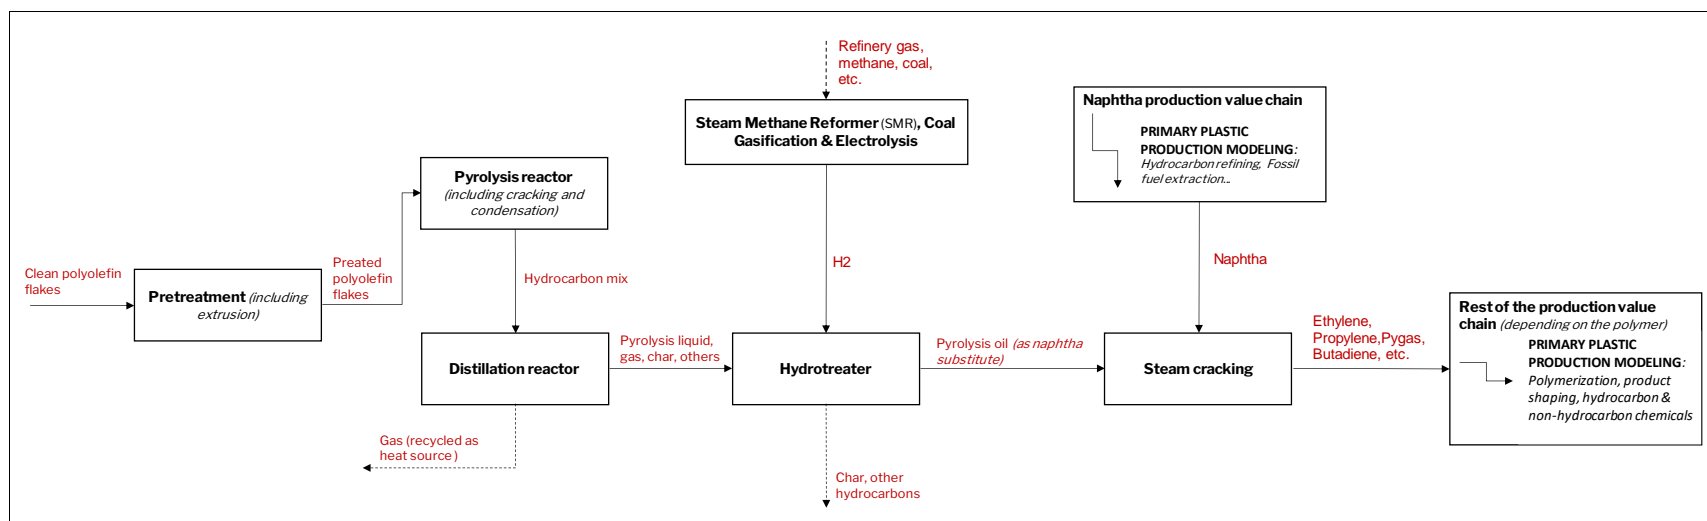

**Supplementary Fig. S17. Polyolefin Pyrolysis: Production Value Chain and Material Flow Chart**

Note: Pyrolysis process conditions, including energy inputs and direct process emissions, are specified in Materials and Methods sections b and c. For detailed parameters of subsequent production stages and hydrogen (H<sub>2</sub>) production processes, refer to the primary plastic production modeling framework in Karali et al. (1).

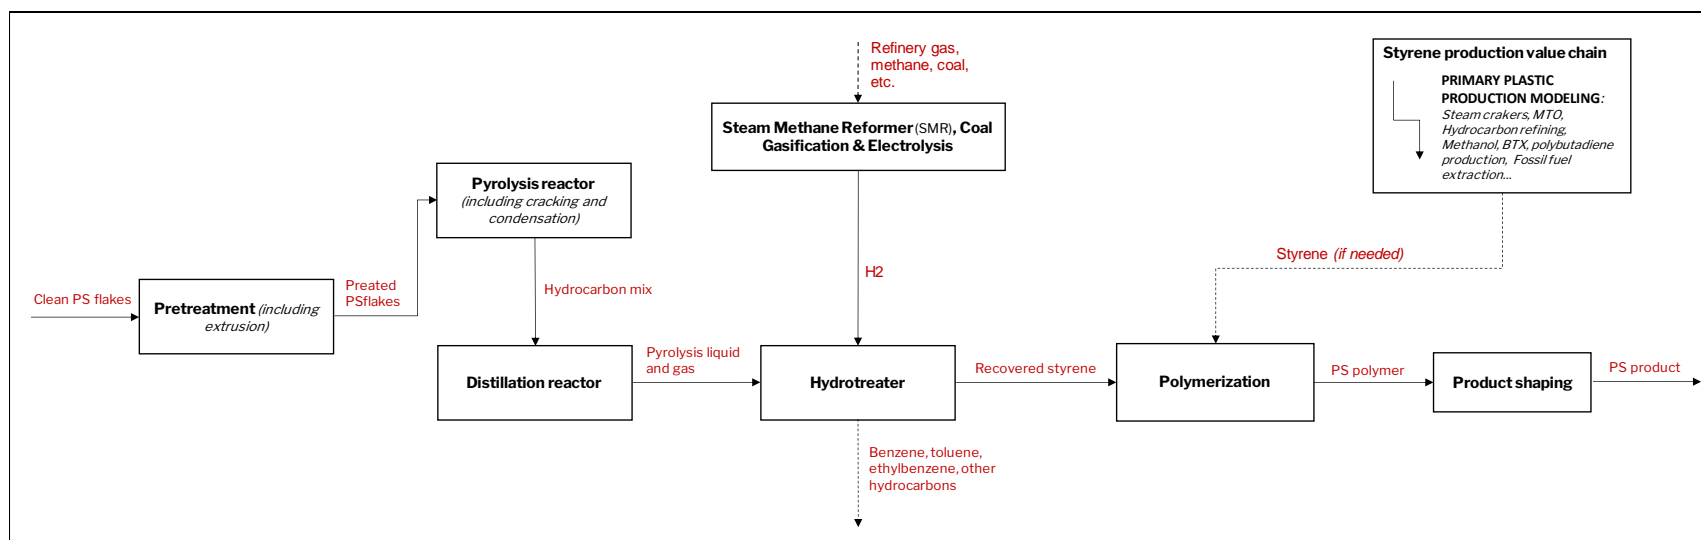

### Supplementary Fig. S18. Polystyrene (PS) Pyrolysis: Production Value Chain and Material Flow Chart

Note: PS pyrolysis process conditions, including energy requirements and direct process emissions, are outlined in Materials and Methods section b. Under optimal experimental conditions with minimal contamination, recovered styrene monomer is sufficient for producing one tonne of PS. However, real-world operations may experience material losses throughout the recycling process, including preprocessing stages, and contamination, leading to reduced recovery yields. When recovery rates are insufficient, additional styrene is sourced from primary plastic production pathways. Comprehensive details on styrene and hydrogen production parameters, polymerization processes, and product shaping are available in Karali et al. (1).

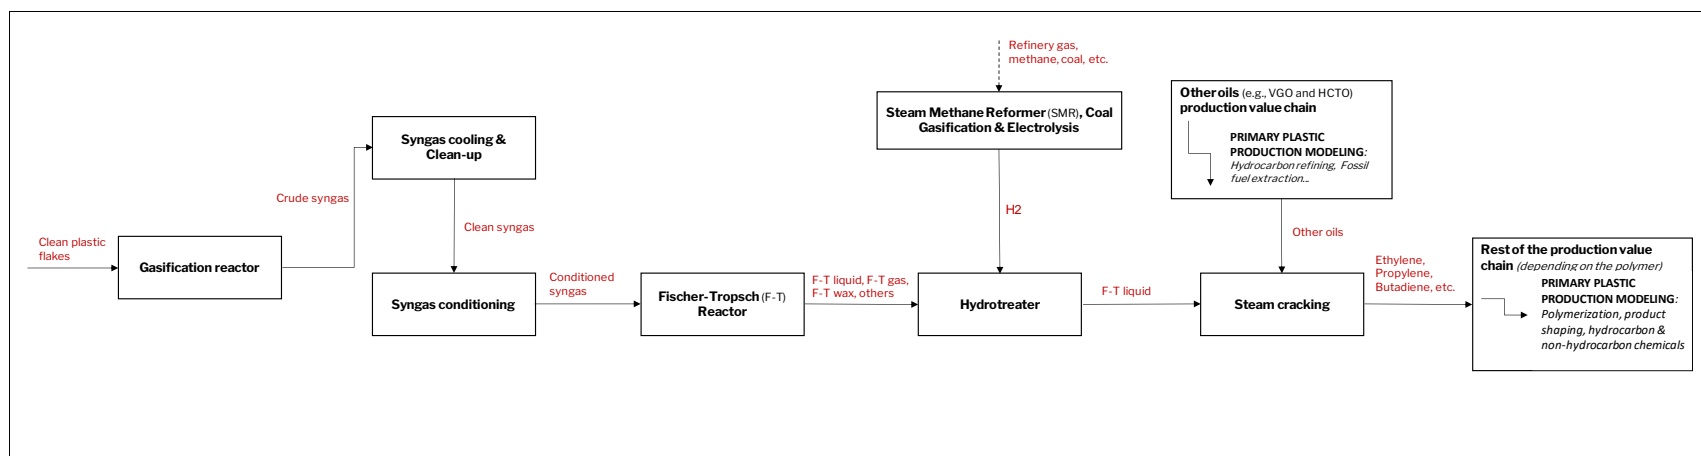

**Supplementary Fig. S19. Gasification with Fischer-Tropsch (F-T) Synthesis: Production Value Chain and Material Flow Chart**

Note: Gasification F-T synthesis process conditions, including energy demands and direct process emissions, are detailed in Materials and Methods section b. For comprehensive information on hydrogen production parameters and subsequent production value chain stages, refer to the primary plastic production modeling in Karali et al. (1).

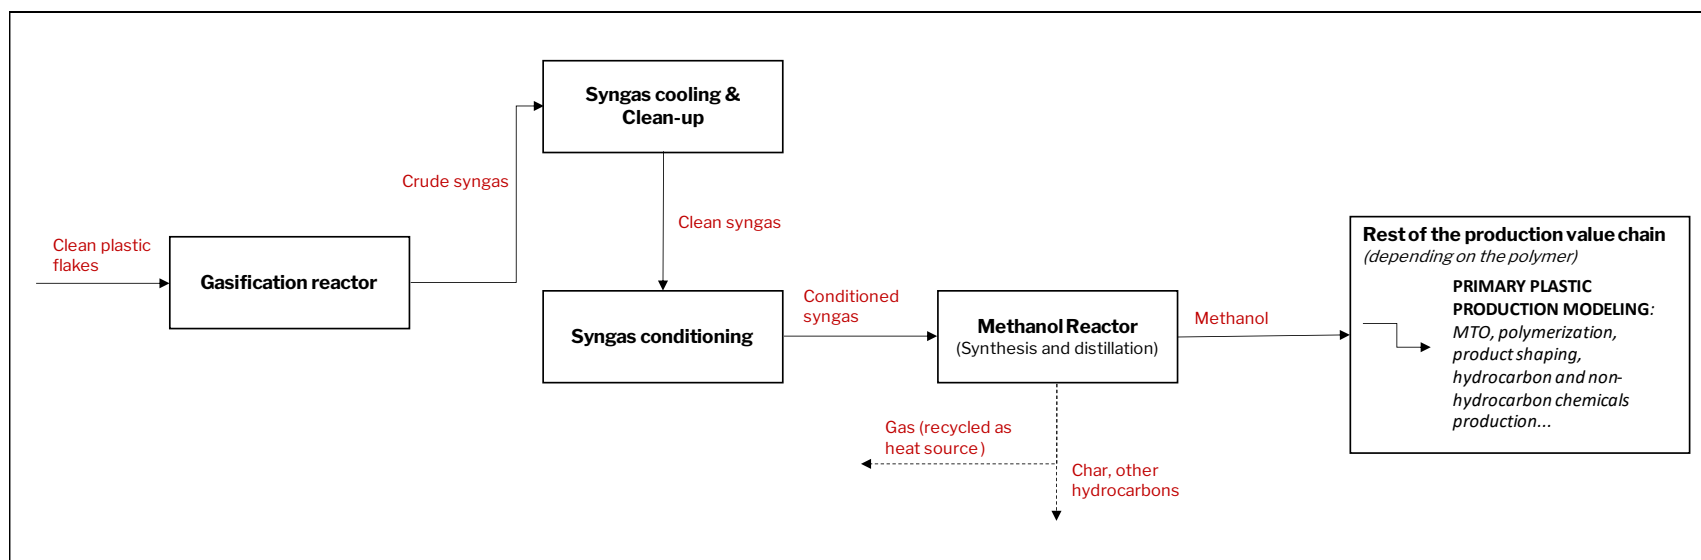

**Supplementary Fig. S20. Gasification with Methanol Synthesis: Production Value Chain and Material Flow Chart**

*Note: Gasification methanol synthesis process conditions, including energy requirements and direct process emissions, are specified in Materials and Methods section b. Detailed parameters for subsequent production value chain stages are available in the primary plastic production modeling framework presented in Karali et al. (1).*

***b. Chemical recycling technologies parameter set and assumptions used in the modeling***

The modeling and chemical scenario results are based on assumptions summarized in this section.

For solvent-based recycling, we employ the most commonly applied solvent and antisolvent pairs identified in the literature. Most studies on solvent-based recycling of polyethylene (PE), polypropylene (PP), and polyethylene terephthalate (PET) report a polymer concentration of 5% w/v from experimental investigations (2), indicating 1 gram of polymer dissolved in 20 ml of solvent. However, some studies report higher concentrations of 10% w/v or 15% w/v (3). This study applies a 10% w/v concentration with a  $\pm 30\%$  sensitivity range for uncertainty analysis. For polyvinyl chloride (PVC), polystyrene (PS), and acrylonitrile butadiene styrene (ABS), polymer concentrations are directly adopted from the references listed in the corresponding tables, with the same  $\pm 30\%$  sensitivity range applied. Detailed production information for solvents and antisolvents used in solvent-based recycling is provided in subsection c.

In this paper, "loss" is defined as the difference between the initial weight of the plastic feedstock and the weight of the recovered products after processing.

**Supplementary Table S21. Modeling Parameters and Assumptions Applied in Solvent-Based LDPE/LLDPE Recycling**

| Polymer                                                                  | LDPE/LLDPE    |                   |       |
|--------------------------------------------------------------------------|---------------|-------------------|-------|
|                                                                          |               | Sensitivity range |       |
| Contamination level                                                      | <12%          |                   | (3)   |
| MRF loss rate                                                            | 5%            | 3-25%             |       |
| Recycling polymer recovery rate                                          | 98.9%         | 92-100%           | (2,3) |
| Recycling solvent/non-solvent                                            | Xylene/Hexane |                   |       |
| Recycling solvent/non-solvent amount (ml per gr waste polymer flake)     | 10ml/30ml     | ±30%              |       |
| Recycling solvent/non-solvent loss rate                                  | 3%            | 0-25%             |       |
| Material quality loss each recycling cycle                               | 10%           |                   |       |
|                                                                          |               |                   | (3)   |
| Energy consumption (GJ/tonne)                                            |               |                   |       |
| Collection (GJ/tonne plastic bale)                                       | 0.87          | ±20%              | (4–6) |
| MRF (incl., shredding, sorting, washing, drying) (GJ/tonne plastic bale) | 3.84          |                   |       |
| Electricity (%)                                                          | 98.5%         |                   |       |
| Natural gas (%)                                                          | 1.5%          |                   |       |
| Dissolution/precipitation process (GJ/tonne recycled polymer)            | 0.6           | ±20%              | (5,6) |
| Electricity (%)                                                          | 90.0%         |                   |       |
| Natural gas (%)                                                          | 10.0%         |                   |       |
| Solvent recovery (GJ/tonne recycled polymer)                             | 1.0           | ±20%              |       |
| Electricity (%)                                                          | 2.5%          |                   |       |
| Natural gas (%)                                                          | 8.5%          |                   |       |
| Steam (%)                                                                | 89.0%         |                   |       |
| Non-solvent recovery (GJ/tonne recycled polymer)                         | 1.0           | ±20%              |       |
| Electricity (%)                                                          | 2.5%          |                   |       |
| Natural gas (%)                                                          | 8.5%          |                   |       |
| Steam (%)                                                                | 89.0%         |                   |       |

|                                             |                              |  |     |
|---------------------------------------------|------------------------------|--|-----|
| Extrusion (GJ/tonne recycled polymer)       | 5.30 for LDPE/4.72 for LLDPE |  | (1) |
| <b>Process emissions (% of used amount)</b> |                              |  |     |
| Xylene                                      | 0.005%                       |  | (3) |
| Hexane                                      | 0.005%                       |  |     |

Note: LDPE = low-density polyethylene, LLDPE = linear low-density polyethylene

### Supplementary Table S22. Modeling Parameters and Assumptions Applied in Solvent-Based HDPE Recycling

| Polymer                                                                  | HDPE          |                   |       |
|--------------------------------------------------------------------------|---------------|-------------------|-------|
|                                                                          |               | Sensitivity range |       |
| Contamination level                                                      | <10%          |                   | (3)   |
| MRF loss rate                                                            | 10%           | 5-25%             |       |
| Recycling polymer recovery rate                                          | 97.7%         | 92-100%           |       |
| Recycling solvent/non-solvent                                            | Xylene/Hexane |                   | (2,3) |
| Recycling solvent/non-solvent amount (ml per gr waste polymer flake)     | 10ml/30ml     | ±30%              |       |
| Recycling solvent/non-solvent loss rate                                  | 3%            | 0-25%             |       |
| Material quality loss each recycling cycle                               | 6%            |                   | (3)   |
| Energy consumption (GJ/tonne)                                            |               |                   |       |
| Collection (GJ/tonne plastic bale)                                       | 0.87          | ±20%              | (4-6) |
| MRF (incl., shredding, sorting, washing, drying) (GJ/tonne plastic bale) | 3.84          |                   |       |
| Electricity (%)                                                          | 98.5%         |                   |       |
| Natural gas (%)                                                          | 1.5%          |                   |       |
| Dissolution/precipitation process (GJ/tonne recycled polymer)            | 0.6           | ±20%              | (5,6) |
| Electricity (%)                                                          | 90.0%         |                   |       |
| Natural gas (%)                                                          | 10.0%         |                   |       |
| Solvent recovery (GJ/tonne recycled polymer)                             | 1.0           | ±20%              |       |
| Electricity (%)                                                          | 2.5%          |                   |       |
| Natural gas (%)                                                          | 8.5%          |                   |       |
| Steam (%)                                                                | 89.0%         |                   |       |
| Non-solvent recovery (GJ/tonne recycled polymer)                         | 1.0           | ±20%              |       |
| Electricity (%)                                                          | 2.5%          |                   |       |
| Natural gas (%)                                                          | 8.5%          |                   |       |
| Steam (%)                                                                | 89.0%         |                   |       |
| Extrusion (GJ/tonne recycled polymer)                                    | 4.12          |                   | (1)   |
| Process emissions (% of used amount)                                     |               |                   |       |
| Xylene                                                                   | 0.005%        |                   | (3)   |
| Hexane                                                                   | 0.005%        |                   |       |

### Supplementary Table S23. Modeling Parameters and Assumptions Applied in Solvent-Based PP Recycling

| Polymer                                                              | PP            |                          |       |
|----------------------------------------------------------------------|---------------|--------------------------|-------|
|                                                                      |               | <b>Sensitivity range</b> |       |
| Contamination level                                                  | <12%          |                          | (3)   |
| MRF loss rate                                                        | 15.00%        | 8-25%                    |       |
| Recycling polymer recovery rate                                      | 98.6%         | 92-100%                  | (2,3) |
| Recycling solvent/non-solvent                                        | Xylene/Hexane |                          | (2,3) |
| Recycling solvent/non-solvent amount (ml per gr waste polymer flake) | 10ml/30ml     | ±30%                     |       |
| Recycling solvent/non-solvent loss rate                              | 3%            | 0-25%                    | (3)   |
| Material quality loss each recycling cycle                           | 10%           |                          |       |

| Energy consumption (GJ/tonne)                                            |        |      |       |
|--------------------------------------------------------------------------|--------|------|-------|
| Collection (GJ/tonne plastic bale)                                       | 0.87   | ±20% | (4–6) |
| MRF (incl., shredding, sorting, washing, drying) (GJ/tonne plastic bale) | 3.84   |      |       |
| Electricity (%)                                                          | 98.5%  |      |       |
| Natural gas (%)                                                          | 1.5%   |      |       |
| Dissolution/precipitation process (GJ/tonne recycled polymer)            | 0.6    | ±20% | (5,6) |
| Electricity (%)                                                          | 90.0%  |      |       |
| Natural gas (%)                                                          | 10.0%  |      |       |
| Solvent recovery (GJ/tonne recycled polymer)                             | 1      | ±20% |       |
| Electricity (%)                                                          | 2.5%   |      |       |
| Natural gas (%)                                                          | 8.5%   |      |       |
| Steam (%)                                                                | 89.0%  |      |       |
| Non-solvent recovery (GJ/tonne recycled polymer)                         | 1      | ±20% |       |
| Electricity (%)                                                          | 2.5%   |      |       |
| Natural gas (%)                                                          | 8.5%   |      |       |
| Steam (%)                                                                | 89.0%  |      |       |
| Extrusion (GJ/tonne recycled polymer)                                    | 5.51   |      | (1)   |
| Process emissions (% of used amount)                                     |        |      |       |
| Xylene                                                                   | 0.005% |      | (3)   |
| Hexane                                                                   | 0.005% |      |       |

**Supplementary Table S24. Modeling Parameters and Assumptions Applied in Solvent-Based PET Recycling**

| Polymer                                                                  | PET                     |                   |       |
|--------------------------------------------------------------------------|-------------------------|-------------------|-------|
|                                                                          |                         | Sensitivity range |       |
| Contamination level                                                      | <4%                     |                   | (3)   |
| MRF loss rate                                                            | 19.00%                  | 7-37%             | (7)   |
| Recycling polymer recovery rate                                          | 98.8%                   | 92-100%           | (2-4) |
| Recycling solvent/non-solvent                                            | Benzyl alcohol/Methanol |                   |       |
| Recycling solvent/non-solvent amount (ml per gr waste polymer flake)     | 10ml/30ml               | ±30%              |       |
| Recycling solvent/non-solvent loss rate                                  | 2%                      | 0-25%             |       |
| Material quality loss each recycling cycle                               | 6%                      |                   |       |
| (3)                                                                      |                         |                   |       |
| Energy consumption (GJ/tonne)                                            |                         |                   |       |
| Collection (GJ/tonne plastic bale)                                       | 0.87                    | ±20%              | (4-6) |
| MRF (incl., shredding, sorting, washing, drying) (GJ/tonne plastic bale) | 3.84                    |                   |       |
| Electricity (%)                                                          | 98.5%                   |                   |       |
| Natural gas (%)                                                          | 1.5%                    |                   |       |
| Dissolution/precipitation process (GJ/tonne recycled polymer)            | 0.6                     | ±20%              | (5,6) |
| Electricity (%)                                                          | 90.0%                   |                   |       |
| Natural gas (%)                                                          | 10.0%                   |                   |       |
| Solvent recovery (GJ/tonne recycled polymer)                             | 1                       | ±20%              |       |
| Electricity (%)                                                          | 1.0%                    |                   |       |
| Natural gas (%)                                                          | 3.0%                    |                   |       |
| Steam (%)                                                                | 96.0%                   |                   |       |
| Non-solvent recovery (GJ/tonne recycled polymer)                         | 1                       | ±20%              |       |
| Electricity (%)                                                          | 1.0%                    |                   |       |
| Natural gas (%)                                                          | 3.0%                    |                   |       |
| Steam (%)                                                                | 96.0%                   |                   |       |
| Extrusion (GJ/tonne recycled polymer)                                    | 5.28                    |                   | (1)   |

| <b>Process emissions (% of used amount)</b> |        |  |     |
|---------------------------------------------|--------|--|-----|
| Benzyl alcohol                              | 0.005% |  | (3) |
| Methanol                                    | 0.005% |  |     |

**Supplementary Table S25. Modeling Parameters and Assumptions Applied in Solvent-Based PS Recycling**

| Polymer                                                                  | PS            |                   |                           |
|--------------------------------------------------------------------------|---------------|-------------------|---------------------------|
|                                                                          |               | Sensitivity range |                           |
| Contamination level                                                      | <12%          |                   | Assumed as in LDPE and PP |
| MRF loss rate                                                            | 15%           | 8-40%             | (8,9)                     |
| Recycling polymer recovery rate                                          | 94.7%         | 92-100%           | (2,5)                     |
| Recycling solvent/non-solvent                                            | DCM/Methanol* |                   |                           |
| Recycling solvent/non-solvent amount (ml per gr waste polymer flake)     | 20ml/10ml     | ±30%              |                           |
| Recycling solvent/non-solvent loss rate                                  | 3%            | 0-25%             |                           |
| Material quality loss each recycling cycle                               | 10%           |                   | Assumed as in LDPE and PP |
| Energy consumption (GJ/tonne)                                            |               |                   |                           |
| Collection (GJ/tonne plastic bale)                                       | 0.87          | ±20%              | (4-6)                     |
| MRF (incl., shredding, sorting, washing, drying) (GJ/tonne plastic bale) | 3.84          |                   |                           |
| Electricity (%)                                                          | 98.5%         |                   |                           |
| Natural gas (%)                                                          | 1.5%          |                   |                           |
| Dissolution/precipitation process (GJ/tonne recycled polymer)            | 0.6           | ±20%              | (5,6)                     |
| Electricity (%)                                                          | 90.0%         |                   |                           |
| Natural gas (%)                                                          | 10.0%         |                   |                           |
| Solvent recovery (GJ/tonne recycled polymer)                             | 1             | ±20%              |                           |
| Electricity (%)                                                          | 2.0%          |                   |                           |
| Natural gas (%)                                                          | 7.0%          |                   |                           |
| Steam (%)                                                                | 91.0%         |                   |                           |
| Non-solvent recovery (GJ/tonne recycled polymer)                         | 1             | ±20%              |                           |
| Electricity (%)                                                          | 2.0%          |                   |                           |
| Natural gas (%)                                                          | 7.0%          |                   |                           |
| Steam (%)                                                                | 91.0%         |                   |                           |
| Extrusion (GJ/tonne recycled polymer)                                    | 6.4           |                   | (1)                       |
| Process emissions (% of used amount)                                     |               |                   |                           |
| DCM*                                                                     | 0.005%        |                   | Assumed as in PEs and PP  |
| Methanol                                                                 | 0.005%        |                   | Assumed as in PEs and PP  |

Note: DCM - Dichloromethane

**Supplementary Table S26. Modeling Parameters and Assumptions Applied in Solvent-Based ABS Recycling**

| Polymer                         | ABS           |                   |                           |
|---------------------------------|---------------|-------------------|---------------------------|
|                                 |               | Sensitivity range |                           |
| Contamination level             | <12%          |                   | Assumed as in LDPE and PP |
| MRF loss rate                   | 17%           | 8-40%             | (6)                       |
| Recycling polymer recovery rate | 81.0%         | 72-90%            |                           |
| Recycling solvent/non-solvent   | Acetone/Water |                   |                           |



|                                                                          |            |       |                          |
|--------------------------------------------------------------------------|------------|-------|--------------------------|
| Recycling solvent/non-solvent amount (ml per gr waste polymer flake)     | 20ml/8.3ml | ±30%  |                          |
| Recycling solvent/non-solvent loss rate                                  | 3%         | 0-25% |                          |
| Material quality loss each recycling cycle                               | 10%        |       |                          |
| Energy consumption (GJ/tonne)                                            |            |       |                          |
| Collection (GJ/tonne plastic bale)                                       | 0.87       | ±20%  | (4-6)                    |
| MRF (incl., shredding, sorting, washing, drying) (GJ/tonne plastic bale) | 3.84       |       |                          |
| Electricity (%)                                                          | 98.5%      |       |                          |
| Natural gas (%)                                                          | 1.5%       |       |                          |
| Dissolution/precipitation process (GJ/tonne recycled polymer)            | 0.6        | ±20%  | (5,6)                    |
| Electricity (%)                                                          | 90.0%      |       |                          |
| Natural gas (%)                                                          | 10.0%      |       |                          |
| Solvent recovery (GJ/tonne recycled polymer)                             | 1          |       |                          |
| Electricity (%)                                                          | 2.0%       | ±20%  |                          |
| Natural gas (%)                                                          | 7.0%       |       |                          |
| Steam (%)                                                                | 91.0%      |       |                          |
| Non-solvent recovery (GJ/tonne recycled polymer)                         | 1          |       |                          |
| Electricity (%)                                                          | 2.0%       | ±20%  |                          |
| Natural gas (%)                                                          | 7.0%       |       |                          |
| Steam (%)                                                                | 91.0%      |       |                          |
| Extrusion (GJ/tonne recycled polymer)                                    | 6.4        |       | (1)                      |
| Process emissions (% of used amount)                                     |            |       |                          |
| Acetone                                                                  | 0.005%     |       | Assumed as in PEs and PP |

**Supplementary Table S27. Modeling Parameters and Assumptions Applied in Solvent-Based PVC Recycling**

| Polymer                                                                  | PVC                  |                   |                                            |
|--------------------------------------------------------------------------|----------------------|-------------------|--------------------------------------------|
|                                                                          |                      | Sensitivity range |                                            |
| Contamination level                                                      | <1%                  |                   | Assumption based on discussions in (11,12) |
| MRF loss rate                                                            | 13%                  | 6-30%             |                                            |
| Recycling polymer recovery rate                                          | 97.0%                | 92-100%           |                                            |
| Recycling solvent/non-solvent                                            | Cyclohexanone/Hexane |                   | (13)                                       |
| Recycling solvent/non-solvent amount (ml per gr waste polymer flake)     | 6.67ml/53.3ml        | ±30%              |                                            |
| Recycling solvent/non-solvent loss rate                                  | 5%   9%              | 0-25%   0-40%     | (13,14)                                    |
| Material quality loss each recycling cycle                               | 5%                   |                   | (11,12)                                    |
| Energy consumption (GJ/tonne)                                            |                      |                   |                                            |
| Collection (GJ/tonne plastic bale)                                       | 0.87                 | ±20%              | (4-6)                                      |
| MRF (incl., shredding, sorting, washing, drying) (GJ/tonne plastic bale) | 3.84                 |                   |                                            |
| Electricity (%)                                                          | 98.5%                |                   |                                            |
| Natural gas (%)                                                          | 1.5%                 |                   |                                            |
| Dissolution/precipitation process (GJ/tonne recycled polymer)            | 0.6                  | ±20%              | (5,6)                                      |
| Electricity (%)                                                          | 90.0%                |                   |                                            |
| Natural gas (%)                                                          | 10.0%                |                   |                                            |
| Solvent recovery (GJ/tonne recycled polymer)                             | 1                    | ±20%              |                                            |
| Electricity (%)                                                          | 2.0%                 |                   |                                            |
| Natural gas (%)                                                          | 7.0%                 |                   |                                            |
| Steam (%)                                                                | 91.0%                |                   |                                            |

|                                                  |        |      |                          |
|--------------------------------------------------|--------|------|--------------------------|
| Non-solvent recovery (GJ/tonne recycled polymer) | 1      | ±20% |                          |
| Electricity (%)                                  | 2.0%   |      |                          |
| Natural gas (%)                                  | 7.0%   |      |                          |
| Steam (%)                                        | 91.0%  |      |                          |
| Extrusion (GJ/tonne recycled polymer)            | 5.57   |      | (1)                      |
| <b>Process emissions (% of used amount)</b>      |        |      |                          |
| Cyclohexanone                                    | 0.005% |      | Assumed as in PEs and PP |
| Hexane                                           | 0.005% |      | Assumed as in PEs and PP |

**Supplementary Table S28. Modeling Parameters and Assumptions Applied in PET enzymatic hydrolysis**

| Polymer                                                                                                                           | PET                                                  |                   |        |
|-----------------------------------------------------------------------------------------------------------------------------------|------------------------------------------------------|-------------------|--------|
|                                                                                                                                   |                                                      | Sensitivity range |        |
| Contamination level                                                                                                               | 0%>                                                  |                   | (3)    |
| MRF loss rate                                                                                                                     | 19.00%                                               | 7-37%             | (7)    |
| PTA recovery rate (from flake)                                                                                                    | 82.0%                                                | 67-97%            | (3,15) |
| EG recovery rate (from flake)                                                                                                     | 50.0%                                                | 35-65%            |        |
| Recycling solvent                                                                                                                 | Water and enzyme                                     |                   |        |
| NaOH and Sulfuric acid demand (kg/kg rPET flake)                                                                                  | 1 kgNaOH/kgPETflake; 0.43 kgsulfuric acid/kgPETflake |                   |        |
| Recovered PTA and EG purity rate                                                                                                  | 98%                                                  | 90-100%           |        |
| Material quality loss each recycling cycle                                                                                        | 7%                                                   |                   | (3)    |
| Energy consumption (GJ/tonne)                                                                                                     |                                                      |                   |        |
| Collection (GJ/tonne plastic bale)                                                                                                | 0.87                                                 | ±20%              | (4-6)  |
| MRF (incl., shredding, sorting, washing, drying) (GJ/tonne plastic bale)                                                          | 3.84                                                 |                   |        |
| Electricity (%)                                                                                                                   | 98.5%                                                |                   |        |
| Natural gas (%)                                                                                                                   | 1.5%                                                 |                   |        |
| Pretreatment (incl., extrusion and cyro-grinding) (GJ/tonne PET flake)                                                            | 7.55                                                 | ±20%              | (3,15) |
| Electricity (%)                                                                                                                   | 100.0%                                               |                   |        |
| Enzymatic depolymerization and product recovery (incl., clarification, crystallization, TPA and EG recovery) (GJ/tonne PET flake) | 13.2                                                 | ±20%              | (3,15) |
| Electricity (%)                                                                                                                   | 17.0%                                                |                   |        |
| Steam (%)                                                                                                                         | 83.0%                                                |                   |        |
| Extrusion (GJ/tonne recycled polymer)                                                                                             | 5.28                                                 |                   | (1)    |

**Supplementary Table S29. Modeling Parameters and Assumptions Applied in PET methanolysis**

| Polymer                                          | PET                                   |                               |        |
|--------------------------------------------------|---------------------------------------|-------------------------------|--------|
|                                                  |                                       | Sensitivity range             |        |
| Contamination level                              | <30%                                  |                               | (3)    |
| MRF loss rate                                    | 19.0%                                 | 7-37%                         | (7)    |
| DMT recovery rate (from flake)                   | 85.0%                                 | 70-100%                       | (3,16) |
| EG recovery rate (from flake)                    | 80.0%                                 | 65-95%                        |        |
| Recycling solvent                                | Methanol                              |                               |        |
| Methanol and catalyst demand (kg/kg rPET flake)* | 3 kg/kgPETflake; 0.0018kg /kgPETflake |                               | (3,17) |
| Recovered DMT and EG purity rate                 | 94.5% for DMT; 92.6% for EG           | 90-99% for DMT; 88-97% for EG |        |
| Methanol loss rate                               | 3%                                    | 0-25%                         |        |

|                                                                                                                                                                                  |        |      |           |
|----------------------------------------------------------------------------------------------------------------------------------------------------------------------------------|--------|------|-----------|
| Material quality loss each recycling cycle                                                                                                                                       | -      |      | (3)       |
| <b>Energy consumption (GJ/tonne)</b>                                                                                                                                             |        |      |           |
| Collection (GJ/tonne plastic bale)                                                                                                                                               | 0.87   | ±40% | (4-6)     |
| MRF (incl., shredding, sorting, washing, drying) (GJ/tonne plastic bale)                                                                                                         | 6.6    | ±40% |           |
| Electricity (%)                                                                                                                                                                  | 98.5%  |      |           |
| Natural gas (%)                                                                                                                                                                  | 1.5%   |      |           |
| Pretreatment (incl. melt reactor) (GJ/tonne PET flake)                                                                                                                           | 2      | ±20% | (3,15)    |
| Electricity (%)                                                                                                                                                                  | 100.0% |      |           |
| Catalyst synthesis (GJ/tonne catalyst)                                                                                                                                           | 6.79   | ±10% | (15)      |
| Electricity (%)                                                                                                                                                                  | 100.0% |      |           |
| Depolymerization and product recovery (incl., pre-melting catalyst synthesis, clarification, crystallization, TPA and EG recovery, sodium sulfate recovery) (GJ/tonne PET flake) | 35.9   | ±20% | (3,15,17) |
| Electricity (%)                                                                                                                                                                  | 17.0%  |      |           |
| Steam (%)                                                                                                                                                                        | 83.0%  |      |           |
| Solvent (methanol) recovery (GJ/tonne recycled polymer)                                                                                                                          | 1      | ±20% |           |
| Electricity (%)                                                                                                                                                                  | 2.0%   |      | (5,15)    |
| Natural gas (%)                                                                                                                                                                  | 7.0%   |      |           |
| Steam (%)                                                                                                                                                                        | 91.0%  |      |           |
| Extrusion (GJ/tonne recycled polymer)                                                                                                                                            | 5.28   |      | (1)       |
| <b>Process emissions (% of used amount)</b>                                                                                                                                      |        |      |           |
| Methanol                                                                                                                                                                         | 0.005% |      | (3)       |

Note: Catalyst - ZN acetate. There is a direct relationship between the amount of methanol or enzymes used and monomer recovery rates (18). While reducing methanol use can lower emissions, it also decreases DMT recovery, resulting in limited overall emissions impact.

**Supplementary Table S30. Modeling Parameters and Assumptions Applied in PET glycolysis**

| Polymer                                                                                       | PET                |                   |           |
|-----------------------------------------------------------------------------------------------|--------------------|-------------------|-----------|
|                                                                                               |                    | Sensitivity range |           |
| Contamination level                                                                           | <30%               |                   | (3)       |
| MRF loss rate                                                                                 | 19.0%              | 7-37%             | (7)       |
| BHET recovery rate (from flake)                                                               | 89.0%              | 75-100%           | (3,17)    |
| Recycling solvent                                                                             | EG                 |                   |           |
| EG demand (kg/kg rPET flake)                                                                  | 0.23 kg/kgPETflake |                   |           |
| Recovered BHET purity rate                                                                    | 98% (colored)      | 90-100%           | (3,17)    |
| EG loss rate                                                                                  | 18%                | 10-25%            |           |
| Material quality loss each recycling cycle                                                    | 8%                 |                   | (3,19)    |
| <b>Energy consumption (GJ/tonne)</b>                                                          |                    |                   |           |
| Collection (GJ/tonne plastic bale)                                                            | 0.87               | ±40%              | (4-6)     |
| MRF (incl., shredding, sorting, washing, drying) (GJ/tonne plastic bale)                      | 6.6                | ±40%              |           |
| Electricity (%)                                                                               | 98.5%              |                   |           |
| Natural gas (%)                                                                               | 1.5%               |                   |           |
| Glycolysis (incl., clarification, crystallization, and EG recovery) (GJ/tonne BHET recovered) | 9.5                | ±20%              | (3,15,19) |
| Electricity (%)                                                                               | 10.0%              |                   |           |
| Steam (%)                                                                                     | 90.0%              |                   |           |
| Extrusion (GJ/tonne recycled polymer)                                                         | 5.28               |                   |           |

**Supplementary Table S31. Modeling Parameters and Assumptions Applied in Pyrolysis of Polyolefins\***

| Polymer                                                                                                                  | Polyolefins* |                   |                                              |
|--------------------------------------------------------------------------------------------------------------------------|--------------|-------------------|----------------------------------------------|
|                                                                                                                          |              | Sensitivity range |                                              |
| Contamination level                                                                                                      | 0%>          |                   | Assumption based on discussions in (5,20,21) |
| Pretreatment loss rate                                                                                                   | 15.00%       | 8-25%             | (15,20,21)                                   |
| Pyrolysis process loss                                                                                                   | 25.0%        | 15-35%            | (15)                                         |
| Recycling pyrolysis oil recovery rate                                                                                    | 50.0%        | 40-70%            | (22–24)                                      |
| Pyrolysis oil to virgin naphtha replacement ratio in steam craking unit (i.e., X% pyrolysis oil and 1-X% virgin naphtha) | 5%           | 0.5-20%           | (3,25,26)                                    |
| <b>Energy consumption (GJ/tonne)</b>                                                                                     |              |                   |                                              |
| Collection (GJ/tonne plastic bale)                                                                                       | 0.87         | ±20%              | (4–6)                                        |
| Pretreatment (incl., shredding, extensive sorting, washing, drying, pelletizing) (GJ/tonne plastic bale)**               | 7.11         |                   |                                              |
| Electricity (%)                                                                                                          | 98.5%        |                   |                                              |
| Natural gas (%)                                                                                                          | 1.5%         |                   |                                              |
| Thermal Pyrolysis reactor (incl. cracking and condensation) (GJ/tonne plastic flake)                                     | 17.53        | ±20%              | (27)                                         |
| Electricity (%)                                                                                                          | 9.0%         |                   |                                              |
| Pyrolysis oil (%)                                                                                                        | 63.0%        |                   |                                              |
| Steam (%) (from pyrolysis gas)                                                                                           | 28.0%        |                   |                                              |
| <b>Direct emissions to the air (kg/t recycled pyrolysis oil)</b>                                                         |              |                   |                                              |
| CO <sub>2</sub>                                                                                                          | 870          |                   | (22)                                         |
| CO                                                                                                                       | 1.7          |                   |                                              |
| NO <sub>x</sub>                                                                                                          | 0.47         |                   |                                              |
| SO <sub>x</sub>                                                                                                          | 0.00045      |                   |                                              |

Note: \* Polyolefins include LDPE, LLDPE, HDPE, and PP in this analysis. \*\* It is assumed that most waste that goes to plastic pyrolysis is collected as mixed waste. Thus, extensive sorting is required to avoid equipment damage.

**Supplementary Table S32. Modeling Parameters and Assumptions Applied in Pyrolysis of PS**

| Polymer                                                                                                    | PS    |                   |                                               |
|------------------------------------------------------------------------------------------------------------|-------|-------------------|-----------------------------------------------|
|                                                                                                            |       | Sensitivity range |                                               |
| Contamination level                                                                                        | 0%>   |                   | Assumption based on discussions in (15,20,21) |
| Pretreatment loss rate                                                                                     | 15.0% | 5-40%             | (15,20,21)                                    |
| Pyrolysis process loss                                                                                     | 25.0% | 15-35%            | (15)                                          |
| Recycling styrene recovery rate                                                                            | 59.0% | 40-70%            | (28-30)                                       |
| Pyrolysis styrene to virgin styrene replacement ratio (i.e., X% pyrolysis styrene and 1-X% virgin styrene) | 98.0% | 80-100%           |                                               |
| Energy consumption (GJ/tonne)                                                                              |       |                   |                                               |
| Collection (GJ/tonne plastic bale)                                                                         | 0.87  | ±20%              | (4-6)                                         |
| Pretreatment (incl., shredding, extensive sorting, washing, drying) (GJ/tonne plastic bale)*               | 7.11  |                   |                                               |
| Electricity (%)                                                                                            | 98.5% |                   |                                               |
| Natural gas (%)                                                                                            | 1.5%  |                   |                                               |
| Thermal Pyrolysis reactor (incl. cracking and condensation) (GJ/tonne plastic flake)                       | 11.34 | ±20%              | (27,28)                                       |
| Electricity (%)                                                                                            | 9.0%  |                   |                                               |
| Pyrolysis oil (%)                                                                                          | 63.0% |                   |                                               |
| Steam (%) (from pyrolysis gas)                                                                             | 28.0% |                   |                                               |

| <b>Emissions to the air (kg/t recycled styrene)</b> |        |  |     |
|-----------------------------------------------------|--------|--|-----|
| CO                                                  | 2.0    |  | (3) |
| NO <sub>x</sub>                                     | 0.6    |  |     |
| SO <sub>x</sub>                                     | 0.0005 |  |     |

Note: \* It is assumed that most waste that goes to plastic pyrolysis is collected as mixed waste. Thus, extensive sorting is required to avoid equipment damage.

**Supplementary Table S33. Modeling Parameters and Assumptions Applied in Gasification and F-T synthesis of mixed plastics of (Polyolefins, PET, and PS)**

| Polymer                                                                                                               | Mixed plastic of L(L)DPE, HDPE, PP, PET, PS |                   |                                               |
|-----------------------------------------------------------------------------------------------------------------------|---------------------------------------------|-------------------|-----------------------------------------------|
|                                                                                                                       |                                             | Sensitivity range |                                               |
| Contamination level                                                                                                   | 0%>                                         |                   | Assumption based on discussions in (15,20,21) |
| Pretreatment loss rate                                                                                                | 25.0%                                       | 10-40%            | (15,20,21)                                    |
| Recycling syngas recovery rate                                                                                        | 187.0%                                      | 175-200%          | (31,32)                                       |
| F-T liquids/plastic flake (kg/kg plastic flake)                                                                       | 0.25                                        |                   | (33)                                          |
| F-T liquids to virgin naphtha replacement ratio in steam cracking unit (i.e., X% F-T liquids and 1-X% virgin naphtha) | 95.0%                                       | 85-100%           | (3)                                           |
| Oxygen/plastic waste (no PS in the mix) (kg/kg plastic waste)                                                         | 0.87                                        |                   | (31,32,34)                                    |
| Oxygen/plastic waste (PS in the mix) (kg/kg plastic waste)                                                            | 0.84                                        |                   |                                               |
| Catalytic powder/plastic waste (kg/kg plastic waste)                                                                  | 0.05                                        |                   |                                               |
| Nitrogen/plastic waste (kg/kg plastic waste)                                                                          | 0.40                                        |                   |                                               |
| Energy consumption (GJ/tonne)                                                                                         |                                             |                   |                                               |
| Collection (GJ/tonne plastic bale)                                                                                    | 0.87                                        | ±20%              | (27)                                          |
| Pretreatment (incl., sorting, washing, drying, extrusion, pelletizing, milling) (GJ/tonne plastic bale)*              | 7.25                                        |                   |                                               |
| Electricity (%)                                                                                                       | 98.5%                                       |                   |                                               |
| Natural gas (%)                                                                                                       | 1.5%                                        |                   |                                               |
| Gasification reactor (incl. including cooling and clean up, light hydrocarbon treatment) (GJ/tonne plastic bale)**    | 4.75                                        | ±20%              | (31,32)                                       |
| Electricity (%)                                                                                                       | 42.5%                                       |                   |                                               |
| Process tars (%)                                                                                                      | 0.0%                                        |                   |                                               |
| Process char (%)                                                                                                      | 0.0%                                        |                   |                                               |
| Steam (%) (from process gas)                                                                                          | 57.5%                                       |                   |                                               |
| Syngas conditioning (incl. compression and water gas shift) (GJ/tonne plastic bale)                                   | 3.14                                        | ±20%              | (31)                                          |
| Electricity (%)                                                                                                       | 73.0%                                       |                   |                                               |
| Steam (%) (from process gas)                                                                                          | 27.0%                                       |                   |                                               |
| Fischer-Tropsch synthesis (GJ/tonne liquids recovered)                                                                | 144.5                                       | ±20%              | (35)                                          |
| Steam (%) (from process gas)                                                                                          | 100.0%                                      |                   |                                               |
| Emissions to the air (kg CO2/t plastic waste)                                                                         |                                             |                   |                                               |
| Flue gas CO2                                                                                                          | 0.84                                        |                   | (31,32,34)                                    |
| Syngas conditioning CO2 (no PS)                                                                                       | 0.79                                        |                   |                                               |
| Syngas conditioning CO2 (with PS)                                                                                     | 0.95                                        |                   |                                               |

Note: \* The pretreatment process for gasifying plastic waste shares some similarities with a Materials Recovery Facility (MRF) process, but also has distinct differences. Both involve initial sorting and processing of materials, but gasification pretreatment focuses on preparing plastic for a thermal process, while MRFs prioritize material recovery. The pretreatment

for gasification involves additional steps such as pelletizing, rinsing, milling, and drying plastics to ensure they are suitable for efficient gasification, which converts them into synthesis gas (syngas) for use as fuel or chemical feedstock (36). It is also assumed that most waste that goes to plastic gasification is collected as mixed waste. Metallic contaminants and other solids should be removed before the gasification chamber. Thus, extensive sorting is required to avoid equipment damage. \*\* Pyrolysis of plastic generally consumes more energy than gasification because pyrolysis requires higher temperatures and is typically conducted in the absence of oxygen, leading to a more energy-intensive process for achieving the desired thermal cracking of polymers (37). Gasification, while also involving high temperatures, can be more self-sufficient as the partial oxidation process generates some energy from the feedstock, while pyrolysis relies more heavily on external energy sources to reach the necessary temperatures.

**Supplementary Table S34. Modeling Parameters and Assumptions Applied in Gasification and methanol synthesis of mixed plastics of (Polyolefins, PET, and PS)**

| Polymer                                                                                                          | Mixed plastic of L(L)DPE, HDPE, PP, PET, PS |                   |                                               |
|------------------------------------------------------------------------------------------------------------------|---------------------------------------------|-------------------|-----------------------------------------------|
|                                                                                                                  |                                             | Sensitivity range |                                               |
| Contamination level                                                                                              | 0%>                                         | 0%>               | Assumption based on discussions in (15,20,21) |
| MRF loss rate                                                                                                    | 25.0%                                       | 10-40%            | (15,20,21)                                    |
| Recycling syngas recovery rate                                                                                   | 187.0%                                      | 175-200%          | (31,32)                                       |
| Methanol/ plastic flake (kg/kg plastic flake)                                                                    | 0.45                                        |                   | (34)                                          |
| Methanol recovered to virgin methanol replacement ratio                                                          | 100.0%                                      |                   | (3)                                           |
| Oxygen/plastic waste (no PS in the mix) (kg/kg plastic waste)                                                    | 0.87                                        |                   | (31,32,34)                                    |
| Oxygen/plastic waste (PS in the mix) (kg/kg plastic waste)                                                       | 0.84                                        |                   |                                               |
| Catalytic powder/plastic waste (kg/kg plastic waste)                                                             | 0.05                                        |                   |                                               |
| Nitrogen/plastic waste (kg/kg plastic waste)                                                                     | 0.40                                        |                   |                                               |
| Energy consumption (GJ/tonne)                                                                                    |                                             |                   |                                               |
| Collection (GJ/tonne plastic bale)                                                                               | 0.87                                        | ±20%              | (27)                                          |
| Pretreatment (incl., sorting, washing, drying, extrusion, pelletizing, milling) (GJ/tonne plastic bale)*         | 7.25                                        |                   |                                               |
| Electricity (%)                                                                                                  | 98.5%                                       |                   |                                               |
| Natural gas (%)                                                                                                  | 1.5%                                        |                   |                                               |
| Gasification reactor (incl. including cooling and clean up, light hydrocarbon treatment) (GJ/tonne plastic bale) | 4.75                                        | ±20%              | (31,32)                                       |
| Electricity (%)                                                                                                  | 42.5%                                       |                   |                                               |
| Process tars (%)                                                                                                 | 0.0%                                        |                   |                                               |
| Process char (%)                                                                                                 | 0.0%                                        |                   |                                               |
| Steam (%) (from process gas)                                                                                     | 57.5%                                       |                   |                                               |
| Syngas conditioning (incl. compression and water gas shift) (GJ/tonne plastic bale)                              | 3.14                                        | ±20%              | (31)                                          |
| Electricity (%)                                                                                                  | 73.0%                                       |                   |                                               |
| Steam (%) (from process gas)                                                                                     | 27.0%                                       |                   |                                               |
| Methanol synthesis and distillation (GJ/tonne methanol recovered)                                                | 14.0                                        | ±20%              | (35)                                          |
| Electricity (%)                                                                                                  | 100.0%                                      |                   |                                               |
| Emissions to the air (kg CO2/t plastic waste)                                                                    |                                             |                   |                                               |
| Flue gas CO2                                                                                                     | 0.84                                        |                   | (31,32,34)                                    |
| Syngas conditioning CO2 (no PS)                                                                                  | 0.79                                        |                   |                                               |
| Syngas conditioning CO2 (with PS)                                                                                | 0.95                                        |                   |                                               |

Note: \* Same as Supplementary Table S33.

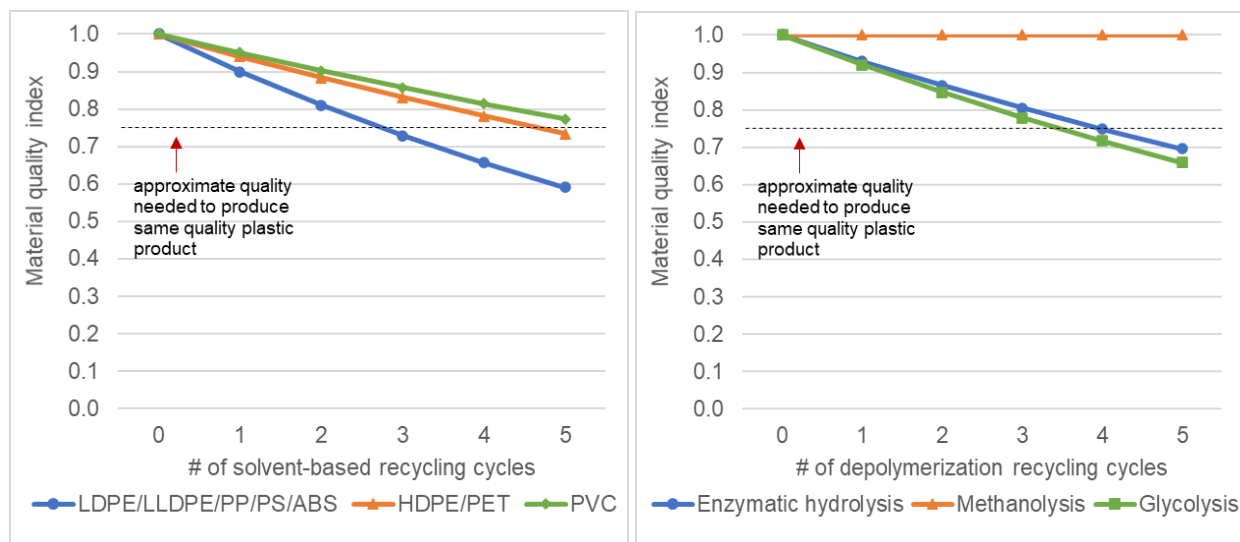

**Supplementary Fig. S21. Material quality degradation of the solvent-based and depolymerization recycled polymers assumed in this analysis**

Note: Material quality index 1.0 represents 100% quality.

Source: (3)

### c. Chemical agents' production

#### Hexane

Hexane is an organic solvent that is classified as a straight-chain neutral aliphatic hydrocarbon (38). It is a colorless, volatile petroleum distillate that is relatively insoluble in water and is present as a minor component of gasoline. Because of its low water solubility and volatility, it would have a propensity to migrate to the atmosphere following an environmental release. Hexane is generally produced from naphtha, one of the lightest fractions obtained directly from petroleum refining. In this study, we assume an average unit energy consumption of 0.94 GJ per tonne hexane.

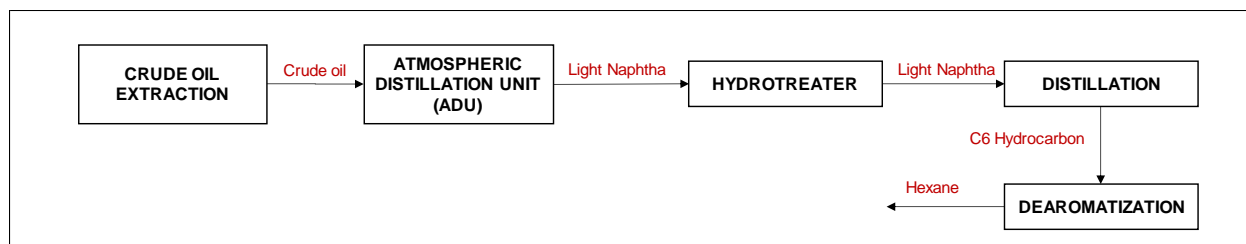

**Supplementary Fig. S22. Hexane production value chain and material flow chart**

Note: A C6 hydrocarbon is an organic compound composed of six carbon atoms and associated hydrogen atoms.

Examples include hexane, cyclohexane, and other isomers or derivatives with six carbon atoms.

#### Benzyl alcohol

Benzyl alcohol is an aromatic alcohol that consists of benzene. It is commonly used as a solvent in inks, paints, glues, and resins, in household cleaners and detergents (39). Benzyl alcohol is produced industrially from toluene via benzyl chloride, which is hydrolyzed via alkaline

hydrolysis (e.g., with sodium hydroxide). Another route is hydrogenation of benzaldehyde (40). There is not any information in the literature regarding how much of benzyl alcohol is from hydrolysis of benzyl chloride vs hydrogenation of benzaldehyde. In this study, we assume that 100% of benzyl alcohol comes from hydrolysis of benzyl chloride as it is the most common one and the global average unit energy consumption for this process is 12.5 GJ per tonne benzyl alcohol (41). We also assume a production ratio of 1.18 tonnes benzyl chloride per tonne benzyl alcohol, based on (42).

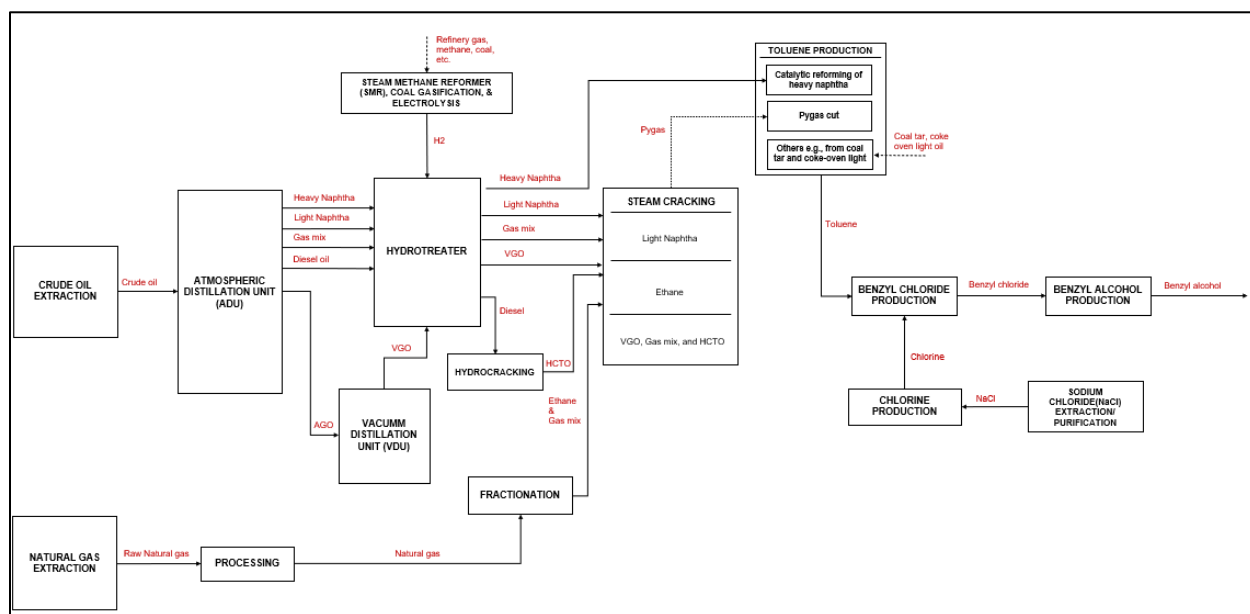

**Supplementary Fig. S23. Benzyl Alcohol production value chain and material flow chart**

### **Benzyl chloride**

Benzyl chloride is prepared industrially by the gas-phase photochemical reaction of toluene with chlorine. When producing benzyl chloride from toluene, the typical input ratio is roughly 0.9 kg of toluene and 1.43 kg of chlorine per 1.0 kg of benzyl chloride produced (43). The energy consumption for benzyl chloride production is typically around 10-15 MJ/kg depending on the specific manufacturing process, raw materials used, and efficiency of the production facility (43). In this study, we assume an average unit energy consumption of 10GJ per tonne benzyl chloride.

### **Methanol**

Methanol is produced traditionally from natural gas in regions other than China, where its production is dominated by coal. Currently, about 55% of global methanol production is based on coal feedstock and about 35% on natural gas, with the rest using coke gas and other feedstocks (1). In this study, it is assumed that the share of feedstocks other than natural gas, coal, and coke gas is negligible. Methanol production from coal has significantly higher energy consumption (~24 GJ/t methanol) compared to methanol from natural gas (~14 GJ/t methanol) (1). In addition, methanol production has significantly low conversion efficiency, ranging from



67-75% for natural gas to methanol, and 48-61% for coal to methanol (1). Please see Karali et al. (1) for more details of methanol production.

**Supplementary Table S35. Methanol production conversion efficiency by feedstock assumed in this analysis**

|                               | Natural gas | Coal | Coke gas |
|-------------------------------|-------------|------|----------|
| Process conversion efficiency | 71%         | 55%  | 55%      |

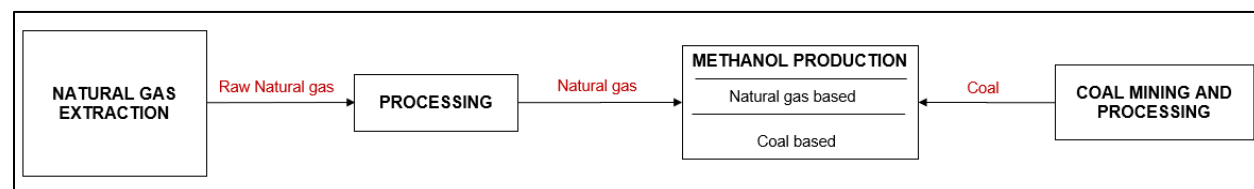

**Supplementary Fig. S24. Methanol production value chain and material flow chart**

### Cyclohexanone

Cyclohexanone is a synthetic organic liquid used primarily as an intermediate in the production of nylon. Other minor applications are as an intermediate, additive and solvent in a variety of products. The industrial production is achieved by three routes: cyclohexane oxidation, phenol hydrogenation, and conversion of benzene into cyclohexanone (44). Among the various these processes, cyclohexane oxidation technique is the most widely used in industry, because of its relatively low cost. The typical yield of cyclohexanone from cyclohexane oxidation is relatively low, usually around 8-10% conversion (45). The oxidation of cyclohexane to cyclohexanone requires a significant amount of energy due to the harsh conditions typically needed for this reaction, including high temperatures and pressures. Energy consumption from this process is typically around 2-3 MJ/kg depending on the specific process used, with some studies indicating a net energy consumption closer to 0.7 MJ/kg produced cyclohexanone (45). Production of cyclohexanone from phenol requires about 3.4 MJ per kg product (46). A typical cyclohexanone yield can range from around 80% to over 95% depending on the specific catalyst, reaction conditions, and optimization techniques used.

**Supplementary Table S36. Market share and energy demand of cyclohexanone production per process assumed in this analysis**

|                                            | Cyclohexane oxidation                      | Phenol hydrogenation                  | Others       |
|--------------------------------------------|--------------------------------------------|---------------------------------------|--------------|
| Global market share (%)                    | 65%                                        | 30%                                   | 5%           |
| Global average energy intensity (GJ/tonne) | 1.6 GJ/tonne                               | 3.4 GJ/tonne                          | 0.7 GJ/tonne |
| Input demand (tonne/tonne)                 | 11.1 tonne Cyclohexane/tonne Cyclohexanone | 1.14 tonne Phenol/tonne Cyclohexanone |              |



been proposed for this alkylation reaction, including boron trifluoride, hydrogen fluoride, aluminum chloride, and phosphoric acid. Cumene yield is limited to about 95% with average energy consumption of 3.8 GJ/tonne cumene (52).

### **Benzene, Toluene, and Xylene (BTX)**

Approximately 50% of the global benzene supply comes from the catalytic reforming of heavy naphtha, followed by toluene-based processes at 25%, and pygas cut at 25% (1). Approximately 70% of the global toluene supply comes from the catalytic reforming of heavy naphtha, followed by pygas cut at 25%, and other materials at 5% (1). Globally, most xylene (~79%) is produced by catalytic reforming of heavy naphtha. Approximately 17% is produced by toluene-based processes, followed by about 4% from pygas cut (1). Pygas is a highly aromatic intermediate hydrocarbon produced by the steam cracking of light naphtha and VGO along with ethylene, propylene, and butadiene. It is often used as a highly aromatic hydrocarbon feedstock for the aromatic extraction of benzene, toluene, and xylene from a pyrolytic cracking process called “pygas cut.” Supplementary Table S18 shows the process yields and unit energy consumptions of production technologies used to produce benzene, toluene, and xylene, along with the data assumed in this analysis. Please refer to Karali et al. (1) for more detailed description and data.

**Supplementary Table S37. BTX yields and unit energy consumption from different production processes assumed in this analysis**

|                                                        | Yield (%) | Energy intensity (GJ/tonne product) |
|--------------------------------------------------------|-----------|-------------------------------------|
| <b>Benzene</b>                                         |           |                                     |
| Catalytic reforming                                    | 5.7%      | 4.1 GJ/tonne benzene                |
| Transalkylation and disproportionation of toluene      | 42%       | 4.5 GJ/tonne benzene                |
| Pygas cut                                              | 33%       | 5.5 GJ/tonne benzene                |
| <b>Toluene</b>                                         |           |                                     |
| Catalytic reforming                                    | 13-26%    | 2.2 GJ/tonne toluene                |
| Pygas cut                                              | 19-20%    | 5.5 GJ/tonne toluene                |
| Other materials e.g., coal tar and coke-oven light oil | 18%       | 2.4 GJ/tonne toluene                |
| <b>Xylene</b>                                          |           |                                     |
| Catalytic reforming                                    | 20%       | 14.7 GJ/tonne xylene                |
| Transalkylation and disproportionation of toluene      | 97%       | 27.3 GJ/tonne p-xylene              |
| Pygas cut                                              | 8%        | 14.1 GJ/tonne p-xylene              |

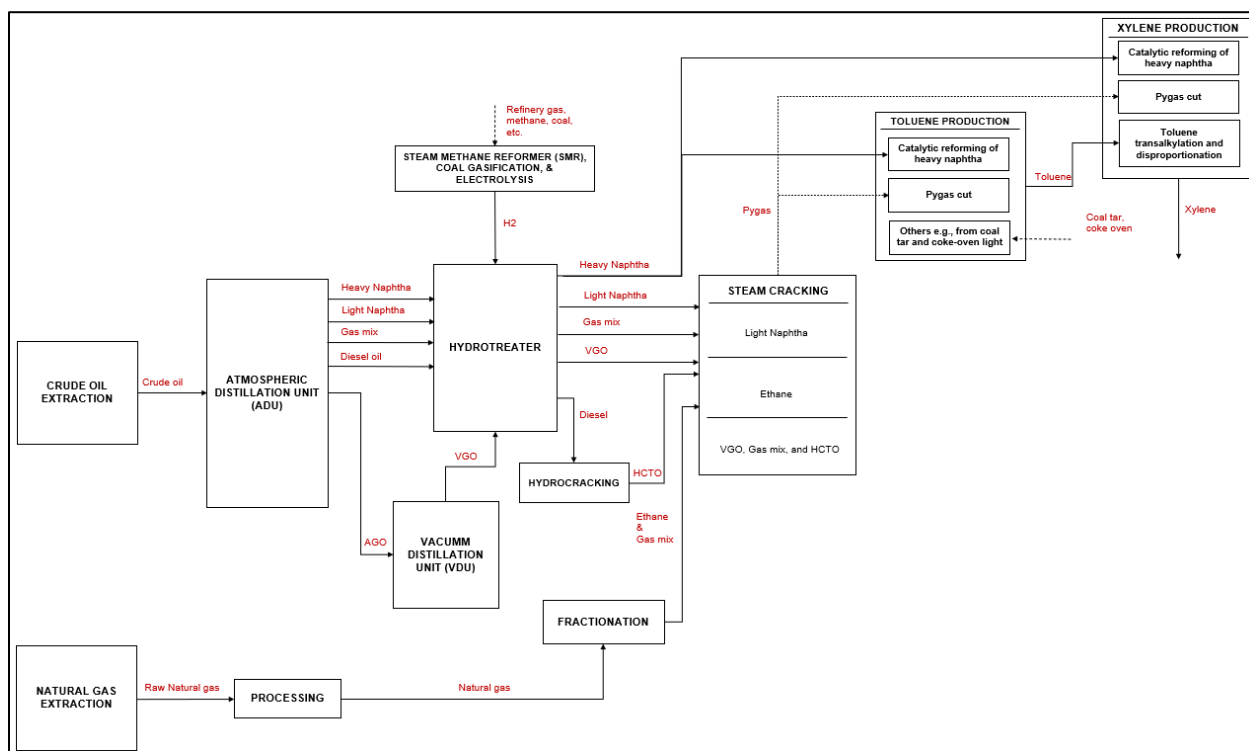

**Supplementary Fig. S26. Xylene and Toluene production value chain and material flow chart**

### **Dichloromethane (DCM)**

DCM, commonly called methylene chloride, is a solvent that is widely used in chemical research and manufacturing. DCM is commonly produced by chlorination of methane with chlorine or by the chlorination of methanol with hydrogen chloride followed by chlorination of methyl chloride (53). Although dichloromethane is the least toxic C1 chlorohydrocarbon, it does present hazards. Inhaling it can produce symptoms ranging from drowsiness to respiratory tract irritation and even death.

The energy demand for DCM production is significant, primarily due to the high temperature required for the chlorination reaction of methane or chloromethane, typically ranging between 400°C to 500°C, which necessitates a large amount of heat energy to initiate and sustain the chemical process; this is the main factor contributing to its energy-intensive production (54). According to available data, the energy demand for dichloromethane (DCM) production is typically around 0.32 MJ/kg. Chlorine production is a very energy-intensive process, and the average energy intensity assumed in this analysis is 11.04 GJ/tonne chlorine, based on (1). Supplementary Table S8 summarizes the input demand of the chloromethane production (i.e., chlorination of methane with chlorine) used in this analysis.

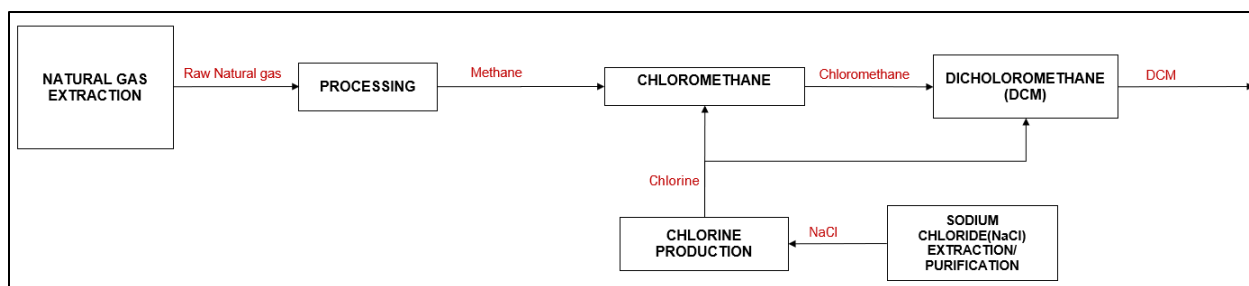

**Supplementary Fig. S27. DCM production value chain and material flow chart**

**Supplementary Table S38. Input requirement of DCM production per process assumed in this analysis**

|                        | Input (kg/kg product) |
|------------------------|-----------------------|
| Chloromethane/DCM      | 0.25                  |
| Chlorine/DCM           | 0.84                  |
| Chlorine/Chloromethane | 2.0                   |
| Methane/Chloromethane  | 0.64                  |

### **Sodium hydroxide (NaOH)**

Sodium hydroxide is primarily produced through three electrolytic methods. Membrane cells use ion-exchange membranes to separate chlorine and sodium hydroxide streams, yielding high-purity NaOH (30% to 50%) with minimal salt contamination, making it ideal for sensitive industries (55). Diaphragm cells, employing asbestos barriers, produce dilute NaOH requiring energy-intensive evaporation to reach 50% concentration (56). Electrodialysis with bipolar membranes (EDBM) converts brine waste into HCl and NaOH. Membrane technology dominates modern production. Tables S35 and S36 summarizes the data used for NaOH production in this analysis.

**Supplementary Table S39. Market share and energy demand of NaOH production per process assumed in this analysis**

|                                            | Membrane     | Diaphragm    | EDBM          |
|--------------------------------------------|--------------|--------------|---------------|
| Global market share (%)                    | 60%          | 20%          | 20%           |
| Global average energy intensity (GJ/tonne) | 8.9 GJ/tonne | 8.2 GJ/tonne | 10.3 GJ/tonne |

**Supplementary Table S40. Process output shares from electrolysis of NaCl assumed in this analysis**

|                             |     |
|-----------------------------|-----|
| NaOH                        | 50% |
| Chlorine (Cl <sub>2</sub> ) | 47% |
| Others                      | 3%  |

Source: (57)

### **Sulfuric acid**

Sulfuric acid is produced mainly by the contact process, which begins with burning elemental sulfur or recovering sulfur dioxide (SO<sub>2</sub>) from metallurgical off-gases or spent acid. The production is highly exothermic, allowing for energy recovery as high-pressure steam or

electricity. Sulfuric acid is the world's most widely produced chemical, essential for fertilizers, explosives, dyes, petroleum refining, and many industrial processes. In this study, we assume an average unit energy consumption of 0.15 GJ per tonne sulfuric acid (58).

### **Nitrogen and Oxygen**

Nitrogen is produced industrially through methods such as cryogenic (fractional) distillation, pressure swing adsorption (PSA), and membrane separation. Overall, all three methods are energy intensive, especially for high-purity or large-volume applications. In this study, we assume an average unit energy consumption of 2 GJ per tonne nitrogen (59).

Oxygen is produced industrially primarily through cryogenic air separation, a process that cools air to extremely low temperatures to liquefy it and then separates oxygen from nitrogen and other gases based on their different boiling points. This method is very energy intensive, typically requiring between 0.2 and 0.7 kilowatt-hours (0.72–2.5 MJ) of electricity per kilogram of oxygen produced (59), mainly due to the energy needed for air compression, refrigeration, and distillation. In this study, we assume an average unit energy consumption of 1.3 GJ per tonne oxygen.

**Supplementary Table S41. Shares of fuels used in production of chemicals, assumed in this analysis**

|                  | Electricity | Residual oil/VGO/heating oil | Natural gas | Refinery gas | Petroleum coke | Offsite steam |
|------------------|-------------|------------------------------|-------------|--------------|----------------|---------------|
| Hexane           | 4.5%        | 1.4%                         | 26.0%       | 51.6%        | 12.7%          | 3.8%          |
| Benzyl alcohol   | 4.5%        | 1.4%                         | 26.0%       | 51.6%        | 12.7%          | 3.8%          |
| Benzyl chloride  | 4.5%        | 1.4%                         | 26.0%       | 51.6%        | 12.7%          | 3.8%          |
| Cyclohexanone    | 14.0%       |                              | 86.0%       |              |                |               |
| Phenol           | 6.0%        |                              | 94.0%       |              |                |               |
| Acetone          |             |                              |             |              |                |               |
| Cumene           | 2.0%        |                              |             |              |                | 98.0%         |
| Dichloromethane  | 45.0%       |                              | 55.0%       |              |                |               |
| Sodium hydroxide | 98.0%       |                              |             |              |                | 2.0%          |
| Sulfuric acid    | 100.0%      |                              |             |              |                |               |
| Nitrogen         | 100.0%      |                              |             |              |                |               |
| Oxygen           | 3.0%        |                              | 97.0%       |              |                |               |

Note: See Karali et al. (1) for methanol and BTX.

### ***d. Collection modeling and assumptions***

**Supplementary Table S42. Production share and lifetime assumptions**

|                |                       | Production share per application (%) | Lifetime assumption (years) |
|----------------|-----------------------|--------------------------------------|-----------------------------|
| LDPE/<br>LLDPE | Construction          | 5%                                   | 10                          |
|                | Consumer products     | 13%                                  | 2                           |
|                | Electrical/electronic | 3%                                   | 5                           |
|                | Packaging             | 70%                                  | 0.25                        |

|      |                       |     |      |
|------|-----------------------|-----|------|
|      | Vehicles              | 1%  | 15   |
|      | Others                | 8%  | 1.3  |
| HDPE | Construction          | 19% | 10   |
|      | Consumer products     | 11% | 2    |
|      | Electrical/electronic | 1%  | 5    |
|      | Packaging             | 56% | 0.25 |
|      | Vehicles              | 5%  | 15   |
|      | Others                | 8%  | 3.3  |
| PP   | Construction          | 5%  | 10   |
|      | Consumer products     | 22% | 2    |
|      | Electrical/electronic | 5%  | 5    |
|      | Packaging             | 43% | 0.25 |
|      | Vehicles              | 16% | 15   |
|      | Fibers                | 8%  | 2.5  |
|      | Others                | 1%  | 3.9  |
| PET  | Packaging             | 66% | 0.25 |
|      | Fiber                 | 34% | 2.5  |
| PS   | Construction          | 29% | 10   |
|      | Consumer products     | 25% | 2    |
|      | Electrical/electronic | 8%  | 5    |
|      | Packaging             | 28% | 0.25 |
|      | Others                | 10% | 4.3  |
| ABS  | Construction          | 3%  | 10   |
|      | Consumer products     | 44% | 2    |
|      | Electrical/electronic | 27% | 5    |
|      | Packaging             | 19% | 0.25 |
|      | Others                | 7%  | 2.8  |
| PVC  | Construction          | 69% | 10   |
|      | Consumer products     | 5%  | 2    |
|      | Electrical/electronic | 3%  | 5    |
|      | Packaging             | 7%  | 0.25 |
|      | Vehicles              | 4%  | 15   |
|      | Others                | 12% | 8.8  |

Note: Production share assumptions are based on (1).

### ***Collection scenarios through the modeling period***

Collection scenarios are defined for the period 2025-2050, with all scenarios beginning at a collection rate of 0.1% in 2025.

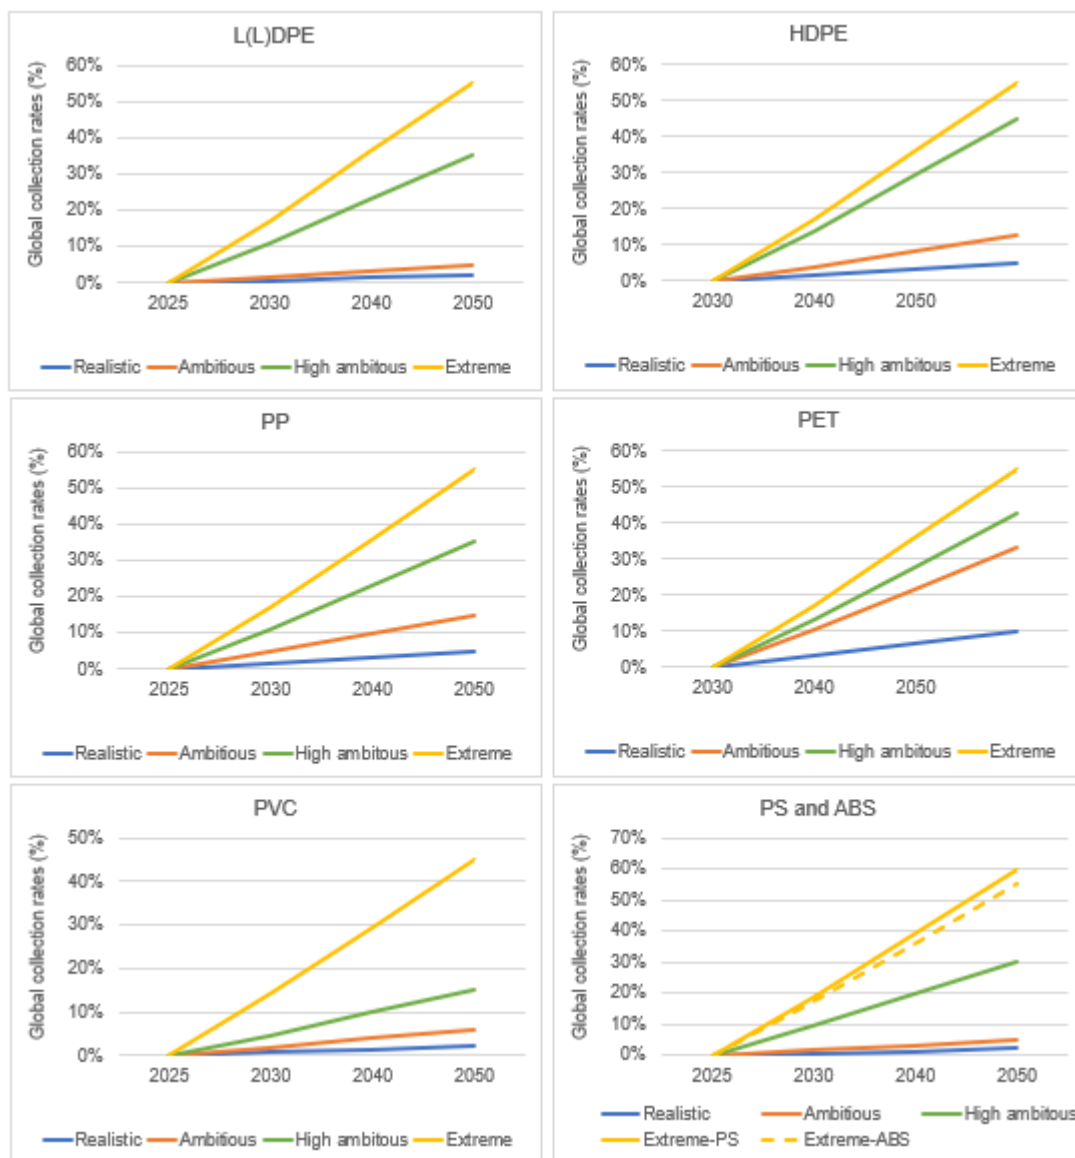

**Supplementary Fig. S28. Collection rates assumed between 2025 and 2050 per polymer in the solvent-based recycling scenarios.**

*Note: y-scales are not uniform across charts.*



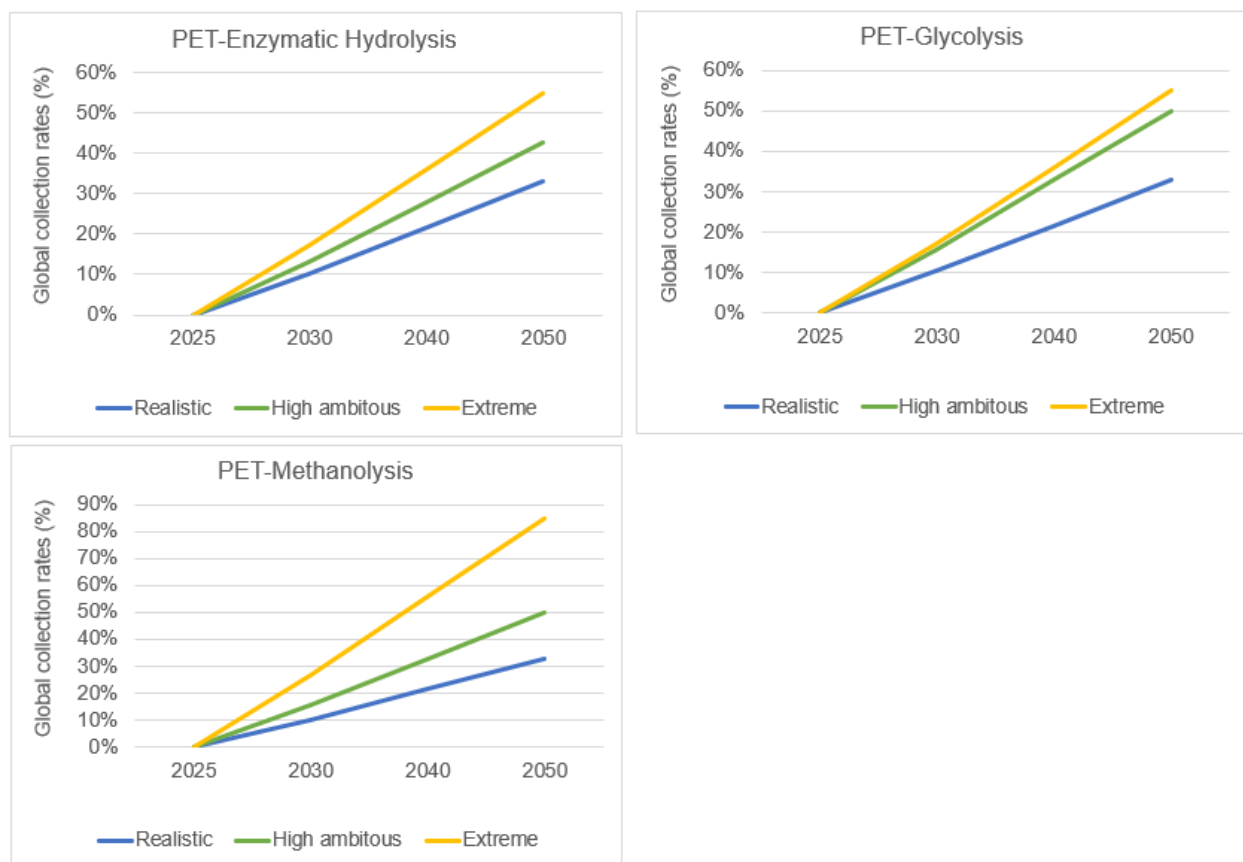

**Supplementary Fig. S29. Collection rates assumed between 2025 and 2050 per polymer in the depolymerization scenarios**

*Note: y-scales are not uniform across charts.*

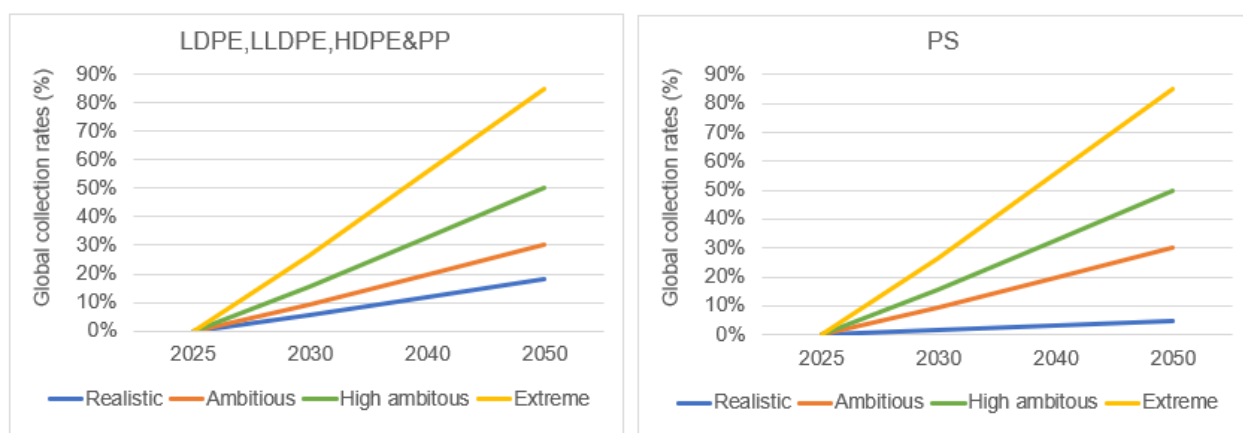

**Supplementary Fig. S30. Collection rates assumed between 2025 and 2050 per polymer in the pyrolysis scenarios**

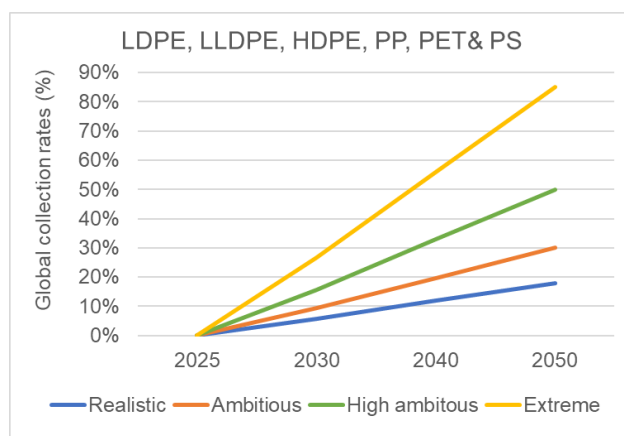

**Supplementary Fig. S31. Collection rates assumed between 2025 and 2050 in the gasification scenarios**

*e. Reference scenario GHG emissions*

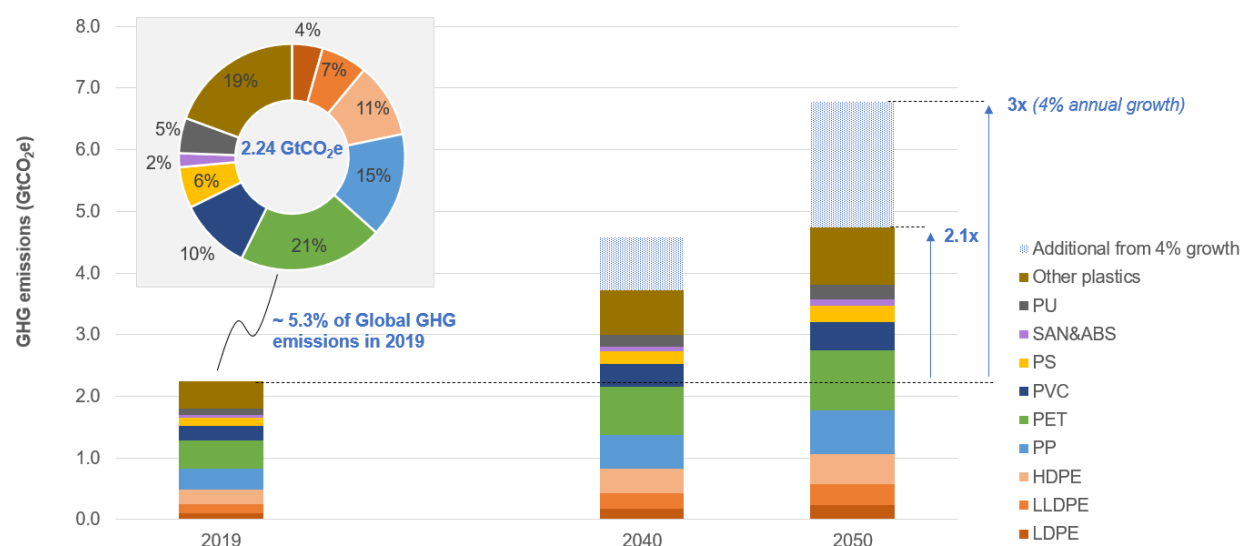

**Supplementary Fig. S32. A. GHG emissions from primary plastic production by polymer type in 2019, 2040 and 2050**

Notes: Projections are under the assumption that current production and consumption trends remain constant. SAN = Styrene Acrylonitrile.

Source: (1)

*f. Other assumptions*

**Supplementary Table S43. Fuel combustion emission factors by fuel type assumed in this analysis**

|                          | Emission factor (kgCO <sub>2</sub> /GJ) |
|--------------------------|-----------------------------------------|
| Coal                     | 94.6                                    |
| Gas                      | 56.1                                    |
| Oil (gas, diesel, other) | 73.3                                    |
| Refinery gas             | 57.6                                    |

|                   |                               |
|-------------------|-------------------------------|
| Petroleum coke    | 97.5                          |
| Coke oven gas     | 52.6                          |
| Residual fuel oil | 77                            |
| Gasoline          | 69                            |
| Electricity       | 128                           |
| Offsite steam     | 56.1 (assumed as natural gas) |

Source: (1)

#### Supplementary Table S44. Conversion factors to CO<sub>2</sub>e equivalents (CO<sub>2</sub>e)

|                 | Conversion factor to CO <sub>2</sub> e |
|-----------------|----------------------------------------|
| CH <sub>4</sub> | 29.8                                   |
| CO              | 2.0                                    |
| SO <sub>2</sub> | 0.44                                   |
| NO <sub>x</sub> | 8.5                                    |
| Xylene          | 16                                     |
| Hexane          | 0.9                                    |
| Benzyl Alcohol  | 0.9                                    |
| Acetone         | 0.5                                    |
| DCM             | 9.0                                    |
| Cyclohexanone   | 0                                      |

In addition, fossil fuels (namely crude oil, natural gas, and coal) are used as feedstock and fuel energy sources of plastic production. The extraction of fossil fuels includes several activities: from exploration, through drilling, fracking, and mining, and then development, production and extraction, to surface processing and transport to refineries and/or processing facilities. Each of these activities causes emissions: direct emissions, like CH<sub>4</sub> leakage and flaring, along with emissions from fuel combustion. In this analysis, we assumed that

- 10.3 gCO<sub>2</sub>e/MJ crude oil, (or 0.5 kg CO<sub>2</sub>e/kg crude oil with an average heat value of 44.5 MJ/kg crude oil for unit GHG emissions of crude oil production),
- 13.3 gCO<sub>2</sub>e/MJ natural gas, (or 0.7 kg CO<sub>2</sub>e/kg natural gas with an average heat value of 50 MJ/kg natural gas for unit GHG emissions of natural gas production, and
- 0.2 kg CO<sub>2</sub>e/kg coal for unit GHG emissions of coal production (1).

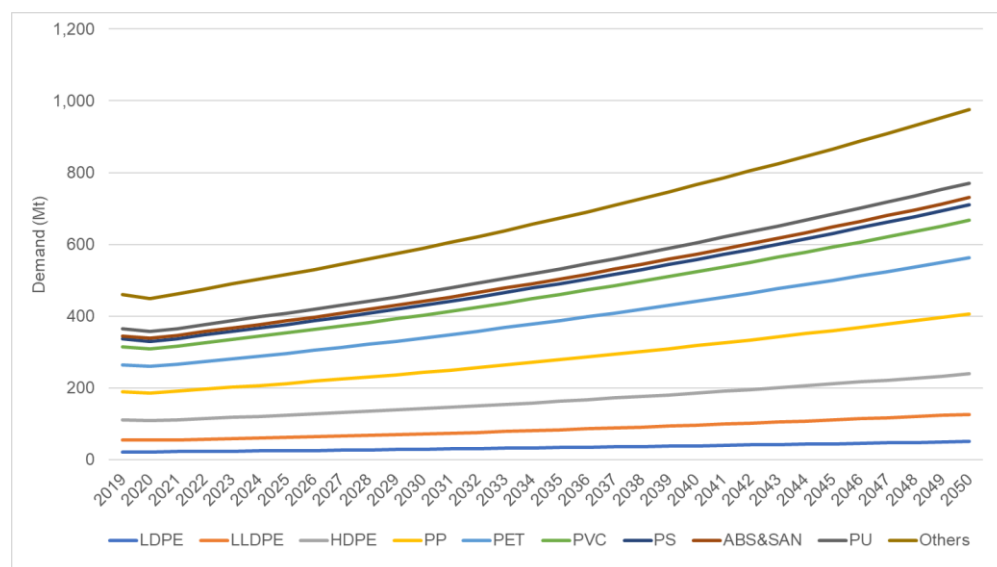

**Supplementary Fig. S33. Plastic demand between 2019 and 2050 per polymer type, assumed in the 2.5% annual growth scenario.**

Note: 'Mt' refers to Million tonnes. Source: (1)

## References

1. N. Karali, N. Khanna, N. Shah, "Climate impact of primary plastic production," (Report #: LBNL-2001585, Lawrence Berkeley National Laboratory, 2024). <https://escholarship.org/uc/item/12s624vf>
2. D.S. Achilias, A. Giannoulis, G.Z. Papageorgiou, Recycling of polymers from plastic packaging materials using the dissolution–reprecipitation technique. *Polym. Bull.* **63**, 449–465 (2009).
3. T. Uekert, A. Singh, J.S. DesVeaux, T. Ghosh, A. Bhatt, G. Yadav, S. Afzal, J. Walzberg, K.M. Knauer, S.R. Nicholson, G.T. Beckham, A.C. Carpenter, Technical, Economic, and Environmental Comparison of Closed-Loop Recycling Technologies for Common Plastics. *ACS Sustainable Chemistry & Engineering* **11** (3), 965–978 (2023).
4. U.S. Chaudhari, D.G. Kulas, A. Peralta, T. Hossain, A.T. Johnson, D.S. Hartley, R.M. Handler, B.K. Reck, V.S. Thompson, D.W. Watkins, D.R. Shonnard, Solvent based dissolution–precipitation of waste polyethylene terephthalate: economic and environmental performance metrics. *RSC Sustainability*, **1**, 1849–1860 (2023).
5. L. Anderson, E. Yu, W.T. Chen, Chemical Recycling of Mixed Plastics in Electronic Waste Using Solvent-Based Processing. *Processes*, **10**, 66 (2022).
6. T. Lu, W.T. Chen, Material recycling of Acrylonitrile Butadiene Styrene (ABS) from toy waste using density separation and safer solvents. *Resources, Conservation and Recycling*, **197**, 107090 (2023).
7. R.L. Smith, S. Takkellapati R.C. Riegerix, Recycling of Plastics in the United States: Plastic Material Flows and Polyethylene Terephthalate (PET) Recycling Processes. *ACS Sustain Chem Eng.*, **10**, 2084–2096 (2022).
8. F.d S.M. Teixeira, A.C.d C. Peres, E.B.A.V. Pacheco, Mechanical recycling of acrylonitrile-butadiene-styrene copolymer and high impact polystyrene from waste electrical and electronic equipment to comply with the circular economy. *Front. Sustain.* **4**, 1203457 (2023).
9. Metro Waste Authority (MWA), "Materials Recovery Facility Feasibility Study," (HDR, 399-1000 8404 Omaha, NE, 2018). [https://resource-recycling.com/resourcerecycling/wp-content/uploads/2020/06/December\\_2018\\_Board\\_Packet-23-94.pdf](https://resource-recycling.com/resourcerecycling/wp-content/uploads/2020/06/December_2018_Board_Packet-23-94.pdf)

10. A. Arostegui, M. Sarrionandia, J. Aurrekoetxea, I. Urrutibeascoa, Effect of dissolution-based recycling on the degradation and the mechanical properties of acrylonitrile–butadiene–styrene copolymer. *Polymer Degradation and Stability*, **91**, 2768–2774 (2006).
11. S. Wagner, M. Schlummer, Application of solvent-based dissolution for the recycling of polyvinylchloride flooring waste containing restricted phthalate plasticizers. *Resources, Conservation and Recycling*, **211**, 107889 (2024).
12. K. Lewandowski, K. Skórczewska, A Brief Review of Poly(Vinyl Chloride) (PVC) Recycling. *Polymers*, **14**, 15: 3035 (2022).
13. E.M. Kampouris, D.C. Diakoulaki, C.D. Papaspyrides, Solvent recycling of rigid poly(vinyl chloride) bottles. *Journal of Vinyl Technology*, **8**, 2 (1986).
14. M. Klotz, C. Oberschelp, C. Salah, L. Subal, S. Hellweg, The role of chemical and solvent-based recycling within a sustainable circular economy for plastics. *Science of The Total Environment* **906**, 167586 (2024).
15. J. Cao, H. Liang, J. Yang, Z. Zhu, J. Deng, X. Li, M. Elimelech, X. Lu, Depolymerization mechanisms and closed-loop assessment in polyester waste recycling. *Nat Commun*, **15**, 6266 (2024).
16. D.S. Achilias, C. Roupakias, P. Megalokononimos, A.A. Lappas, E.V. Antonakou, Chemical recycling of plastic wastes made from polyethylene (LDPE and HDPE) and polypropylene (PP). *Journal of Hazardous Materials*, **149**, 536–542 (2007).
17. A. McNeeley, Y.A. Liu, Assessment of PET Depolymerization Processes for Circular Economy. 2. Process Design Options and Process Modeling Evaluation for Methanolysis, Glycolysis, and Hydrolysis. *Ind. Eng. Chem. Res.*, **63**, 3400–3424 (2024).
18. S. Muangmeesri, K.R. Baddigam, K. Navare, V. Apostolopoulou-Kalkavoura, K. Witthayolankowit, H. Håkansson, A.P. Mathew, K. Van Acker, J.S.M. Samec, Recycling of Polyesters by Organocatalyzed Methanolysis Depolymerization: Environmental Sustainability Evaluated by Life Cycle Assessment. *ACS Sustain. Chem. Eng.*, **12**, 4114–4120 (2024).
19. L. Zhou, E. Qin, H. Huang, Y. Wang, M. Li, PET Glycolysis to BHET Efficiently Catalyzed by Stable and Recyclable Pd-Cu/ $\gamma$ -Al<sub>2</sub>O<sub>3</sub>. *Molecules*, **29**, 4305 (2024).
20. P.T. Benavides, U.R. Gracida-Alvarez, U. Lee, M.Q. Wang, Life-cycle Analysis of Conversion of Post-Use Plastic via Pyrolysis with the GREET Model. Argonne National Laboratory, (ANL-22/37; 176242, 2022). <https://doi.org/10.2172/1885570>
21. G.F. Cardamone, F. Ardolino, U. Arena, Can plastics from end-of-life vehicles be managed in a sustainable way? *Sustainable Production and Consumption*, **29**, 115–127 (2022).
22. M. Larrain, S. Van Passel, G. Thomassen, U. Kresovic, N. Alderweireldt, E. Moerman, P. Billen, Economic performance of pyrolysis of mixed plastic waste: Open-loop versus closed-loop recycling. *Journal of Cleaner Production*, **270**, 122442 (2020).
23. J.L. Brown, R.C. Brown, V.S. Cecon, K. Vorst, R.G. Smith, T.J. Dugaard, Increasing pyrolysis oil yields and decreasing energy consumption via thermal oxo-degradation of polyolefins. *Cell Reports Physical Science*, **5**, 101856 (2024).
24. G. Yadav, A. Singh, A. Dutta, T. Uekert, J. S. DesVeaux, S.R. Nicholson, E.C.D. Tan, C. Mukarakate, J. A. Schaidle, C.J. Wrasman, A.C. Carpenter, R.M. Baldwin, Y. Román-Leshkov, G.T. Beckham, Techno-economic analysis and life cycle assessment for catalytic fast pyrolysis of mixed plastic waste. *Energy Environ. Sci.*, **16**, 3638–3653 (2023).
25. M. Kusenberg, G.C. Faussone, H.D. Thi, M. Roosen, M. Grilc, A. Eschenbacher, S. De Meester, K.M. Van Geem, Maximizing olefin production via steam cracking of distilled pyrolysis oils from difficult-to-recycle municipal plastic waste and marine litter. *Science of The Total Environment*, **838**, 156092 (2022)

26. M. Kusenber, M. Roosen, A. Doktor, L. Casado, A.J. Abdulrahman, B. Parvizi, A. Eschenbacher, E. Biadi, N. Laudou, D. Jansch, S. De Meester, K.M. Van Geem, Contaminant removal from plastic waste pyrolysis oil via depth filtration and the impact on chemical recycling: A simple solution with significant impact. *Chemical Engineering Journal*, **473**, 145259 (2023).
27. C. Zhang, L. Chao, Z. Zhang, L. Zhang, Q. Li, H. Fan, S. Zhang, Q. Liu, Y. Qiao, Y. Tian, Y. Wang, X. Hu, Pyrolysis of cellulose: Evolution of functionalities and structure of bio-char versus temperature. *Renewable and Sustainable Energy Reviews*, **135**, 110416 (2021).
28. M.R. Reed, E.R. Belden, N.K. Kazantzis, M.T. Timko, B. Castro-Dominguez, Thermodynamic and economic analysis of a deployable and scalable process to recover Monomer-Grade styrene from waste polystyrene. *Chemical Engineering Journal*, **492**, 152079 (2024).
29. D.K. Ojha, R. Vinu, Resource recovery via catalytic fast pyrolysis of polystyrene using zeolites. *Journal of Analytical and Applied Pyrolysis*, **113**, 349–359 (2015).
30. D.T.L. Arielle, W.G. Nalume, Y. Gilbert, A Review of the Life Cycle Analysis for Plastic Waste Pyrolysis. *Open Journal of Polymer Chemistry*, **14**, 113–145 (2024).
31. T. Xayachak, N. Haque, D. Lau, R. Parthasarathy, B.K. Pramanik, Assessing the environmental footprint of plastic pyrolysis and gasification: A life cycle inventory study. *Process Safety and Environmental Protection*, **173**, 592–603 (2023).
32. M.H. Javed, A. Ahmad, M. Rehan, F. Musharavati, A.S. Nizami, M.I. Khan, Advancing Sustainable Energy: Environmental and Economic Assessment of Plastic Waste Gasification for Syngas and Electricity Generation Using Life Cycle Modeling. *Sustainability*, **17**, 1277 (2025).
33. C. Marchese, “Polyethylene gasification for hydrogen, methanol, and fuels production: an integrated chemistry modelling, process simulation and environmental assessment,” thesis, Politecnico Milano (2023).
34. K. Prifti, A. Galeazzi, F. Manenti, Design and Simulation of a Plastic Waste to Methanol Process: Yields and Economics. *Industrial & Engineering Chemistry Research*, **62**, 5083–5096 (2023).
35. S.Y. Kim, S.Y. Hwang, J.Y. Maeng, C.K. Rhee, Y. Sohn, Electrochemical syngas production over Au/SrTiO<sub>3</sub> and Fischer–Tropsch synthesis chemistry for long-chain hydrocarbons. *International Journal of Hydrogen Energy*, **51**, 571–587 (2024).
36. M.A. Bashir, T. Ji, J. Weidman, Y. Soong, M. Gray, F. Shi, P. Wang, Plastic waste gasification for low-carbon hydrogen production: a comprehensive review. *Energy Adv.*, **4**, 330–363 (2025).
37. H.H. Shah, M. Amin, A. Iqbal, I. Nadeem, M. Kalin, A.M. Soomar, A.M. Galal, A review on gasification and pyrolysis of waste plastics. *Front Chem.*, **10**, 960894 (2023).
38. S.R. Clough, S.R. Hexane. Editor(s): Philip Wexler. *Encyclopedia of Toxicology* (Third Edition). (Academic Press, 2014). ISBN 978012386455.
39. C.J.C. Rodrigues, C.C.R. de Carvalho Process Development for Benzyl Alcohol Production by Whole-Cell Biocatalysis in Stirred and Packed Bed Reactors. *Microorganisms*, **10**, 966 (2022).
40. Y. Hao, C. Pischetola, F. Cárdenas-Lizana, M.A. Keane, Selective Liquid Phase Hydrogenation of Benzaldehyde to Benzyl Alcohol Over Alumina Supported Gold. *Catal Lett.*, **150**, 881–887 (2020).
41. S. Pugh, R. McKenna, I. Halloum, D.R. Nielsen, Engineering *Escherichia coli* for renewable benzyl alcohol production, *Metabolic Engineering Communications*, **2**, 39–45 (2015).
42. Ullmann’s Encyclopedia of Industrial Chemistry, “Benzyl Alcohol,” In: Ullmann's Encyclopedia of Industrial Chemistry, (Wiley-VCH Verlag GmbH & Co. KGaA, 2020).  
[https://doi.org/10.1002/14356007.a04\\_045.pub2](https://doi.org/10.1002/14356007.a04_045.pub2)
43. K. Seper, “Benzyl Chloride, Benzal Chloride, and Benzotrichloride,” in *Kirk-Othmer Encyclopedia of Chemical Technology*, (Wiley & Sons, 2001).
44. M.A. Ali, A. Abutaleb, An Updated Comprehensive Literature Review of Phenol Hydrogenation Studies. *Catal Lett.*, **152**, 1555–1581 (2022).

45. N.H. Attanayake, M. Tan, Performance and pathways of electrochemical cyclohexane oxidation, *Current Opinion in Electrochemistry*, **30**, 100791 (2021).
46. A.C. Dimian, C.S. Bildea, "Chapter 5: Phenol Hydrogenation to Cyclohexanone," in *Chemical Process Design: Computer-Aided Case Studies*, (Wiley-VCH Verlag GmbH & Co. KGa, Weinheim, 2008)
47. E.A. Dada, L. Achenie, "Production of Cyclohexane from Hydrogenation of Benzene using Microreactor Technology," in *Computer Aided Chemical Engineering*, (Elsevier, **31**, 2012).
48. A.A. Said, M.M.M. Abd El-Wahab, M.N. Goda, Selective synthesis of acetone from isopropyl alcohol over active and stable CuO–NiO nanocomposites at relatively low-temperature. *Egyptian Journal of Basic and Applied Sciences*, **3**, 357–365 (2016).
49. W.L. Howard, "Acetone," in *Kirk-Othmer Encyclopedia of Chemical Technology*, (Wiley & Sons, 2011).
50. International Energy Agency (IEA), Energy and GHG Reductions in the Chemical Industry via Catalytic Processes: ANNEXES. (DECHEMA/IEA/ICCA, 2013)
51. B. Daowdat, G.D. Hoeltzel, R. Tannenbaum, "Direct Route to Phenol from Benzene," in *Senior Design Reports (CBE)*, (University of Pennsylvania ScholarlyCommons, 2017)  
[http://repository.upenn.edu/cbe\\_sdr/98](http://repository.upenn.edu/cbe_sdr/98)
52. R.J. Schmidt, Industrial catalytic processes—phenol production. *Applied Catalysis A: General*, **280**, 89–103 (2005).
53. American Chemical Society (ACS), "Dichloromethane," (Molecule of the Week Archive, 2019).  
<https://www.acs.org/molecule-of-the-week/archive/d/dichloromethane.html>
54. IARC Working Group on the Evaluation of Carcinogenic Risks to Humans. Re-evaluation of Some Organic Chemicals, Hydrazine and Hydrogen Peroxide. Lyon (FR): International Agency for Research on Cancer. (IARC Monographs on the Evaluation of Carcinogenic Risks to Humans, No. 71., 1999). <https://www.ncbi.nlm.nih.gov/books/NBK499382/>
55. O'Brien et al. (2005). "Volume I: Fundamentals," in *Handbook of Chlor-Alkali Technology*, (Springer, 2005).
56. F. Ullmann, "Sodium Hydroxide," in *Ullmann's Encyclopedia of Industrial Chemistry* (7th ed., Vol. 9). (Wiley-VCH, 2011).
57. Market.US Global Sodium Hydroxide Market by Production Method. Report ID: 123529, (Market US, 2024). <https://market.us/report/sodium-hydroxide-market/>
58. Environment Agency Austria (EAA), Sulphuric Acid Production, (Umweltbundesamt Vienna, 2017)  
[https://www.umweltbundesamt.at/fileadmin/site/themen/industrie/sulphuric\\_acid\\_production-installation\\_1.pdf](https://www.umweltbundesamt.at/fileadmin/site/themen/industrie/sulphuric_acid_production-installation_1.pdf)
59. A.R. Smith, J. Klosek, A review of air separation technologies and their integration with energy conversion processes. *Fuel Processing Technology*, **70**, 115–134 (2001).
